# Supplementary material for: Genome-Wide Identification and Expression Profile Analysis of the Phenylalanine Ammonia-Lyase Gene Family in Hevea brasiliensis
Source: MDPI journal article supplement (doi:10.3390/ijms25095052), 2024-05-06
Supplement: s1 [file s1]

**Genome-Wide Identification and Expression Profile Analysis of the  
Phenylalanine Ammonia-Lyase Gene Family in *Hevea brasiliensis***

Hui Liu<sup>\*,†</sup>, Qiguang He<sup>†</sup>, Yiyu Hu, Ruilin Lu, Shuang Wu, Chengtian Feng, Kun Yuan  
and Zhenhui Wang<sup>\*</sup>

Key Laboratory of Biology and Genetic Resources of Rubber Tree, Ministry of  
Agriculture and Rural Affairs/State Key Laboratory Incubation Base for Cultivation &  
Physiology of Tropical Crops, Rubber Research Institute, Chinese Academy of  
Tropical Agricultural Sciences, Haikou 571101, China

<sup>†</sup> These authors contributed equally to this work.

<sup>\*</sup> Correspondence: liuhui@catas.cn (H. L.); wzh36@catas.cn (Z.W.)

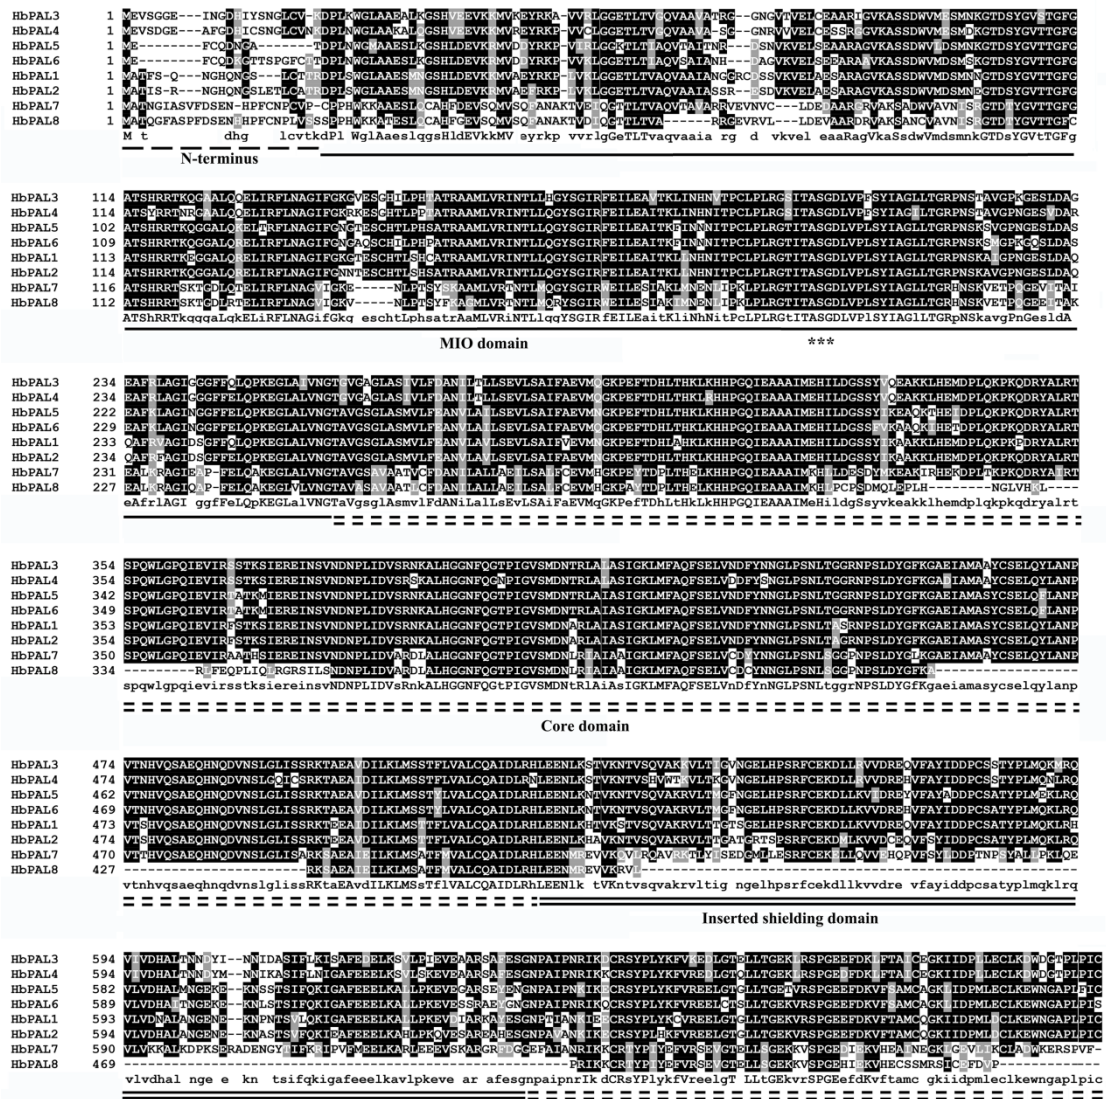

**Figure S1.** Multiple sequence alignment of HbPAL proteins. The four functional domains, including the N-terminus (single dashed line), MIO domain (single solid line), core domain (double dashed line), and inserted shielding domain (double solid line), are indicated. The conserved Ala-Ser-Gly (ASG) tripeptide motif is marked with asterisks (\*\*\*)

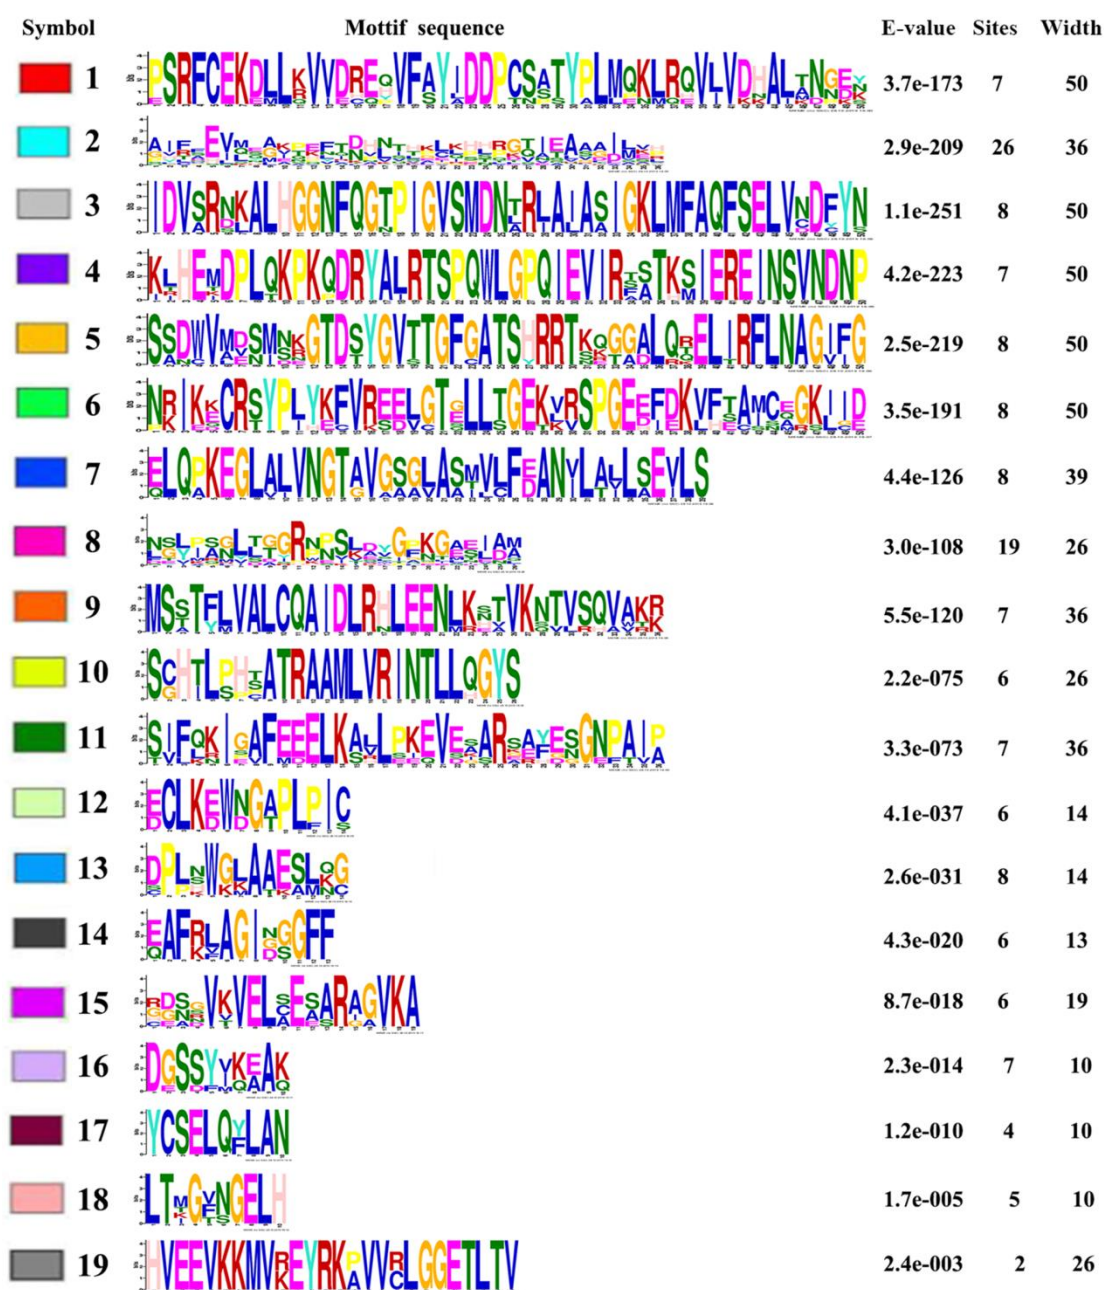

**Figure S2.** Sequence logos of conserved motifs identified in HbPAL proteins by MEME analysis.

**Table S1.** Percent identity matrix of HbPAL proteins.

|        | HbPAL1 | HbPAL2 | HbPAL3 | HbPAL4 | HbPAL5 | HbPAL6 | HbPAL7 | HbPAL8 |
|--------|--------|--------|--------|--------|--------|--------|--------|--------|
| HbPAL1 | 100.00 |        |        |        |        |        |        |        |
| HbPAL2 | 92.97  | 100.00 |        |        |        |        |        |        |
| HbPAL3 | 80.85  | 80.36  | 100.00 |        |        |        |        |        |
| HbPAL4 | 79.15  | 78.68  | 91.30  | 100.00 |        |        |        |        |
| HbPAL5 | 86.18  | 86.61  | 82.34  | 80.17  | 100.00 |        |        |        |
| HbPAL6 | 84.99  | 84.91  | 81.92  | 79.66  | 93.16  | 100.00 |        |        |
| HbPAL7 | 62.05  | 62.54  | 62.68  | 61.82  | 63.77  | 62.70  | 100.00 |        |
| HbPAL8 | 55.64  | 56.12  | 55.73  | 54.95  | 57.65  | 56.67  | 84.42  | 100.00 |

**Table S2.** List of *cis*-acting elements identified in *HbPALs* promoters.

| Promotor | Site Name   | Sequence     | Position | Matrix score. | Strand | Organism             | Function                                                        |
|----------|-------------|--------------|----------|---------------|--------|----------------------|-----------------------------------------------------------------|
| HbPAL1   | AAGAA-motif | gGTAAAGAAA   | 337      | 9             | -      | Avena sativa         |                                                                 |
| HbPAL1   | AC-I        | GCTTACCTACCA | 518      | 11            | +      | Arabidopsis thaliana |                                                                 |
| HbPAL1   | AC-II       | CCACCAACCCCC | 356      | 11            | +      | Phaseolus vulgaris   |                                                                 |
| HbPAL1   | AE-box      | AGAAACAA     | 1174     | 8             | -      | Arabidopsis thaliana | part of a module for light response                             |
| HbPAL1   | as-1        | TGACG        | 725      | 5             | -      | Arabidopsis thaliana |                                                                 |
| HbPAL1   | as-1        | TGACG        | 944      | 5             | +      | Arabidopsis thaliana |                                                                 |
| HbPAL1   | AT~TATA-box | TATATA       | 44       | 6             | +      | Arabidopsis thaliana |                                                                 |
| HbPAL1   | AT~TATA-box | TATATA       | 1183     | 6             | -      | Arabidopsis thaliana |                                                                 |
| HbPAL1   | Box 4       | ATTAAT       | 85       | 6             | +      | Petroselinum crispum | part of a conserved DNA module involved in light responsiveness |
| HbPAL1   | Box 4       | ATTAAT       | 149      | 6             | +      | Petroselinum crispum | part of a conserved DNA module involved in light responsiveness |
| HbPAL1   | Box 4       | ATTAAT       | 229      | 6             | +      | Petroselinum crispum | part of a conserved DNA module involved in light responsiveness |
| HbPAL1   | Box 4       | ATTAAT       | 469      | 6             | +      | Petroselinum crispum | part of a conserved DNA module involved in light responsiveness |
| HbPAL1   | Box 4       | ATTAAT       | 1497     | 6             | -      | Petroselinum crispum | part of a conserved DNA module involved in light responsiveness |
| HbPAL1   | Box 4       | ATTAAT       | 1513     | 6             | -      | Petroselinum crispum | part of a conserved DNA module involved in light responsiveness |
| HbPAL1   | Box 4       | ATTAAT       | 1524     | 6             | -      | Petroselinum crispum | part of a conserved DNA module involved in light responsiveness |
| HbPAL1   | Box 4       | ATTAAT       | 1592     | 6             | -      | Petroselinum crispum | part of a conserved DNA module involved in light responsiveness |
| HbPAL1   | Box 4       | ATTAAT       | 1809     | 6             | -      | Petroselinum crispum | part of a conserved DNA module involved in light responsiveness |
| HbPAL1   | Box 4       | ATTAAT       | 1950     | 6             | -      | Petroselinum crispum | part of a conserved DNA module involved in light responsiveness |
| HbPAL1   | Box III     | atCATTTTCACt | 885      | 11            | -      | Pisum sativum        | protein binding site                                            |
| HbPAL1   | box S       | AGCCACC      | 897      | 7             | -      | Arabidopsis thaliana |                                                                 |
| HbPAL1   | CAAT-box    | CAAT         | 153      | 4             | -      | Nicotiana glutinosa  |                                                                 |
| HbPAL1   | CAAT-box    | CAAAT        | 202      | 5             | -      | Pisum sativum        | common cis-acting element in promoter and enhancer regions      |
| HbPAL1   | CAAT-box    | CAAT         | 274      | 4             | +      | Nicotiana glutinosa  |                                                                 |

|        |          |         |      |   |   |                      |                                                            |
|--------|----------|---------|------|---|---|----------------------|------------------------------------------------------------|
| HbPAL1 | CAAT-box | TGCCAAC | 307  | 7 | + | Petunia hybrida      | common cis-acting element in promoter and enhancer regions |
| HbPAL1 | CAAT-box | CAAT    | 325  | 4 | + | Nicotiana glutinosa  |                                                            |
| HbPAL1 | CAAT-box | CAAAT   | 396  | 5 | + | Pisum sativum        | common cis-acting element in promoter and enhancer regions |
| HbPAL1 | CAAT-box | CAAT    | 458  | 4 | + | Nicotiana glutinosa  |                                                            |
| HbPAL1 | CAAT-box | CAAT    | 553  | 4 | + | Nicotiana glutinosa  |                                                            |
| HbPAL1 | CAAT-box | CAAT    | 557  | 4 | + | Nicotiana glutinosa  |                                                            |
| HbPAL1 | CAAT-box | CAAT    | 559  | 4 | - | Nicotiana glutinosa  |                                                            |
| HbPAL1 | CAAT-box | CAAAT   | 577  | 5 | - | Pisum sativum        | common cis-acting element in promoter and enhancer regions |
| HbPAL1 | CAAT-box | CAAAT   | 740  | 5 | - | Pisum sativum        | common cis-acting element in promoter and enhancer regions |
| HbPAL1 | CAAT-box | CAAT    | 745  | 4 | - | Nicotiana glutinosa  |                                                            |
| HbPAL1 | CAAT-box | CAAT    | 860  | 4 | + | Nicotiana glutinosa  |                                                            |
| HbPAL1 | CAAT-box | CAAT    | 967  | 4 | - | Nicotiana glutinosa  |                                                            |
| HbPAL1 | CAAT-box | TGCCAAC | 969  | 7 | + | Petunia hybrida      | common cis-acting element in promoter and enhancer regions |
| HbPAL1 | CAAT-box | CAAAT   | 1104 | 5 | - | Pisum sativum        | common cis-acting element in promoter and enhancer regions |
| HbPAL1 | CAAT-box | CAAT    | 1298 | 4 | - | Nicotiana glutinosa  |                                                            |
| HbPAL1 | CAAT-box | CAAAT   | 1304 | 5 | - | Pisum sativum        | common cis-acting element in promoter and enhancer regions |
| HbPAL1 | CAAT-box | CAAT    | 1325 | 4 | - | Nicotiana glutinosa  |                                                            |
| HbPAL1 | CAAT-box | CAAT    | 1331 | 4 | + | Nicotiana glutinosa  |                                                            |
| HbPAL1 | CAAT-box | CAAT    | 1342 | 4 | + | Nicotiana glutinosa  |                                                            |
| HbPAL1 | CAAT-box | CCAAT   | 1456 | 5 | - | Arabidopsis thaliana | common cis-acting element in promoter and enhancer regions |
| HbPAL1 | CAAT-box | CAAT    | 1470 | 4 | + | Nicotiana glutinosa  |                                                            |
| HbPAL1 | CAAT-box | CAAT    | 1528 | 4 | - | Nicotiana glutinosa  |                                                            |
| HbPAL1 | CAAT-box | CAAT    | 1570 | 4 | - | Nicotiana glutinosa  |                                                            |
| HbPAL1 | CAAT-box | CAAT    | 1779 | 4 | + | Nicotiana glutinosa  |                                                            |
| HbPAL1 | CAAT-box | CAAT    | 1785 | 4 | + | Nicotiana glutinosa  |                                                            |
| HbPAL1 | CAAT-box | CAAT    | 1897 | 4 | + | Nicotiana glutinosa  |                                                            |

|        |             |             |      |    |   |                      |                                                                   |
|--------|-------------|-------------|------|----|---|----------------------|-------------------------------------------------------------------|
| HbPAL1 | CAAT-box    | CAAAT       | 1945 | 5  | - | Pisum sativum        | common cis-acting element in promoter and enhancer regions        |
| HbPAL1 | CARE        | CAACTCAC    | 1410 | 8  | - | Oryza sativa         |                                                                   |
| HbPAL1 | CAT-box     | GCCACT      | 463  | 6  | + | Arabidopsis thaliana | cis-acting regulatory element related to meristem expression      |
| HbPAL1 | CCAAT-box   | CAACGG      | 972  | 6  | + | Hordeum vulgare      | MYBHv1 binding site                                               |
| HbPAL1 | CCAAT-box   | CAACGG      | 1071 | 6  | + | Hordeum vulgare      | MYBHv1 binding site                                               |
| HbPAL1 | CGTCA-motif | CGTCA       | 725  | 5  | + | Hordeum vulgare      | cis-acting regulatory element involved in the MeJA-responsiveness |
| HbPAL1 | CGTCA-motif | CGTCA       | 944  | 5  | - | Hordeum vulgare      | cis-acting regulatory element involved in the MeJA-responsiveness |
| HbPAL1 | DRE core    | GCCGAC      | 1017 | 6  | - | Arabidopsis thaliana | dehydration-responsive element                                    |
| HbPAL1 | ERE         | ATTTTAAA    | 33   | 8  | + | Nicotiana glutinos   | ethylene-responsive element                                       |
| HbPAL1 | ERE         | ATTTTAAA    | 79   | 8  | - | Nicotiana glutinos   | ethylene-responsive element                                       |
| HbPAL1 | ERE         | ATTTTAAA    | 185  | 8  | + | Nicotiana glutinos   | ethylene-responsive element                                       |
| HbPAL1 | ERE         | ATTTTAAA    | 187  | 8  | - | Nicotiana glutinos   | ethylene-responsive element                                       |
| HbPAL1 | ERE         | ATTTTAAA    | 214  | 8  | - | Nicotiana glutinos   | ethylene-responsive element                                       |
| HbPAL1 | ERE         | ATTTTAAA    | 1887 | 8  | + | Nicotiana glutinos   | ethylene-responsive element                                       |
| HbPAL1 | GATA-motif  | AAGATAAGATT | 1871 | 10 | + | Arabidopsis thaliana | part of a light responsive element                                |
| HbPAL1 | G-box       | CACGAC      | 583  | 6  | - | Zea mays             | cis-acting regulatory element involved in light responsiveness    |
| HbPAL1 | G-box       | CACGAC      | 819  | 6  | + | Zea mays             | cis-acting regulatory element involved in light responsiveness    |
| HbPAL1 | GCN4_motif  | TGAGTCA     | 855  | 7  | + | Oryza sativa         | cis-regulatory element involved in endosperm expression           |
| HbPAL1 | GCN4_motif  | TGAGTCA     | 1253 | 7  | - | Oryza sativa         | cis-regulatory element involved in endosperm expression           |
| HbPAL1 | LTR         | CCGAAA      | 1346 | 6  | - | Hordeum vulgare      | cis-acting element involved in low-temperature responsiveness     |
| HbPAL1 | MBS         | CAACTG      | 566  | 6  | + | Arabidopsis thaliana | MYB binding site involved in drought-inducibility                 |
| HbPAL1 | MYB         | CAACCA      | 310  | 6  | + | Arabidopsis thaliana | MYB binding site                                                  |
| HbPAL1 | MYB         | CAACAG      | 349  | 6  | - | Arabidopsis thaliana | MYB binding site                                                  |
| HbPAL1 | MYB         | CAACCA      | 478  | 6  | + | Arabidopsis thaliana | MYB binding site                                                  |
| HbPAL1 | MYB         | TAACCA      | 684  | 6  | + | Arabidopsis thaliana | MYB binding site                                                  |
| HbPAL1 | MYB         | CAACAG      | 702  | 6  | - | Arabidopsis thaliana | MYB binding site                                                  |



|        |                         |                            |      |   |   |                      |                                                                      |
|--------|-------------------------|----------------------------|------|---|---|----------------------|----------------------------------------------------------------------|
| HbPAL1 | Myb                     | CAACTG                     | 566  | 6 | + | Arabidopsis thaliana | MYB binding site                                                     |
| HbPAL1 | MYB<br>recognition site | CCGTTG                     | 972  | 6 | - | Arabidopsis thaliana | MYB binding site                                                     |
| HbPAL1 | MYB<br>recognition site | CCGTTG                     | 1071 | 6 | - | Arabidopsis thaliana | MYB binding site                                                     |
| HbPAL1 | Myb-binding<br>site     | CAACAG                     | 349  | 6 | - | Nicotiana tabacum    | MYB binding site                                                     |
| HbPAL1 | Myb-binding<br>site     | CAACAG                     | 702  | 6 | - | Nicotiana tabacum    | MYB binding site                                                     |
| HbPAL1 | MYB-like<br>sequence    | TAACCA                     | 684  | 6 | + | Arabidopsis thaliana | MYB binding site                                                     |
| HbPAL1 | MYC                     | CAATTG                     | 557  | 6 | + | Arabidopsis thaliana | MYC binding site                                                     |
| HbPAL1 | MYC                     | CATTTG                     | 739  | 6 | + | Arabidopsis thaliana | MYC binding site                                                     |
| HbPAL1 | MYC                     | CATTTG                     | 1303 | 6 | + | Arabidopsis thaliana | MYC binding site                                                     |
| HbPAL1 | O2-site                 | GATGATGTGG                 | 291  | 9 | + | Zea mays             | cis-acting regulatory element involved in zein metabolism regulation |
| HbPAL1 | O2-site                 | GATGA(C/T)(A/G)TG<br>(A/G) | 880  | 8 | + | Zea mays             | cis-acting regulatory element involved in zein metabolism regulation |
| HbPAL1 | P-box                   | CCTTTTG                    | 1402 | 7 | + | Oryza sativa         | gibberellin-responsive element                                       |
| HbPAL1 | STRE                    | AGGGG                      | 346  | 5 | - | Arabidopsis thaliana |                                                                      |
| HbPAL1 | STRE                    | AGGGG                      | 1315 | 5 | + | Arabidopsis thaliana |                                                                      |
| HbPAL1 | TATA                    | TATAAAAT                   | 5    | 8 | - | Arabidopsis thaliana |                                                                      |
| HbPAL1 | TATA                    | TATAAAAT                   | 170  | 8 | + | Arabidopsis thaliana |                                                                      |
| HbPAL1 | TATA                    | TATAAAAT                   | 242  | 8 | + | Arabidopsis thaliana |                                                                      |
| HbPAL1 | TATA                    | TATAAAAT                   | 1879 | 8 | - | Arabidopsis thaliana |                                                                      |
| HbPAL1 | TATA-box                | TATAAAA                    | 6    | 7 | - | Pisum sativum        | core promoter element around -30 of transcription start              |



|        |          |            |      |   |   |                             |                                                         |
|--------|----------|------------|------|---|---|-----------------------------|---------------------------------------------------------|
| HbPAL1 | TATA-box | TATAAA     | 7    | 6 | - | <i>Helianthus annuus</i>    | core promoter element around -30 of transcription start |
| HbPAL1 | TATA-box | TATAA      | 8    | 5 | - | <i>Arabidopsis thaliana</i> | core promoter element around -30 of transcription start |
| HbPAL1 | TATA-box | TATA       | 9    | 4 | + | <i>Arabidopsis thaliana</i> | core promoter element around -30 of transcription start |
| HbPAL1 | TATA-box | TATTTAAA   | 35   | 8 | - | <i>Arabidopsis thaliana</i> | core promoter element around -30 of transcription start |
| HbPAL1 | TATA-box | ATATAT     | 43   | 6 | + | <i>Brassica napus</i>       | core promoter element around -30 of transcription start |
| HbPAL1 | TATA-box | TATATA     | 44   | 6 | + | <i>Arabidopsis thaliana</i> | core promoter element around -30 of transcription start |
| HbPAL1 | TATA-box | ATATAT     | 45   | 6 | + | <i>Brassica napus</i>       | core promoter element around -30 of transcription start |
| HbPAL1 | TATA-box | TATA       | 46   | 4 | + | <i>Arabidopsis thaliana</i> | core promoter element around -30 of transcription start |
| HbPAL1 | TATA-box | ATATAT     | 69   | 6 | + | <i>Brassica napus</i>       | core promoter element around -30 of transcription start |
| HbPAL1 | TATA-box | TATA       | 70   | 4 | + | <i>Arabidopsis thaliana</i> | core promoter element around -30 of transcription start |
| HbPAL1 | TATA-box | TATAA      | 169  | 5 | - | <i>Arabidopsis thaliana</i> | core promoter element around -30 of transcription start |
| HbPAL1 | TATA-box | TATA       | 170  | 4 | + | <i>Arabidopsis thaliana</i> | core promoter element around -30 of transcription start |
| HbPAL1 | TATA-box | ATATAA     | 193  | 6 | + | <i>Brassica oleracea</i>    | core promoter element around -30 of transcription start |
| HbPAL1 | TATA-box | TATA       | 194  | 4 | + | <i>Arabidopsis thaliana</i> | core promoter element around -30 of transcription start |
| HbPAL1 | TATA-box | ATATAA     | 220  | 6 | + | <i>Brassica oleracea</i>    | core promoter element around -30 of transcription start |
| HbPAL1 | TATA-box | TATA       | 221  | 4 | + | <i>Arabidopsis thaliana</i> | core promoter element around -30 of transcription start |
| HbPAL1 | TATA-box | ATATAA     | 241  | 6 | + | <i>Brassica oleracea</i>    | core promoter element around -30 of transcription start |
| HbPAL1 | TATA-box | TATA       | 242  | 4 | + | <i>Arabidopsis thaliana</i> | core promoter element around -30 of transcription start |
| HbPAL1 | TATA-box | taTATAAAtc | 256  | 9 | - | <i>Arabidopsis thaliana</i> | core promoter element around -30 of transcription start |
| HbPAL1 | TATA-box | TATTTAAA   | 258  | 8 | - | <i>Arabidopsis thaliana</i> | core promoter element around -30 of transcription start |
| HbPAL1 | TATA-box | TATACA     | 494  | 6 | - | <i>Helianthus annuus</i>    | core promoter element around -30 of transcription start |
| HbPAL1 | TATA-box | TATA       | 496  | 4 | + | <i>Arabidopsis thaliana</i> | core promoter element around -30 of transcription start |
| HbPAL1 | TATA-box | TATTTAAA   | 640  | 8 | + | <i>Arabidopsis thaliana</i> | core promoter element around -30 of transcription start |
| HbPAL1 | TATA-box | TATA       | 907  | 4 | + | <i>Arabidopsis thaliana</i> | core promoter element around -30 of transcription start |
| HbPAL1 | TATA-box | TATATA     | 1183 | 6 | - | <i>Arabidopsis thaliana</i> | core promoter element around -30 of transcription start |
| HbPAL1 | TATA-box | TATA       | 1185 | 4 | - | <i>Arabidopsis thaliana</i> | core promoter element around -30 of transcription start |

|        |             |              |      |    |   |                      |                                                                   |
|--------|-------------|--------------|------|----|---|----------------------|-------------------------------------------------------------------|
| HbPAL1 | TATA-box    | TATA         | 1589 | 4  | - | Arabidopsis thaliana | core promoter element around -30 of transcription start           |
| HbPAL1 | TATA-box    | ATTATA       | 1619 | 6  | + | Brassica napus       | core promoter element around -30 of transcription start           |
| HbPAL1 | TATA-box    | TATAA        | 1620 | 5  | - | Arabidopsis thaliana | core promoter element around -30 of transcription start           |
| HbPAL1 | TATA-box    | TATA         | 1621 | 4  | - | Arabidopsis thaliana | core promoter element around -30 of transcription start           |
| HbPAL1 | TATA-box    | TATA         | 1627 | 4  | - | Arabidopsis thaliana | core promoter element around -30 of transcription start           |
| HbPAL1 | TATA-box    | tcTATAAATAgg | 1784 | 11 | + | Nicotiana tabacum    | core promoter element around -30 of transcription start           |
| HbPAL1 | TATA-box    | TATTTAAA     | 1814 | 8  | + | Arabidopsis thaliana | core promoter element around -30 of transcription start           |
| HbPAL1 | TATA-box    | TATATTATATTT | 1828 | 12 | - | Avena sativa         | core promoter element around -30 of transcription start           |
| HbPAL1 | TATA-box    | ATATAT       | 1836 | 6  | - | Brassica napus       | core promoter element around -30 of transcription start           |
| HbPAL1 | TATA-box    | TATA         | 1837 | 4  | - | Arabidopsis thaliana | core promoter element around -30 of transcription start           |
| HbPAL1 | TATA-box    | TATAAAA      | 1880 | 7  | - | Pisum sativum        | core promoter element around -30 of transcription start           |
| HbPAL1 | TATA-box    | TATAAA       | 1881 | 6  | - | Helianthus annuus    | core promoter element around -30 of transcription start           |
| HbPAL1 | TATA-box    | TATAA        | 1882 | 5  | - | Arabidopsis thaliana | core promoter element around -30 of transcription start           |
| HbPAL1 | TATA-box    | TATA         | 1883 | 4  | - | Arabidopsis thaliana | core promoter element around -30 of transcription start           |
| HbPAL1 | TATA-box    | TATTTAAA     | 1900 | 8  | - | Arabidopsis thaliana | core promoter element around -30 of transcription start           |
| HbPAL1 | TATA-box    | ATTATA       | 1932 | 6  | + | Brassica napus       | core promoter element around -30 of transcription start           |
| HbPAL1 | TATA-box    | TATAA        | 1933 | 5  | - | Arabidopsis thaliana | core promoter element around -30 of transcription start           |
| HbPAL1 | TATA-box    | TATA         | 1934 | 4  | - | Arabidopsis thaliana | core promoter element around -30 of transcription start           |
| HbPAL1 | TATA-box    | TACAAAA      | 1987 | 7  | + | Oryza sativa         | core promoter element around -30 of transcription start           |
| HbPAL1 | TCA-element | CCATCTTTTT   | 889  | 10 | - | Nicotiana tabacum    | cis-acting element involved in salicylic acid responsiveness      |
| HbPAL1 | TCA-element | TCAGAAGAGG   | 1368 | 9  | + | Brassica oleracea    | cis-acting element involved in salicylic acid responsiveness      |
| HbPAL1 | TCT-motif   | TCTTAC       | 1310 | 6  | - | Arabidopsis thaliana | part of a light responsive element                                |
| HbPAL1 | TCT-motif   | TCTTAC       | 1694 | 6  | - | Arabidopsis thaliana | part of a light responsive element                                |
| HbPAL1 | TGACG-motif | TGACG        | 725  | 5  | - | Hordeum vulgare      | cis-acting regulatory element involved in the MeJA-responsiveness |
| HbPAL1 | TGACG-motif | TGACG        | 944  | 5  | + | Hordeum vulgare      | cis-acting regulatory element involved in the MeJA-responsiveness |
| HbPAL1 | W box       | TTGACC       | 921  | 6  | - | Arabidopsis thaliana | WRKY binding site                                                 |

|        |             |              |      |    |   |                      |                                                                 |
|--------|-------------|--------------|------|----|---|----------------------|-----------------------------------------------------------------|
| HbPAL1 | W box       | TTGACC       | 1266 | 6  | + | Arabidopsis thaliana | WRKY binding site                                               |
| HbPAL1 | WRE3        | CCACCT       | 489  | 6  | + | Pisum sativum        | wound-responsive element                                        |
| HbPAL1 | WRE3        | CCACCT       | 656  | 6  | + | Pisum sativum        | wound-responsive element                                        |
| HbPAL1 | WRE3        | CCACCT       | 956  | 6  | - | Pisum sativum        | wound-responsive element                                        |
| HbPAL1 | WRE3        | CCACCT       | 1001 | 6  | - | Pisum sativum        | wound-responsive element                                        |
| HbPAL1 | WRE3        | CCACCT       | 1137 | 6  | - | Pisum sativum        | wound-responsive element                                        |
| HbPAL2 | AAGAA-motif | GAAAGAA      | 1616 | 7  | - | Avena sativa         |                                                                 |
| HbPAL2 | ABRE        | CACGTG       | 62   | 6  | + | Arabidopsis thaliana | cis-acting element involved in the abscisic acid responsiveness |
| HbPAL2 | ABRE        | ACGTG        | 63   | 5  | + | Arabidopsis thaliana | cis-acting element involved in the abscisic acid responsiveness |
| HbPAL2 | ABRE        | ACGTG        | 1532 | 5  | + | Arabidopsis thaliana | cis-acting element involved in the abscisic acid responsiveness |
| HbPAL2 | ABRE3a      | TACGTG       | 1531 | 6  | + | Zea mays             | cis-acting element involved in the abscisic acid responsiveness |
| HbPAL2 | ABRE4       | CACGTA       | 1531 | 6  | - | Zea mays             | cis-acting element involved in the abscisic acid responsiveness |
| HbPAL2 | AC-I        | GCTTACCTACCA | 1791 | 11 | + | Arabidopsis thaliana |                                                                 |
| HbPAL2 | as-1        | TGACG        | 39   | 5  | - | Arabidopsis thaliana |                                                                 |
| HbPAL2 | AT~TATA-box | TATATA       | 98   | 6  | + | Arabidopsis thaliana |                                                                 |
| HbPAL2 | AT~TATA-box | TATATA       | 1114 | 6  | - | Arabidopsis thaliana |                                                                 |
| HbPAL2 | AT~TATA-box | TATATAAA     | 1132 | 8  | - | Arabidopsis thaliana |                                                                 |
| HbPAL2 | AT~TATA-box | TATATA       | 1134 | 6  | - | Arabidopsis thaliana |                                                                 |
| HbPAL2 | AT~TATA-box | TATATA       | 1136 | 6  | - | Arabidopsis thaliana |                                                                 |
| HbPAL2 | AT~TATA-box | TATATA       | 1138 | 6  | - | Arabidopsis thaliana |                                                                 |
| HbPAL2 | AT~TATA-box | TATATA       | 1198 | 6  | - | Arabidopsis thaliana |                                                                 |
| HbPAL2 | AT~TATA-box | TATATA       | 1504 | 6  | - | Arabidopsis thaliana |                                                                 |
| HbPAL2 | Box 4       | ATTAAT       | 492  | 6  | + | Petroselinum crispum | part of a conserved DNA module involved in light responsiveness |
| HbPAL2 | Box 4       | ATTAAT       | 575  | 6  | + | Petroselinum crispum | part of a conserved DNA module involved in light responsiveness |
| HbPAL2 | Box 4       | ATTAAT       | 730  | 6  | + | Petroselinum crispum | part of a conserved DNA module involved in light responsiveness |
| HbPAL2 | Box 4       | ATTAAT       | 734  | 6  | + | Petroselinum crispum | part of a conserved DNA module involved in light responsiveness |

|        |          |        |      |   |   |                             |                                                                 |
|--------|----------|--------|------|---|---|-----------------------------|-----------------------------------------------------------------|
| HbPAL2 | Box 4    | ATTAAT | 738  | 6 | + | <i>Petroselinum crispum</i> | part of a conserved DNA module involved in light responsiveness |
| HbPAL2 | Box 4    | ATTAAT | 742  | 6 | + | <i>Petroselinum crispum</i> | part of a conserved DNA module involved in light responsiveness |
| HbPAL2 | Box 4    | ATTAAT | 746  | 6 | + | <i>Petroselinum crispum</i> | part of a conserved DNA module involved in light responsiveness |
| HbPAL2 | Box 4    | ATTAAT | 750  | 6 | + | <i>Petroselinum crispum</i> | part of a conserved DNA module involved in light responsiveness |
| HbPAL2 | Box 4    | ATTAAT | 930  | 6 | + | <i>Petroselinum crispum</i> | part of a conserved DNA module involved in light responsiveness |
| HbPAL2 | Box 4    | ATTAAT | 1100 | 6 | - | <i>Petroselinum crispum</i> | part of a conserved DNA module involved in light responsiveness |
| HbPAL2 | Box 4    | ATTAAT | 1210 | 6 | - | <i>Petroselinum crispum</i> | part of a conserved DNA module involved in light responsiveness |
| HbPAL2 | Box 4    | ATTAAT | 1332 | 6 | - | <i>Petroselinum crispum</i> | part of a conserved DNA module involved in light responsiveness |
| HbPAL2 | Box 4    | ATTAAT | 1365 | 6 | - | <i>Petroselinum crispum</i> | part of a conserved DNA module involved in light responsiveness |
| HbPAL2 | CAAT-box | CAAT   | 4    | 4 | + | <i>Nicotiana glutinosa</i>  |                                                                 |
| HbPAL2 | CAAT-box | CAAT   | 191  | 4 | - | <i>Nicotiana glutinosa</i>  |                                                                 |
| HbPAL2 | CAAT-box | CCAAT  | 251  | 5 | - | <i>Arabidopsis thaliana</i> | common cis-acting element in promoter and enhancer regions      |
| HbPAL2 | CAAT-box | CAAAT  | 277  | 5 | + | <i>Pisum sativum</i>        | common cis-acting element in promoter and enhancer regions      |
| HbPAL2 | CAAT-box | CAAT   | 290  | 4 | - | <i>Nicotiana glutinosa</i>  |                                                                 |
| HbPAL2 | CAAT-box | CCAAT  | 384  | 5 | - | <i>Arabidopsis thaliana</i> | common cis-acting element in promoter and enhancer regions      |
| HbPAL2 | CAAT-box | CAAT   | 418  | 4 | + | <i>Nicotiana glutinosa</i>  |                                                                 |
| HbPAL2 | CAAT-box | CAAAT  | 430  | 5 | + | <i>Pisum sativum</i>        | common cis-acting element in promoter and enhancer regions      |
| HbPAL2 | CAAT-box | CAAT   | 437  | 4 | + | <i>Nicotiana glutinosa</i>  |                                                                 |
| HbPAL2 | CAAT-box | CAAT   | 461  | 4 | + | <i>Nicotiana glutinosa</i>  |                                                                 |
| HbPAL2 | CAAT-box | CCAAT  | 484  | 5 | + | <i>Arabidopsis thaliana</i> | common cis-acting element in promoter and enhancer regions      |
| HbPAL2 | CAAT-box | CAAT   | 485  | 4 | + | <i>Nicotiana glutinosa</i>  |                                                                 |
| HbPAL2 | CAAT-box | CCAAT  | 489  | 5 | + | <i>Arabidopsis thaliana</i> | common cis-acting element in promoter and enhancer regions      |
| HbPAL2 | CAAT-box | CAAT   | 490  | 4 | + | <i>Nicotiana glutinosa</i>  |                                                                 |
| HbPAL2 | CAAT-box | CAAT   | 551  | 4 | + | <i>Nicotiana glutinosa</i>  |                                                                 |
| HbPAL2 | CAAT-box | CCAAT  | 648  | 5 | + | <i>Arabidopsis thaliana</i> | common cis-acting element in promoter and enhancer regions      |
| HbPAL2 | CAAT-box | CAAT   | 649  | 4 | + | <i>Nicotiana glutinosa</i>  |                                                                 |

|        |             |        |      |   |   |                      |                                                                   |
|--------|-------------|--------|------|---|---|----------------------|-------------------------------------------------------------------|
| HbPAL2 | CAAT-box    | CCAAT  | 671  | 5 | + | Arabidopsis thaliana | common cis-acting element in promoter and enhancer regions        |
| HbPAL2 | CAAT-box    | CAAT   | 672  | 4 | + | Nicotiana glutinosa  |                                                                   |
| HbPAL2 | CAAT-box    | CCAAT  | 687  | 5 | + | Arabidopsis thaliana | common cis-acting element in promoter and enhancer regions        |
| HbPAL2 | CAAT-box    | CAAT   | 688  | 4 | + | Nicotiana glutinosa  |                                                                   |
| HbPAL2 | CAAT-box    | CAAAT  | 781  | 5 | - | Pisum sativum        | common cis-acting element in promoter and enhancer regions        |
| HbPAL2 | CAAT-box    | CAAT   | 799  | 4 | + | Nicotiana glutinosa  |                                                                   |
| HbPAL2 | CAAT-box    | CAAT   | 819  | 4 | - | Nicotiana glutinosa  |                                                                   |
| HbPAL2 | CAAT-box    | CAAT   | 911  | 4 | + | Nicotiana glutinosa  |                                                                   |
| HbPAL2 | CAAT-box    | CAAT   | 947  | 4 | + | Nicotiana glutinosa  |                                                                   |
| HbPAL2 | CAAT-box    | CAAT   | 954  | 4 | - | Nicotiana glutinosa  |                                                                   |
| HbPAL2 | CAAT-box    | CAAAT  | 1042 | 5 | + | Pisum sativum        | common cis-acting element in promoter and enhancer regions        |
| HbPAL2 | CAAT-box    | CAAAT  | 1062 | 5 | + | Pisum sativum        | common cis-acting element in promoter and enhancer regions        |
| HbPAL2 | CAAT-box    | CAAAT  | 1065 | 5 | - | Pisum sativum        | common cis-acting element in promoter and enhancer regions        |
| HbPAL2 | CAAT-box    | CAAT   | 1111 | 4 | + | Nicotiana glutinosa  |                                                                   |
| HbPAL2 | CAAT-box    | CAAT   | 1119 | 4 | - | Nicotiana glutinosa  |                                                                   |
| HbPAL2 | CAAT-box    | CAAAT  | 1312 | 5 | + | Pisum sativum        | common cis-acting element in promoter and enhancer regions        |
| HbPAL2 | CAAT-box    | CAAT   | 1380 | 4 | + | Nicotiana glutinosa  |                                                                   |
| HbPAL2 | CAAT-box    | CAAT   | 1493 | 4 | - | Nicotiana glutinosa  |                                                                   |
| HbPAL2 | CAAT-box    | CAAT   | 1518 | 4 | + | Nicotiana glutinosa  |                                                                   |
| HbPAL2 | CAAT-box    | CAAT   | 1602 | 4 | + | Nicotiana glutinosa  |                                                                   |
| HbPAL2 | CAAT-box    | CAAAT  | 1671 | 5 | + | Pisum sativum        | common cis-acting element in promoter and enhancer regions        |
| HbPAL2 | CAAT-box    | CAAT   | 1707 | 4 | + | Nicotiana glutinosa  |                                                                   |
| HbPAL2 | CAAT-box    | CAAT   | 1735 | 4 | + | Nicotiana glutinosa  |                                                                   |
| HbPAL2 | CAAT-box    | CAAT   | 1970 | 4 | - | Nicotiana glutinosa  |                                                                   |
| HbPAL2 | CAT-box     | GCCACT | 1740 | 6 | + | Arabidopsis thaliana | cis-acting regulatory element related to meristem expression      |
| HbPAL2 | CGTCA-motif | CGTCA  | 39   | 5 | + | Hordeum vulgare      | cis-acting regulatory element involved in the MeJA-responsiveness |

|        |             |             |      |    |   |                            |                                                                |
|--------|-------------|-------------|------|----|---|----------------------------|----------------------------------------------------------------|
| HbPAL2 | chs-CMA2a   | TCACTTGA    | 635  | 8  | + | Petroselinum crispum       | part of a light responsive element                             |
| HbPAL2 | circadian   | CAAAGATATC  | 1276 | 9  | + | Lycopersicon<br>esculentum | cis-acting regulatory element involved in circadian control    |
| HbPAL2 | circadian   | CAAAGATATC  | 1897 | 9  | + | Lycopersicon<br>esculentum | cis-acting regulatory element involved in circadian control    |
| HbPAL2 | ERE         | ATTTTAAA    | 13   | 8  | + | Nicotiana glutinos         | ethylene-responsive element                                    |
| HbPAL2 | ERE         | ATTTTAAA    | 154  | 8  | + | Nicotiana glutinos         | ethylene-responsive element                                    |
| HbPAL2 | ERE         | ATTTTAAA    | 615  | 8  | + | Nicotiana glutinos         | ethylene-responsive element                                    |
| HbPAL2 | GA-motif    | ATAGATAA    | 1400 | 8  | - | Arabidopsis thaliana       | part of a light responsive element                             |
| HbPAL2 | GA-motif    | ATAGATAA    | 1476 | 8  | + | Arabidopsis thaliana       | part of a light responsive element                             |
| HbPAL2 | GARE-motif  | TCTGTTG     | 1345 | 7  | + | Brassica oleracea          | gibberellin-responsive element                                 |
| HbPAL2 | GATA-motif  | GATAGGA     | 201  | 7  | + | Arabidopsis thaliana       | part of a light responsive element                             |
| HbPAL2 | GATA-motif  | AAGGATAAGG  | 1785 | 9  | - | Solanum tuberosum          | part of a light responsive element                             |
| HbPAL2 | GATA-motif  | GATAGGA     | 1905 | 7  | - | Arabidopsis thaliana       | part of a light responsive element                             |
| HbPAL2 | G-Box       | CACGTG      | 62   | 6  | + | Pisum sativum              | cis-acting regulatory element involved in light responsiveness |
| HbPAL2 | G-box       | CACGTG      | 62   | 6  | + | Arabidopsis thaliana       | cis-acting regulatory element involved in light responsiveness |
| HbPAL2 | G-box       | TACGTG      | 1531 | 6  | + | Arabidopsis thaliana       | cis-acting regulatory element involved in light responsiveness |
| HbPAL2 | GT1-motif   | GGTTAAT     | 1463 | 7  | + | Avena sativa               | light responsive element                                       |
| HbPAL2 | I-box       | cCATATCCAAT | 642  | 10 | + | Flaveria trinervia         | part of a light responsive element                             |
| HbPAL2 | MBS         | CAACTG      | 1625 | 6  | - | Arabidopsis thaliana       | MYB binding site involved in drought-inducibility              |
| HbPAL2 | Myb         | CAACTG      | 1625 | 6  | - | Arabidopsis thaliana       | MYB binding site                                               |
| HbPAL2 | Myb         | TAACTG      | 1976 | 6  | + | Arabidopsis thaliana       | MYB binding site                                               |
| HbPAL2 | MYB         | CAACAG      | 1346 | 6  | - | Arabidopsis thaliana       | MYB binding site                                               |
| HbPAL2 | MYB         | CAACCA      | 1636 | 6  | + | Arabidopsis thaliana       | MYB binding site                                               |
| HbPAL2 | MYB         | CAACCA      | 1755 | 6  | + | Arabidopsis thaliana       | MYB binding site                                               |
| HbPAL2 | Myb-binding | CAACAG      | 1346 | 6  | - | Nicotiana tabacum          | MYB binding site                                               |

| site   |          |          |      |   |   |                      |                                                         |
|--------|----------|----------|------|---|---|----------------------|---------------------------------------------------------|
| HbPAL2 | Myc      | TCTCTTA  | 811  | 7 | + | Arabidopsis thaliana | MYC binding site                                        |
| HbPAL2 | Myc      | TCTCTTA  | 1917 | 7 | + | Arabidopsis thaliana | MYC binding site                                        |
| HbPAL2 | MYC      | CATGTG   | 1295 | 6 | - | Arabidopsis thaliana | MYC binding site                                        |
| HbPAL2 | P-box    | CCTTTTG  | 325  | 7 | - | Oryza sativa         | gibberellin-responsive element                          |
| HbPAL2 | STRE     | AGGGG    | 329  | 5 | + | Arabidopsis thaliana |                                                         |
| HbPAL2 | TATA-box | ATATAA   | 55   | 6 | + | Brassica oleracea    | core promoter element around -30 of transcription start |
| HbPAL2 | TATA-box | TATA     | 56   | 4 | + | Arabidopsis thaliana | core promoter element around -30 of transcription start |
| HbPAL2 | TATA-box | ATATAT   | 74   | 6 | + | Brassica napus       | core promoter element around -30 of transcription start |
| HbPAL2 | TATA-box | TATA     | 75   | 4 | + | Arabidopsis thaliana | core promoter element around -30 of transcription start |
| HbPAL2 | TATA-box | ATTATA   | 96   | 6 | + | Brassica napus       | core promoter element around -30 of transcription start |
| HbPAL2 | TATA-box | TATATAA  | 97   | 7 | - | Arabidopsis thaliana | core promoter element around -30 of transcription start |
| HbPAL2 | TATA-box | TATATA   | 98   | 6 | + | Arabidopsis thaliana | core promoter element around -30 of transcription start |
| HbPAL2 | TATA-box | ATATAT   | 99   | 6 | + | Brassica napus       | core promoter element around -30 of transcription start |
| HbPAL2 | TATA-box | TATA     | 100  | 4 | + | Arabidopsis thaliana | core promoter element around -30 of transcription start |
| HbPAL2 | TATA-box | TATAA    | 106  | 5 | - | Arabidopsis thaliana | core promoter element around -30 of transcription start |
| HbPAL2 | TATA-box | TATA     | 107  | 4 | + | Arabidopsis thaliana | core promoter element around -30 of transcription start |
| HbPAL2 | TATA-box | TATA     | 134  | 4 | + | Arabidopsis thaliana | core promoter element around -30 of transcription start |
| HbPAL2 | TATA-box | TATTTAAA | 156  | 8 | - | Arabidopsis thaliana | core promoter element around -30 of transcription start |
| HbPAL2 | TATA-box | ATATAA   | 161  | 6 | + | Brassica oleracea    | core promoter element around -30 of transcription start |
| HbPAL2 | TATA-box | TATA     | 162  | 4 | + | Arabidopsis thaliana | core promoter element around -30 of transcription start |
| HbPAL2 | TATA-box | TATAAATA | 231  | 8 | - | Daucus carota        | core promoter element around -30 of transcription start |
| HbPAL2 | TATA-box | TATAAAT  | 232  | 7 | - | Brassica juncea      | core promoter element around -30 of transcription start |
| HbPAL2 | TATA-box | TATAAA   | 233  | 6 | - | Helianthus annuus    | core promoter element around -30 of transcription start |
| HbPAL2 | TATA-box | TATAA    | 234  | 5 | - | Arabidopsis thaliana | core promoter element around -30 of transcription start |
| HbPAL2 | TATA-box | TATA     | 235  | 4 | + | Arabidopsis thaliana | core promoter element around -30 of transcription start |



|        |          |              |      |    |   |                      |                                                         |
|--------|----------|--------------|------|----|---|----------------------|---------------------------------------------------------|
| HbPAL2 | TATA-box | TATAAGAA     | 262  | 8  | - | Zea mays             | core promoter element around -30 of transcription start |
| HbPAL2 | TATA-box | TATAA        | 265  | 5  | - | Arabidopsis thaliana | core promoter element around -30 of transcription start |
| HbPAL2 | TATA-box | TATA         | 266  | 4  | + | Arabidopsis thaliana | core promoter element around -30 of transcription start |
| HbPAL2 | TATA-box | TATA         | 358  | 4  | + | Arabidopsis thaliana | core promoter element around -30 of transcription start |
| HbPAL2 | TATA-box | TATAAAA      | 366  | 7  | - | Pisum sativum        | core promoter element around -30 of transcription start |
| HbPAL2 | TATA-box | TATAAA       | 367  | 6  | - | Helianthus annuus    | core promoter element around -30 of transcription start |
| HbPAL2 | TATA-box | TATAA        | 368  | 5  | - | Arabidopsis thaliana | core promoter element around -30 of transcription start |
| HbPAL2 | TATA-box | TATA         | 369  | 4  | + | Arabidopsis thaliana | core promoter element around -30 of transcription start |
| HbPAL2 | TATA-box | ATATAA       | 585  | 6  | + | Brassica oleracea    | core promoter element around -30 of transcription start |
| HbPAL2 | TATA-box | TATA         | 586  | 4  | + | Arabidopsis thaliana | core promoter element around -30 of transcription start |
| HbPAL2 | TATA-box | TATA         | 723  | 4  | + | Arabidopsis thaliana | core promoter element around -30 of transcription start |
| HbPAL2 | TATA-box | TATA         | 981  | 4  | + | Arabidopsis thaliana | core promoter element around -30 of transcription start |
| HbPAL2 | TATA-box | ccTATAAAaa   | 997  | 9  | + | Arabidopsis thaliana | core promoter element around -30 of transcription start |
| HbPAL2 | TATA-box | TATA         | 999  | 4  | - | Arabidopsis thaliana | core promoter element around -30 of transcription start |
| HbPAL2 | TATA-box | ATATAT       | 1113 | 6  | - | Brassica napus       | core promoter element around -30 of transcription start |
| HbPAL2 | TATA-box | TATATA       | 1114 | 6  | - | Arabidopsis thaliana | core promoter element around -30 of transcription start |
| HbPAL2 | TATA-box | ATATAT       | 1115 | 6  | - | Brassica napus       | core promoter element around -30 of transcription start |
| HbPAL2 | TATA-box | TATA         | 1116 | 4  | - | Arabidopsis thaliana | core promoter element around -30 of transcription start |
| HbPAL2 | TATA-box | TATAAAA      | 1131 | 7  | - | Pisum sativum        | core promoter element around -30 of transcription start |
| HbPAL2 | TATA-box | TATAAA       | 1132 | 6  | - | Helianthus annuus    | core promoter element around -30 of transcription start |
| HbPAL2 | TATA-box | TATATAA      | 1133 | 7  | - | Arabidopsis thaliana | core promoter element around -30 of transcription start |
| HbPAL2 | TATA-box | TATATTATATTT | 1134 | 12 | + | Avena sativa         | core promoter element around -30 of transcription start |
| HbPAL2 | TATA-box | ATATAT       | 1135 | 6  | - | Brassica napus       | core promoter element around -30 of transcription start |
| HbPAL2 | TATA-box | TATATA       | 1136 | 6  | - | Arabidopsis thaliana | core promoter element around -30 of transcription start |
| HbPAL2 | TATA-box | ATATAT       | 1137 | 6  | - | Brassica napus       | core promoter element around -30 of transcription start |
| HbPAL2 | TATA-box | TATATA       | 1138 | 6  | - | Arabidopsis thaliana | core promoter element around -30 of transcription start |

|        |          |            |      |   |   |                      |                                                         |
|--------|----------|------------|------|---|---|----------------------|---------------------------------------------------------|
| HbPAL2 | TATA-box | ATATAT     | 1139 | 6 | - | Brassica napus       | core promoter element around -30 of transcription start |
| HbPAL2 | TATA-box | TATA       | 1140 | 4 | - | Arabidopsis thaliana | core promoter element around -30 of transcription start |
| HbPAL2 | TATA-box | TATAAAA    | 1145 | 7 | - | Pisum sativum        | core promoter element around -30 of transcription start |
| HbPAL2 | TATA-box | TATAAA     | 1146 | 6 | - | Helianthus annuus    | core promoter element around -30 of transcription start |
| HbPAL2 | TATA-box | TATAA      | 1147 | 5 | - | Arabidopsis thaliana | core promoter element around -30 of transcription start |
| HbPAL2 | TATA-box | TATA       | 1148 | 4 | - | Arabidopsis thaliana | core promoter element around -30 of transcription start |
| HbPAL2 | TATA-box | TATATAA    | 1197 | 7 | - | Arabidopsis thaliana | core promoter element around -30 of transcription start |
| HbPAL2 | TATA-box | TATATA     | 1198 | 6 | - | Arabidopsis thaliana | core promoter element around -30 of transcription start |
| HbPAL2 | TATA-box | ATATAT     | 1199 | 6 | - | Brassica napus       | core promoter element around -30 of transcription start |
| HbPAL2 | TATA-box | TATA       | 1200 | 4 | - | Arabidopsis thaliana | core promoter element around -30 of transcription start |
| HbPAL2 | TATA-box | TATACA     | 1321 | 6 | - | Helianthus annuus    | core promoter element around -30 of transcription start |
| HbPAL2 | TATA-box | TATA       | 1323 | 4 | - | Arabidopsis thaliana | core promoter element around -30 of transcription start |
| HbPAL2 | TATA-box | ATTATA     | 1483 | 6 | + | Brassica napus       | core promoter element around -30 of transcription start |
| HbPAL2 | TATA-box | TATAA      | 1484 | 5 | - | Arabidopsis thaliana | core promoter element around -30 of transcription start |
| HbPAL2 | TATA-box | TATA       | 1485 | 4 | - | Arabidopsis thaliana | core promoter element around -30 of transcription start |
| HbPAL2 | TATA-box | taTATAAAtc | 1500 | 9 | - | Arabidopsis thaliana | core promoter element around -30 of transcription start |
| HbPAL2 | TATA-box | ATTATA     | 1502 | 6 | + | Brassica napus       | core promoter element around -30 of transcription start |
| HbPAL2 | TATA-box | TATATAA    | 1503 | 7 | - | Arabidopsis thaliana | core promoter element around -30 of transcription start |
| HbPAL2 | TATA-box | TATATA     | 1504 | 6 | - | Arabidopsis thaliana | core promoter element around -30 of transcription start |
| HbPAL2 | TATA-box | ATATAT     | 1505 | 6 | - | Brassica napus       | core promoter element around -30 of transcription start |
| HbPAL2 | TATA-box | TATA       | 1506 | 4 | - | Arabidopsis thaliana | core promoter element around -30 of transcription start |
| HbPAL2 | TATA-box | TATACA     | 1535 | 6 | - | Helianthus annuus    | core promoter element around -30 of transcription start |
| HbPAL2 | TATA-box | TATA       | 1537 | 4 | - | Arabidopsis thaliana | core promoter element around -30 of transcription start |
| HbPAL2 | TATA-box | TATTTAAA   | 1845 | 8 | + | Arabidopsis thaliana | core promoter element around -30 of transcription start |
| HbPAL2 | TATA-box | TATAAA     | 1940 | 6 | - | Helianthus annuus    | core promoter element around -30 of transcription start |
| HbPAL2 | TATA-box | TATAA      | 1941 | 5 | - | Arabidopsis thaliana | core promoter element around -30 of transcription start |

|        |             |              |      |    |   |                      |                                                                     |
|--------|-------------|--------------|------|----|---|----------------------|---------------------------------------------------------------------|
| HbPAL2 | TATA-box    | TATA         | 1942 | 4  | - | Arabidopsis thaliana | core promoter element around -30 of transcription start             |
| HbPAL2 | TCCC-motif  | TCTCCCT      | 1771 | 7  | + | Spinacia oleracea    | part of a light responsive element                                  |
| HbPAL2 | TCT-motif   | TCTTAC       | 813  | 6  | + | Arabidopsis thaliana | part of a light responsive element                                  |
| HbPAL2 | TCT-motif   | TCTTAC       | 1241 | 6  | + | Arabidopsis thaliana | part of a light responsive element                                  |
| HbPAL2 | TGACG-motif | TGACG        | 39   | 5  | - | Hordeum vulgare      | cis-acting regulatory element involved in the MeJA-responsiveness   |
| HbPAL2 | W box       | TTGACC       | 783  | 6  | + | Arabidopsis thaliana | WRKY binding site                                                   |
| HbPAL2 | WRE3        | CCACCT       | 347  | 6  | + | Pisum sativum        | wound-responsive element                                            |
| HbPAL2 | WUN-motif   | TAATTACTC    | 543  | 9  | + | Nicotiana glutinosa  | wound-responsive element                                            |
| HbPAL3 | AAGAA-motif | GAAAGAA      | 405  | 7  | + | Avena sativa         |                                                                     |
| HbPAL3 | ABRE        | ACGTG        | 499  | 5  | - | Arabidopsis thaliana | cis-acting element involved in the abscisic acid responsiveness     |
| HbPAL3 | ABRE        | CACGTG       | 911  | 6  | + | Arabidopsis thaliana | cis-acting element involved in the abscisic acid responsiveness     |
| HbPAL3 | ABRE        | ACGTG        | 912  | 5  | + | Arabidopsis thaliana | cis-acting element involved in the abscisic acid responsiveness     |
| HbPAL3 | ABRE        | TACGTGTC     | 1714 | 8  | + | Oryza sativa         | cis-acting element involved in the abscisic acid responsiveness     |
| HbPAL3 | ABRE        | ACGTG        | 1715 | 5  | + | Arabidopsis thaliana | cis-acting element involved in the abscisic acid responsiveness     |
| HbPAL3 | ABRE3a      | TACGTG       | 1714 | 6  | + | Zea mays             | cis-acting element involved in the abscisic acid responsiveness     |
| HbPAL3 | ABRE4       | CACGTA       | 1714 | 6  | - | Zea mays             | cis-acting element involved in the abscisic acid responsiveness     |
| HbPAL3 | ACE         | GACACGTATG   | 1712 | 9  | - | Petroselinum crispum | cis-acting element involved in light responsiveness                 |
| HbPAL3 | AC-II       | TCACCAACCCCC | 512  | 11 | - | Populus tremuloides  |                                                                     |
| HbPAL3 | AE-box      | AGAAACTT     | 1897 | 8  | - | Arabidopsis thaliana | part of a module for light response                                 |
| HbPAL3 | ARE         | AAACCA       | 1247 | 6  | + | Zea mays             | cis-acting regulatory element essential for the anaerobic induction |
| HbPAL3 | as-1        | TGACG        | 671  | 5  | + | Arabidopsis thaliana |                                                                     |
| HbPAL3 | as-1        | TGACG        | 1671 | 5  | + | Arabidopsis thaliana |                                                                     |
| HbPAL3 | AT~ABRE     | TACGTGTC     | 1714 | 8  | + | Arabidopsis thaliana |                                                                     |
| HbPAL3 | AT~TATA-box | TATATA       | 827  | 6  | + | Arabidopsis thaliana |                                                                     |
| HbPAL3 | AT~TATA-box | TATATA       | 1165 | 6  | - | Arabidopsis thaliana |                                                                     |
| HbPAL3 | AT~TATA-box | TATATA       | 1334 | 6  | - | Arabidopsis thaliana |                                                                     |

|        |           |              |      |    |   |                      |                                                                 |
|--------|-----------|--------------|------|----|---|----------------------|-----------------------------------------------------------------|
| HbPAL3 | AT1-motif | AATTATTTTATT | 876  | 13 | + | Solanum tuberosum    | part of a light responsive module                               |
| HbPAL3 | Box 4     | ATTAAT       | 182  | 6  | + | Petroselinum crispum | part of a conserved DNA module involved in light responsiveness |
| HbPAL3 | Box 4     | ATTAAT       | 306  | 6  | + | Petroselinum crispum | part of a conserved DNA module involved in light responsiveness |
| HbPAL3 | Box 4     | ATTAAT       | 326  | 6  | + | Petroselinum crispum | part of a conserved DNA module involved in light responsiveness |
| HbPAL3 | Box 4     | ATTAAT       | 472  | 6  | + | Petroselinum crispum | part of a conserved DNA module involved in light responsiveness |
| HbPAL3 | Box 4     | ATTAAT       | 836  | 6  | + | Petroselinum crispum | part of a conserved DNA module involved in light responsiveness |
| HbPAL3 | Box 4     | ATTAAT       | 926  | 6  | + | Petroselinum crispum | part of a conserved DNA module involved in light responsiveness |
| HbPAL3 | Box 4     | ATTAAT       | 1018 | 6  | - | Petroselinum crispum | part of a conserved DNA module involved in light responsiveness |
| HbPAL3 | Box 4     | ATTAAT       | 1154 | 6  | - | Petroselinum crispum | part of a conserved DNA module involved in light responsiveness |
| HbPAL3 | Box 4     | ATTAAT       | 1377 | 6  | - | Petroselinum crispum | part of a conserved DNA module involved in light responsiveness |
| HbPAL3 | CAAT-box  | CAAT         | 60   | 4  | + | Nicotiana glutinosa  |                                                                 |
| HbPAL3 | CAAT-box  | CAAT         | 72   | 4  | + | Nicotiana glutinosa  |                                                                 |
| HbPAL3 | CAAT-box  | CAAAT        | 107  | 5  | - | Pisum sativum        | common cis-acting element in promoter and enhancer regions      |
| HbPAL3 | CAAT-box  | CAAT         | 157  | 4  | - | Nicotiana glutinosa  |                                                                 |
| HbPAL3 | CAAT-box  | CAAT         | 161  | 4  | + | Nicotiana glutinosa  |                                                                 |
| HbPAL3 | CAAT-box  | CAAAT        | 189  | 5  | - | Pisum sativum        | common cis-acting element in promoter and enhancer regions      |
| HbPAL3 | CAAT-box  | CAAT         | 254  | 4  | - | Nicotiana glutinosa  |                                                                 |
| HbPAL3 | CAAT-box  | CAAT         | 259  | 4  | + | Nicotiana glutinosa  |                                                                 |
| HbPAL3 | CAAT-box  | CAAT         | 267  | 4  | - | Nicotiana glutinosa  |                                                                 |
| HbPAL3 | CAAT-box  | CAAAT        | 303  | 5  | + | Pisum sativum        | common cis-acting element in promoter and enhancer regions      |
| HbPAL3 | CAAT-box  | CAAT         | 310  | 4  | - | Nicotiana glutinosa  |                                                                 |
| HbPAL3 | CAAT-box  | CAAT         | 347  | 4  | - | Nicotiana glutinosa  |                                                                 |
| HbPAL3 | CAAT-box  | CAAAT        | 387  | 5  | + | Pisum sativum        | common cis-acting element in promoter and enhancer regions      |
| HbPAL3 | CAAT-box  | CAAAT        | 464  | 5  | - | Pisum sativum        | common cis-acting element in promoter and enhancer regions      |
| HbPAL3 | CAAT-box  | CAAT         | 527  | 4  | + | Nicotiana glutinosa  |                                                                 |
| HbPAL3 | CAAT-box  | CAAT         | 532  | 4  | + | Nicotiana glutinosa  |                                                                 |

|        |             |             |      |    |   |                      |                                                                   |
|--------|-------------|-------------|------|----|---|----------------------|-------------------------------------------------------------------|
| HbPAL3 | CAAT-box    | CAAAT       | 547  | 5  | + | Pisum sativum        | common cis-acting element in promoter and enhancer regions        |
| HbPAL3 | CAAT-box    | CAAT        | 570  | 4  | - | Nicotiana glutinosa  |                                                                   |
| HbPAL3 | CAAT-box    | CAAAT       | 591  | 5  | - | Pisum sativum        | common cis-acting element in promoter and enhancer regions        |
| HbPAL3 | CAAT-box    | CAAT        | 637  | 4  | + | Nicotiana glutinosa  |                                                                   |
| HbPAL3 | CAAT-box    | CAAT        | 717  | 4  | + | Nicotiana glutinosa  |                                                                   |
| HbPAL3 | CAAT-box    | CAAAT       | 719  | 5  | - | Pisum sativum        | common cis-acting element in promoter and enhancer regions        |
| HbPAL3 | CAAT-box    | CAAT        | 735  | 4  | + | Nicotiana glutinosa  |                                                                   |
| HbPAL3 | CAAT-box    | CAAT        | 796  | 4  | - | Nicotiana glutinosa  |                                                                   |
| HbPAL3 | CAAT-box    | CAAT        | 816  | 4  | - | Nicotiana glutinosa  |                                                                   |
| HbPAL3 | CAAT-box    | CAAT        | 1006 | 4  | - | Nicotiana glutinosa  |                                                                   |
| HbPAL3 | CAAT-box    | CAAAT       | 1050 | 5  | + | Pisum sativum        | common cis-acting element in promoter and enhancer regions        |
| HbPAL3 | CAAT-box    | CAAAT       | 1088 | 5  | + | Pisum sativum        | common cis-acting element in promoter and enhancer regions        |
| HbPAL3 | CAAT-box    | CCAAT       | 1124 | 5  | + | Arabidopsis thaliana | common cis-acting element in promoter and enhancer regions        |
| HbPAL3 | CAAT-box    | CAAT        | 1125 | 4  | + | Nicotiana glutinosa  |                                                                   |
| HbPAL3 | CAAT-box    | CAAAT       | 1286 | 5  | - | Pisum sativum        | common cis-acting element in promoter and enhancer regions        |
| HbPAL3 | CAAT-box    | CAAAT       | 1406 | 5  | - | Pisum sativum        | common cis-acting element in promoter and enhancer regions        |
| HbPAL3 | CAAT-box    | CAAAT       | 1486 | 5  | + | Pisum sativum        | common cis-acting element in promoter and enhancer regions        |
| HbPAL3 | CAAT-box    | CAAAT       | 1544 | 5  | - | Pisum sativum        | common cis-acting element in promoter and enhancer regions        |
| HbPAL3 | CAAT-box    | CAAT        | 1608 | 4  | - | Nicotiana glutinosa  |                                                                   |
| HbPAL3 | CAAT-box    | CAACCAACTCC | 1656 | 10 | + | Arabidopsis thaliana | common cis-acting element in promoter and enhancer regions        |
| HbPAL3 | CAAT-box    | CCAAT       | 1665 | 5  | + | Arabidopsis thaliana | common cis-acting element in promoter and enhancer regions        |
| HbPAL3 | CAAT-box    | CAAT        | 1666 | 4  | + | Nicotiana glutinosa  |                                                                   |
| HbPAL3 | CAAT-box    | CAAAT       | 1668 | 5  | - | Pisum sativum        | common cis-acting element in promoter and enhancer regions        |
| HbPAL3 | CAAT-box    | CAAT        | 1721 | 4  | + | Nicotiana glutinosa  |                                                                   |
| HbPAL3 | CAAT-box    | CAAT        | 1854 | 4  | + | Nicotiana glutinosa  |                                                                   |
| HbPAL3 | CGTCA-motif | CGTCA       | 671  | 5  | - | Hordeum vulgare      | cis-acting regulatory element involved in the MeJA-responsiveness |

|        |                  |                |      |   |   |                      |                                                                   |
|--------|------------------|----------------|------|---|---|----------------------|-------------------------------------------------------------------|
| HbPAL3 | CGTCA-motif      | CGTCA          | 1671 | 5 | - | Hordeum vulgare      | cis-acting regulatory element involved in the MeJA-responsiveness |
| HbPAL3 | CTAG-motif       | ACTAGCAGAA     | 1239 | 9 | + | Avena sativa         |                                                                   |
| HbPAL3 | ERE              | ATTTTAAA       | 124  | 8 | + | Nicotiana glutinos   | ethylene-responsive element                                       |
| HbPAL3 | ERE              | ATTTTAAA       | 1363 | 8 | + | Nicotiana glutinos   | ethylene-responsive element                                       |
| HbPAL3 | ERE              | ATTTTAAA       | 1524 | 8 | - | Nicotiana glutinos   | ethylene-responsive element                                       |
| HbPAL3 | ERE              | ATTTTAAA       | 1593 | 8 | - | Nicotiana glutinos   | ethylene-responsive element                                       |
| HbPAL3 | Gap-box          | CAAATGAA(A/G)A | 387  | 9 | + | Arabidopsis thaliana | part of a light responsive element                                |
| HbPAL3 | GATA-motif       | AAGGATAAGG     | 485  | 9 | + | Solanum tuberosum    | part of a light responsive element                                |
| HbPAL3 | G-Box            | CACGTT         | 499  | 6 | + | Pisum sativum        | cis-acting regulatory element involved in light responsiveness    |
| HbPAL3 | G-Box            | CACGTG         | 911  | 6 | + | Pisum sativum        | cis-acting regulatory element involved in light responsiveness    |
| HbPAL3 | G-box            | CACGTG         | 911  | 6 | + | Arabidopsis thaliana | cis-acting regulatory element involved in light responsiveness    |
| HbPAL3 | G-box            | TAACACGTAG     | 1713 | 9 | - | Brassica oleracea    | cis-acting regulatory element involved in light responsiveness    |
| HbPAL3 | G-box            | TACGTG         | 1714 | 6 | + | Arabidopsis thaliana | cis-acting regulatory element involved in light responsiveness    |
| HbPAL3 | I-box            | gGATAAGGTG     | 487  | 9 | + | Zea mays             | part of a light responsive element                                |
| HbPAL3 | MYB              | CAACCA         | 538  | 6 | + | Arabidopsis thaliana | MYB binding site                                                  |
| HbPAL3 | MYB              | CAACAG         | 1948 | 6 | - | Arabidopsis thaliana | MYB binding site                                                  |
| HbPAL3 | Myb-binding site | CAACAG         | 1948 | 6 | - | Nicotiana tabacum    | MYB binding site                                                  |
| HbPAL3 | MYC              | CATTG          | 387  | 6 | - | Arabidopsis thaliana | MYC binding site                                                  |
| HbPAL3 | STRE             | AGGGG          | 1945 | 5 | - | Arabidopsis thaliana |                                                                   |
| HbPAL3 | TATA             | TATAAAAT       | 231  | 8 | - | Arabidopsis thaliana |                                                                   |
| HbPAL3 | TATA             | TATAAAAT       | 1184 | 8 | + | Arabidopsis thaliana |                                                                   |
| HbPAL3 | TATA-box         | ATTATA         | 62   | 6 | + | Brassica napus       | core promoter element around -30 of transcription start           |
| HbPAL3 | TATA-box         | TATAA          | 63   | 5 | - | Arabidopsis thaliana | core promoter element around -30 of transcription start           |
| HbPAL3 | TATA-box         | TATA           | 64   | 4 | + | Arabidopsis thaliana | core promoter element around -30 of transcription start           |
| HbPAL3 | TATA-box         | ATTATA         | 86   | 6 | + | Brassica napus       | core promoter element around -30 of transcription start           |

|        |          |          |     |   |   |                      |                                                         |
|--------|----------|----------|-----|---|---|----------------------|---------------------------------------------------------|
| HbPAL3 | TATA-box | TATAA    | 87  | 5 | - | Arabidopsis thaliana | core promoter element around -30 of transcription start |
| HbPAL3 | TATA-box | TATA     | 88  | 4 | + | Arabidopsis thaliana | core promoter element around -30 of transcription start |
| HbPAL3 | TATA-box | ATATAA   | 114 | 6 | + | Brassica oleracea    | core promoter element around -30 of transcription start |
| HbPAL3 | TATA-box | TATA     | 115 | 4 | + | Arabidopsis thaliana | core promoter element around -30 of transcription start |
| HbPAL3 | TATA-box | TATTTAAA | 126 | 8 | - | Arabidopsis thaliana | core promoter element around -30 of transcription start |
| HbPAL3 | TATA-box | TATA     | 135 | 4 | + | Arabidopsis thaliana | core promoter element around -30 of transcription start |
| HbPAL3 | TATA-box | ATTATA   | 151 | 6 | + | Brassica napus       | core promoter element around -30 of transcription start |
| HbPAL3 | TATA-box | TATAA    | 152 | 5 | - | Arabidopsis thaliana | core promoter element around -30 of transcription start |
| HbPAL3 | TATA-box | TATA     | 153 | 4 | + | Arabidopsis thaliana | core promoter element around -30 of transcription start |
| HbPAL3 | TATA-box | ATTATA   | 163 | 6 | + | Brassica napus       | core promoter element around -30 of transcription start |
| HbPAL3 | TATA-box | TATAA    | 164 | 5 | - | Arabidopsis thaliana | core promoter element around -30 of transcription start |
| HbPAL3 | TATA-box | TATA     | 165 | 4 | + | Arabidopsis thaliana | core promoter element around -30 of transcription start |
| HbPAL3 | TATA-box | ATATAA   | 196 | 6 | + | Brassica oleracea    | core promoter element around -30 of transcription start |
| HbPAL3 | TATA-box | TATA     | 197 | 4 | + | Arabidopsis thaliana | core promoter element around -30 of transcription start |
| HbPAL3 | TATA-box | TATAAAA  | 211 | 7 | - | Pisum sativum        | core promoter element around -30 of transcription start |
| HbPAL3 | TATA-box | TATAAA   | 212 | 6 | - | Helianthus annuus    | core promoter element around -30 of transcription start |
| HbPAL3 | TATA-box | TATAA    | 213 | 5 | - | Arabidopsis thaliana | core promoter element around -30 of transcription start |
| HbPAL3 | TATA-box | TATA     | 214 | 4 | + | Arabidopsis thaliana | core promoter element around -30 of transcription start |
| HbPAL3 | TATA-box | TATAAAA  | 232 | 7 | - | Pisum sativum        | core promoter element around -30 of transcription start |
| HbPAL3 | TATA-box | TATAAA   | 233 | 6 | - | Helianthus annuus    | core promoter element around -30 of transcription start |
| HbPAL3 | TATA-box | TATAA    | 234 | 5 | - | Arabidopsis thaliana | core promoter element around -30 of transcription start |
| HbPAL3 | TATA-box | TATA     | 235 | 4 | + | Arabidopsis thaliana | core promoter element around -30 of transcription start |
| HbPAL3 | TATA-box | ATATAA   | 271 | 6 | + | Brassica oleracea    | core promoter element around -30 of transcription start |
| HbPAL3 | TATA-box | TATA     | 272 | 4 | + | Arabidopsis thaliana | core promoter element around -30 of transcription start |
| HbPAL3 | TATA-box | TACAAAA  | 398 | 7 | + | Oryza sativa         | core promoter element around -30 of transcription start |
| HbPAL3 | TATA-box | ATATAT   | 644 | 6 | + | Brassica napus       | core promoter element around -30 of transcription start |



|        |          |          |     |   |   |                      |                                                         |
|--------|----------|----------|-----|---|---|----------------------|---------------------------------------------------------|
| HbPAL3 | TATA-box | TATA     | 645 | 4 | + | Arabidopsis thaliana | core promoter element around -30 of transcription start |
| HbPAL3 | TATA-box | ATATAT   | 826 | 6 | + | Brassica napus       | core promoter element around -30 of transcription start |
| HbPAL3 | TATA-box | TATATA   | 827 | 6 | + | Arabidopsis thaliana | core promoter element around -30 of transcription start |
| HbPAL3 | TATA-box | ATATAA   | 828 | 6 | + | Brassica oleracea    | core promoter element around -30 of transcription start |
| HbPAL3 | TATA-box | TATA     | 829 | 4 | + | Arabidopsis thaliana | core promoter element around -30 of transcription start |
| HbPAL3 | TATA-box | ATATAA   | 852 | 6 | + | Brassica oleracea    | core promoter element around -30 of transcription start |
| HbPAL3 | TATA-box | TATA     | 853 | 4 | + | Arabidopsis thaliana | core promoter element around -30 of transcription start |
| HbPAL3 | TATA-box | ATATAA   | 857 | 6 | + | Brassica oleracea    | core promoter element around -30 of transcription start |
| HbPAL3 | TATA-box | TATA     | 858 | 4 | + | Arabidopsis thaliana | core promoter element around -30 of transcription start |
| HbPAL3 | TATA-box | ATATAA   | 872 | 6 | + | Brassica oleracea    | core promoter element around -30 of transcription start |
| HbPAL3 | TATA-box | TATA     | 873 | 4 | + | Arabidopsis thaliana | core promoter element around -30 of transcription start |
| HbPAL3 | TATA-box | TACATAAA | 884 | 8 | - | Oryza sativa         | core promoter element around -30 of transcription start |
| HbPAL3 | TATA-box | TATACA   | 888 | 6 | - | Helianthus annuus    | core promoter element around -30 of transcription start |
| HbPAL3 | TATA-box | TATA     | 890 | 4 | + | Arabidopsis thaliana | core promoter element around -30 of transcription start |
| HbPAL3 | TATA-box | ATATAT   | 897 | 6 | + | Brassica napus       | core promoter element around -30 of transcription start |
| HbPAL3 | TATA-box | TATA     | 898 | 4 | + | Arabidopsis thaliana | core promoter element around -30 of transcription start |
| HbPAL3 | TATA-box | ATTATA   | 930 | 6 | + | Brassica napus       | core promoter element around -30 of transcription start |
| HbPAL3 | TATA-box | TATAA    | 931 | 5 | - | Arabidopsis thaliana | core promoter element around -30 of transcription start |
| HbPAL3 | TATA-box | TATA     | 932 | 4 | + | Arabidopsis thaliana | core promoter element around -30 of transcription start |
| HbPAL3 | TATA-box | TATACA   | 952 | 6 | - | Helianthus annuus    | core promoter element around -30 of transcription start |
| HbPAL3 | TATA-box | TATA     | 954 | 4 | + | Arabidopsis thaliana | core promoter element around -30 of transcription start |
| HbPAL3 | TATA-box | TATAAAA  | 985 | 7 | - | Pisum sativum        | core promoter element around -30 of transcription start |
| HbPAL3 | TATA-box | TATAAA   | 986 | 6 | - | Helianthus annuus    | core promoter element around -30 of transcription start |
| HbPAL3 | TATA-box | TATAA    | 987 | 5 | - | Arabidopsis thaliana | core promoter element around -30 of transcription start |
| HbPAL3 | TATA-box | TATA     | 988 | 4 | + | Arabidopsis thaliana | core promoter element around -30 of transcription start |
| HbPAL3 | TATA-box | ATTATA   | 992 | 6 | + | Brassica napus       | core promoter element around -30 of transcription start |

|        |          |          |      |   |   |                      |                                                         |
|--------|----------|----------|------|---|---|----------------------|---------------------------------------------------------|
| HbPAL3 | TATA-box | TATAA    | 993  | 5 | - | Arabidopsis thaliana | core promoter element around -30 of transcription start |
| HbPAL3 | TATA-box | TATA     | 994  | 4 | + | Arabidopsis thaliana | core promoter element around -30 of transcription start |
| HbPAL3 | TATA-box | ATATAA   | 1010 | 6 | + | Brassica oleracea    | core promoter element around -30 of transcription start |
| HbPAL3 | TATA-box | TATA     | 1011 | 4 | - | Arabidopsis thaliana | core promoter element around -30 of transcription start |
| HbPAL3 | TATA-box | TATAAAT  | 1094 | 7 | - | Brassica juncea      | core promoter element around -30 of transcription start |
| HbPAL3 | TATA-box | TATAAA   | 1095 | 6 | - | Helianthus annuus    | core promoter element around -30 of transcription start |
| HbPAL3 | TATA-box | TATAA    | 1096 | 5 | - | Arabidopsis thaliana | core promoter element around -30 of transcription start |
| HbPAL3 | TATA-box | TATA     | 1097 | 4 | - | Arabidopsis thaliana | core promoter element around -30 of transcription start |
| HbPAL3 | TATA-box | TATAA    | 1134 | 5 | - | Arabidopsis thaliana | core promoter element around -30 of transcription start |
| HbPAL3 | TATA-box | TATA     | 1135 | 4 | - | Arabidopsis thaliana | core promoter element around -30 of transcription start |
| HbPAL3 | TATA-box | TATAA    | 1141 | 5 | - | Arabidopsis thaliana | core promoter element around -30 of transcription start |
| HbPAL3 | TATA-box | TATA     | 1142 | 4 | - | Arabidopsis thaliana | core promoter element around -30 of transcription start |
| HbPAL3 | TATA-box | ATATAT   | 1164 | 6 | - | Brassica napus       | core promoter element around -30 of transcription start |
| HbPAL3 | TATA-box | TATATA   | 1165 | 6 | - | Arabidopsis thaliana | core promoter element around -30 of transcription start |
| HbPAL3 | TATA-box | ATATAT   | 1166 | 6 | - | Brassica napus       | core promoter element around -30 of transcription start |
| HbPAL3 | TATA-box | TATA     | 1167 | 4 | - | Arabidopsis thaliana | core promoter element around -30 of transcription start |
| HbPAL3 | TATA-box | TATAAAT  | 1181 | 7 | - | Brassica juncea      | core promoter element around -30 of transcription start |
| HbPAL3 | TATA-box | TATAAA   | 1182 | 6 | - | Helianthus annuus    | core promoter element around -30 of transcription start |
| HbPAL3 | TATA-box | TATAA    | 1183 | 5 | - | Arabidopsis thaliana | core promoter element around -30 of transcription start |
| HbPAL3 | TATA-box | TATA     | 1184 | 4 | - | Arabidopsis thaliana | core promoter element around -30 of transcription start |
| HbPAL3 | TATA-box | TATTTAAA | 1201 | 8 | + | Arabidopsis thaliana | core promoter element around -30 of transcription start |
| HbPAL3 | TATA-box | TATTTAAA | 1203 | 8 | - | Arabidopsis thaliana | core promoter element around -30 of transcription start |
| HbPAL3 | TATA-box | TATAAGAA | 1330 | 8 | - | Zea mays             | core promoter element around -30 of transcription start |
| HbPAL3 | TATA-box | TATATAA  | 1333 | 7 | - | Arabidopsis thaliana | core promoter element around -30 of transcription start |
| HbPAL3 | TATA-box | TATATA   | 1334 | 6 | - | Arabidopsis thaliana | core promoter element around -30 of transcription start |
| HbPAL3 | TATA-box | ATATAT   | 1335 | 6 | - | Brassica napus       | core promoter element around -30 of transcription start |

|        |             |               |      |    |   |                      |                                                                   |
|--------|-------------|---------------|------|----|---|----------------------|-------------------------------------------------------------------|
| HbPAL3 | TATA-box    | TATA          | 1336 | 4  | - | Arabidopsis thaliana | core promoter element around -30 of transcription start           |
| HbPAL3 | TATA-box    | TATTTAAA      | 1365 | 8  | - | Arabidopsis thaliana | core promoter element around -30 of transcription start           |
| HbPAL3 | TATA-box    | ATTATA        | 1372 | 6  | + | Brassica napus       | core promoter element around -30 of transcription start           |
| HbPAL3 | TATA-box    | TATAA         | 1373 | 5  | - | Arabidopsis thaliana | core promoter element around -30 of transcription start           |
| HbPAL3 | TATA-box    | TATATTTATATTT | 1374 | 12 | + | Avena sativa         | core promoter element around -30 of transcription start           |
| HbPAL3 | TATA-box    | TATTTAAA      | 1382 | 8  | + | Arabidopsis thaliana | core promoter element around -30 of transcription start           |
| HbPAL3 | TATA-box    | ccTATAAAaa    | 1426 | 10 | - | Arabidopsis thaliana | core promoter element around -30 of transcription start           |
| HbPAL3 | TATA-box    | TATAAAA       | 1427 | 7  | - | Pisum sativum        | core promoter element around -30 of transcription start           |
| HbPAL3 | TATA-box    | TATAAA        | 1428 | 6  | - | Helianthus annuus    | core promoter element around -30 of transcription start           |
| HbPAL3 | TATA-box    | TATAA         | 1429 | 5  | - | Arabidopsis thaliana | core promoter element around -30 of transcription start           |
| HbPAL3 | TATA-box    | TATA          | 1430 | 4  | - | Arabidopsis thaliana | core promoter element around -30 of transcription start           |
| HbPAL3 | TATA-box    | TATAAAA       | 1465 | 7  | - | Pisum sativum        | core promoter element around -30 of transcription start           |
| HbPAL3 | TATA-box    | TATAAA        | 1466 | 6  | - | Helianthus annuus    | core promoter element around -30 of transcription start           |
| HbPAL3 | TATA-box    | TATAA         | 1467 | 5  | - | Arabidopsis thaliana | core promoter element around -30 of transcription start           |
| HbPAL3 | TATA-box    | TATA          | 1468 | 4  | - | Arabidopsis thaliana | core promoter element around -30 of transcription start           |
| HbPAL3 | TATA-box    | TACAAAA       | 1472 | 7  | - | Oryza sativa         | core promoter element around -30 of transcription start           |
| HbPAL3 | TATA-box    | TATACA        | 1505 | 6  | - | Helianthus annuus    | core promoter element around -30 of transcription start           |
| HbPAL3 | TATA-box    | TATA          | 1507 | 4  | - | Arabidopsis thaliana | core promoter element around -30 of transcription start           |
| HbPAL3 | TATA-box    | TATTTAAA      | 1829 | 8  | + | Arabidopsis thaliana | core promoter element around -30 of transcription start           |
| HbPAL3 | TCA         | TCATCTTCAT    | 1744 | 9  | - | Pisum sativum        |                                                                   |
| HbPAL3 | TCT-motif   | TCTTAC        | 1699 | 6  | + | Arabidopsis thaliana | part of a light responsive element                                |
| HbPAL3 | TGACG-motif | TGACG         | 671  | 5  | + | Hordeum vulgare      | cis-acting regulatory element involved in the MeJA-responsiveness |
| HbPAL3 | TGACG-motif | TGACG         | 1671 | 5  | + | Hordeum vulgare      | cis-acting regulatory element involved in the MeJA-responsiveness |
| HbPAL3 | WRE3        | CCACCT        | 694  | 6  | + | Pisum sativum        | wound-responsive element                                          |
| HbPAL3 | WRE3        | CCACCT        | 1793 | 6  | + | Pisum sativum        | wound-responsive element                                          |
| HbPAL3 | WUN-motif   | AAATTTCTT     | 368  | 9  | - | Nicotiana glutinosa  | wound-responsive element                                          |

|        |                    |              |      |    |   |                      |                                                                     |
|--------|--------------------|--------------|------|----|---|----------------------|---------------------------------------------------------------------|
| HbPAL3 | WUN-motif          | CCATTTCAA    | 817  | 9  | - | Nicotiana glutinosa  | wound-responsive element                                            |
| HbPAL3 | WUN-motif          | AAATTTCTT    | 1619 | 9  | + | Nicotiana glutinosa  | wound-responsive element                                            |
| HbPAL4 | 3-AF1 binding site | TAAGAGAGGAA  | 991  | 10 | + | Solanum tuberosum    | light responsive element                                            |
| HbPAL4 | AAAC-motif         | CAATCAAAACCT | 781  | 11 | + | Spinacia oleracea    | light responsive element                                            |
| HbPAL4 | ABRE               | CGTACGTGCA   | 1754 | 9  | + | Hordeum vulgare      | cis-acting element involved in the abscisic acid responsiveness     |
| HbPAL4 | ABRE               | ACGTG        | 1757 | 5  | + | Arabidopsis thaliana | cis-acting element involved in the abscisic acid responsiveness     |
| HbPAL4 | ABRE3a             | TACGTG       | 1756 | 6  | + | Zea mays             | cis-acting element involved in the abscisic acid responsiveness     |
| HbPAL4 | ABRE4              | CACGTA       | 1756 | 6  | - | Zea mays             | cis-acting element involved in the abscisic acid responsiveness     |
| HbPAL4 | ARE                | AAACCA       | 395  | 6  | + | Zea mays             | cis-acting regulatory element essential for the anaerobic induction |
| HbPAL4 | ARE                | AAACCA       | 892  | 6  | + | Zea mays             | cis-acting regulatory element essential for the anaerobic induction |
| HbPAL4 | AT~TATA-box        | TATATA       | 1591 | 6  | - | Arabidopsis thaliana |                                                                     |
| HbPAL4 | AT~TATA-box        | TATATA       | 1593 | 6  | - | Arabidopsis thaliana |                                                                     |
| HbPAL4 | AT-rich element    | ATAGAAATCAA  | 533  | 10 | - | Glycine max          | binding site of AT-rich DNA binding protein (ATBP-1)                |
| HbPAL4 | Box 4              | ATTAAT       | 261  | 6  | + | Petroselinum crispum | part of a conserved DNA module involved in light responsiveness     |
| HbPAL4 | Box 4              | ATTAAT       | 527  | 6  | + | Petroselinum crispum | part of a conserved DNA module involved in light responsiveness     |
| HbPAL4 | Box 4              | ATTAAT       | 1267 | 6  | - | Petroselinum crispum | part of a conserved DNA module involved in light responsiveness     |
| HbPAL4 | CAAT-box           | CAAT         | 50   | 4  | + | Nicotiana glutinosa  |                                                                     |
| HbPAL4 | CAAT-box           | CAAT         | 123  | 4  | + | Nicotiana glutinosa  |                                                                     |
| HbPAL4 | CAAT-box           | CAAAT        | 125  | 5  | - | Pisum sativum        | common cis-acting element in promoter and enhancer regions          |
| HbPAL4 | CAAT-box           | CAAT         | 132  | 4  | + | Nicotiana glutinosa  |                                                                     |
| HbPAL4 | CAAT-box           | CAAT         | 192  | 4  | + | Nicotiana glutinosa  |                                                                     |
| HbPAL4 | CAAT-box           | CAAT         | 272  | 4  | - | Nicotiana glutinosa  |                                                                     |
| HbPAL4 | CAAT-box           | CAAT         | 277  | 4  | + | Nicotiana glutinosa  |                                                                     |
| HbPAL4 | CAAT-box           | CAAT         | 321  | 4  | - | Nicotiana glutinosa  |                                                                     |
| HbPAL4 | CAAT-box           | CAAAT        | 334  | 5  | + | Pisum sativum        | common cis-acting element in promoter and enhancer regions          |

|        |          |       |      |   |   |                      |                                                            |
|--------|----------|-------|------|---|---|----------------------|------------------------------------------------------------|
| HbPAL4 | CAAT-box | CAAT  | 590  | 4 | + | Nicotiana glutinosa  |                                                            |
| HbPAL4 | CAAT-box | CAAAT | 633  | 5 | - | Pisum sativum        | common cis-acting element in promoter and enhancer regions |
| HbPAL4 | CAAT-box | CAAT  | 723  | 4 | + | Nicotiana glutinosa  |                                                            |
| HbPAL4 | CAAT-box | CAAT  | 760  | 4 | - | Nicotiana glutinosa  |                                                            |
| HbPAL4 | CAAT-box | CAAT  | 814  | 4 | + | Nicotiana glutinosa  |                                                            |
| HbPAL4 | CAAT-box | CAAT  | 831  | 4 | - | Nicotiana glutinosa  |                                                            |
| HbPAL4 | CAAT-box | CCAAT | 877  | 5 | + | Arabidopsis thaliana | common cis-acting element in promoter and enhancer regions |
| HbPAL4 | CAAT-box | CAAT  | 878  | 4 | + | Nicotiana glutinosa  |                                                            |
| HbPAL4 | CAAT-box | CAAT  | 909  | 4 | + | Nicotiana glutinosa  |                                                            |
| HbPAL4 | CAAT-box | CAAAT | 1002 | 5 | + | Pisum sativum        | common cis-acting element in promoter and enhancer regions |
| HbPAL4 | CAAT-box | CAAAT | 1077 | 5 | + | Pisum sativum        | common cis-acting element in promoter and enhancer regions |
| HbPAL4 | CAAT-box | CCAAT | 1325 | 5 | + | Arabidopsis thaliana | common cis-acting element in promoter and enhancer regions |
| HbPAL4 | CAAT-box | CAAT  | 1326 | 4 | + | Nicotiana glutinosa  |                                                            |
| HbPAL4 | CAAT-box | CAAAT | 1353 | 5 | - | Pisum sativum        | common cis-acting element in promoter and enhancer regions |
| HbPAL4 | CAAT-box | CAAAT | 1427 | 5 | + | Pisum sativum        | common cis-acting element in promoter and enhancer regions |
| HbPAL4 | CAAT-box | CAAAT | 1465 | 5 | + | Pisum sativum        | common cis-acting element in promoter and enhancer regions |
| HbPAL4 | CAAT-box | CAAT  | 1472 | 4 | + | Nicotiana glutinosa  |                                                            |
| HbPAL4 | CAAT-box | CCAAT | 1524 | 5 | + | Arabidopsis thaliana | common cis-acting element in promoter and enhancer regions |
| HbPAL4 | CAAT-box | CAAT  | 1525 | 4 | + | Nicotiana glutinosa  |                                                            |
| HbPAL4 | CAAT-box | CAAT  | 1550 | 4 | + | Nicotiana glutinosa  |                                                            |
| HbPAL4 | CAAT-box | CAAT  | 1650 | 4 | + | Nicotiana glutinosa  |                                                            |
| HbPAL4 | CAAT-box | CCAAT | 1652 | 5 | - | Arabidopsis thaliana | common cis-acting element in promoter and enhancer regions |
| HbPAL4 | CAAT-box | CCAAT | 1703 | 5 | - | Arabidopsis thaliana | common cis-acting element in promoter and enhancer regions |
| HbPAL4 | CAAT-box | CAAT  | 1730 | 4 | + | Nicotiana glutinosa  |                                                            |
| HbPAL4 | CAAT-box | CAAT  | 1762 | 4 | + | Nicotiana glutinosa  |                                                            |
| HbPAL4 | CAAT-box | CAAT  | 1780 | 4 | - | Nicotiana glutinosa  |                                                            |

|        |                      |            |      |   |   |                            |                                                                |
|--------|----------------------|------------|------|---|---|----------------------------|----------------------------------------------------------------|
| HbPAL4 | CAAT-box             | CAAT       | 1804 | 4 | + | Nicotiana glutinosa        |                                                                |
| HbPAL4 | CAAT-box             | CAAAT      | 1814 | 5 | + | Pisum sativum              | common cis-acting element in promoter and enhancer regions     |
| HbPAL4 | CAAT-box             | CAAT       | 1857 | 4 | - | Nicotiana glutinosa        |                                                                |
| HbPAL4 | CAT-box              | GCCACT     | 1248 | 6 | + | Arabidopsis thaliana       | cis-acting regulatory element related to meristem expression   |
| HbPAL4 | chs-CMA2a            | TCACCTGA   | 1908 | 8 | + | Petroselinum crispum       | part of a light responsive element                             |
| HbPAL4 | circadian            | CAAAGATATC | 164  | 9 | - | Lycopersicon<br>esculentum | cis-acting regulatory element involved in circadian control    |
| HbPAL4 | ERE                  | ATTCATA    | 1345 | 8 | + | Nicotiana glutinos         | ethylene-responsive element                                    |
| HbPAL4 | GATA-motif           | GATAGGA    | 1436 | 7 | - | Arabidopsis thaliana       | part of a light responsive element                             |
| HbPAL4 | GATA-motif           | AAGGATAAGG | 1708 | 9 | + | Solanum tuberosum          | part of a light responsive element                             |
| HbPAL4 | G-box                | TACGTG     | 1756 | 6 | + | Arabidopsis thaliana       | cis-acting regulatory element involved in light responsiveness |
| HbPAL4 | GT1-motif            | GTGTGTGAA  | 1494 | 9 | + | Solanum tuberosum          | light responsive element                                       |
| HbPAL4 | MBS                  | CAACTG     | 899  | 6 | + | Arabidopsis thaliana       | MYB binding site involved in drought-inducibility              |
| HbPAL4 | MBS                  | CAACTG     | 1053 | 6 | + | Arabidopsis thaliana       | MYB binding site involved in drought-inducibility              |
| HbPAL4 | MRE                  | AACCTAA    | 357  | 7 | + | Petroselinum crispum       | MYB binding site involved in light responsiveness              |
| HbPAL4 | MRE                  | AACCTAA    | 735  | 7 | + | Petroselinum crispum       | MYB binding site involved in light responsiveness              |
| HbPAL4 | MRE                  | AACCTAA    | 1381 | 7 | + | Petroselinum crispum       | MYB binding site involved in light responsiveness              |
| HbPAL4 | MYB                  | TAACCA     | 874  | 6 | + | Arabidopsis thaliana       | MYB binding site                                               |
| HbPAL4 | MYB                  | CAACCA     | 1900 | 6 | + | Arabidopsis thaliana       | MYB binding site                                               |
| HbPAL4 | Myb                  | CAACTG     | 899  | 6 | + | Arabidopsis thaliana       | MYB binding site                                               |
| HbPAL4 | Myb                  | CAACTG     | 1053 | 6 | + | Arabidopsis thaliana       | MYB binding site                                               |
| HbPAL4 | MYB-like<br>sequence | TAACCA     | 874  | 6 | + | Arabidopsis thaliana       | MYB binding site                                               |
| HbPAL4 | MYC                  | CATGTG     | 1288 | 6 | + | Arabidopsis thaliana       | MYC binding site                                               |
| HbPAL4 | MYC                  | CATTG      | 1465 | 6 | - | Arabidopsis thaliana       | MYC binding site                                               |
| HbPAL4 | MYC                  | CAATTG     | 1650 | 6 | - | Arabidopsis thaliana       | MYC binding site                                               |

|        |          |          |      |   |   |                      |                                                         |
|--------|----------|----------|------|---|---|----------------------|---------------------------------------------------------|
| HbPAL4 | STRE     | AGGGG    | 39   | 5 | - | Arabidopsis thaliana |                                                         |
| HbPAL4 | STRE     | AGGGG    | 950  | 5 | + | Arabidopsis thaliana |                                                         |
| HbPAL4 | STRE     | AGGGG    | 1365 | 5 | + | Arabidopsis thaliana |                                                         |
| HbPAL4 | TATA     | TATAAAAT | 347  | 8 | + | Arabidopsis thaliana |                                                         |
| HbPAL4 | TATA     | TATAAAAT | 1110 | 8 | - | Arabidopsis thaliana |                                                         |
| HbPAL4 | TATA-box | TACAAAA  | 237  | 7 | + | Oryza sativa         | core promoter element around -30 of transcription start |
| HbPAL4 | TATA-box | ATTATA   | 254  | 6 | + | Brassica napus       | core promoter element around -30 of transcription start |
| HbPAL4 | TATA-box | TATAA    | 255  | 5 | - | Arabidopsis thaliana | core promoter element around -30 of transcription start |
| HbPAL4 | TATA-box | TATA     | 256  | 4 | + | Arabidopsis thaliana | core promoter element around -30 of transcription start |
| HbPAL4 | TATA-box | TATA     | 268  | 4 | + | Arabidopsis thaliana | core promoter element around -30 of transcription start |
| HbPAL4 | TATA-box | ATTATA   | 279  | 6 | + | Brassica napus       | core promoter element around -30 of transcription start |
| HbPAL4 | TATA-box | TATAA    | 280  | 5 | - | Arabidopsis thaliana | core promoter element around -30 of transcription start |
| HbPAL4 | TATA-box | TATA     | 281  | 4 | + | Arabidopsis thaliana | core promoter element around -30 of transcription start |
| HbPAL4 | TATA-box | TATA     | 347  | 4 | + | Arabidopsis thaliana | core promoter element around -30 of transcription start |
| HbPAL4 | TATA-box | TATA     | 391  | 4 | + | Arabidopsis thaliana | core promoter element around -30 of transcription start |
| HbPAL4 | TATA-box | TATAA    | 485  | 5 | - | Arabidopsis thaliana | core promoter element around -30 of transcription start |
| HbPAL4 | TATA-box | TATA     | 486  | 4 | + | Arabidopsis thaliana | core promoter element around -30 of transcription start |
| HbPAL4 | TATA-box | TATA     | 629  | 4 | + | Arabidopsis thaliana | core promoter element around -30 of transcription start |
| HbPAL4 | TATA-box | TATA     | 676  | 4 | + | Arabidopsis thaliana | core promoter element around -30 of transcription start |
| HbPAL4 | TATA-box | ATATAT   | 717  | 6 | + | Brassica napus       | core promoter element around -30 of transcription start |
| HbPAL4 | TATA-box | TATA     | 718  | 4 | + | Arabidopsis thaliana | core promoter element around -30 of transcription start |
| HbPAL4 | TATA-box | TATA     | 792  | 4 | + | Arabidopsis thaliana | core promoter element around -30 of transcription start |
| HbPAL4 | TATA-box | TATAA    | 920  | 5 | - | Arabidopsis thaliana | core promoter element around -30 of transcription start |
| HbPAL4 | TATA-box | TATA     | 921  | 4 | + | Arabidopsis thaliana | core promoter element around -30 of transcription start |
| HbPAL4 | TATA-box | TATA     | 959  | 4 | + | Arabidopsis thaliana | core promoter element around -30 of transcription start |
| HbPAL4 | TATA-box | TATA     | 1038 | 4 | - | Arabidopsis thaliana | core promoter element around -30 of transcription start |



|        |          |              |      |    |   |                      |                                                         |
|--------|----------|--------------|------|----|---|----------------------|---------------------------------------------------------|
| HbPAL4 | TATA-box | TATAAAA      | 1111 | 7  | - | Pisum sativum        | core promoter element around -30 of transcription start |
| HbPAL4 | TATA-box | TATAAA       | 1112 | 6  | - | Helianthus annuus    | core promoter element around -30 of transcription start |
| HbPAL4 | TATA-box | TATAA        | 1113 | 5  | - | Arabidopsis thaliana | core promoter element around -30 of transcription start |
| HbPAL4 | TATA-box | TATA         | 1114 | 4  | - | Arabidopsis thaliana | core promoter element around -30 of transcription start |
| HbPAL4 | TATA-box | TATAAA       | 1259 | 6  | - | Helianthus annuus    | core promoter element around -30 of transcription start |
| HbPAL4 | TATA-box | TATAA        | 1260 | 5  | - | Arabidopsis thaliana | core promoter element around -30 of transcription start |
| HbPAL4 | TATA-box | TATA         | 1261 | 4  | - | Arabidopsis thaliana | core promoter element around -30 of transcription start |
| HbPAL4 | TATA-box | ATATAA       | 1305 | 6  | + | Brassica oleracea    | core promoter element around -30 of transcription start |
| HbPAL4 | TATA-box | TATA         | 1306 | 4  | - | Arabidopsis thaliana | core promoter element around -30 of transcription start |
| HbPAL4 | TATA-box | ATTATA       | 1328 | 6  | + | Brassica napus       | core promoter element around -30 of transcription start |
| HbPAL4 | TATA-box | TATAA        | 1329 | 5  | - | Arabidopsis thaliana | core promoter element around -30 of transcription start |
| HbPAL4 | TATA-box | TATA         | 1330 | 4  | - | Arabidopsis thaliana | core promoter element around -30 of transcription start |
| HbPAL4 | TATA-box | TATA         | 1485 | 4  | - | Arabidopsis thaliana | core promoter element around -30 of transcription start |
| HbPAL4 | TATA-box | ATTATA       | 1527 | 6  | + | Brassica napus       | core promoter element around -30 of transcription start |
| HbPAL4 | TATA-box | TATAA        | 1528 | 5  | - | Arabidopsis thaliana | core promoter element around -30 of transcription start |
| HbPAL4 | TATA-box | TATA         | 1529 | 4  | - | Arabidopsis thaliana | core promoter element around -30 of transcription start |
| HbPAL4 | TATA-box | taTATAAAtc   | 1589 | 9  | - | Arabidopsis thaliana | core promoter element around -30 of transcription start |
| HbPAL4 | TATA-box | ATATAT       | 1590 | 6  | - | Brassica napus       | core promoter element around -30 of transcription start |
| HbPAL4 | TATA-box | TATATA       | 1591 | 6  | - | Arabidopsis thaliana | core promoter element around -30 of transcription start |
| HbPAL4 | TATA-box | ATATAT       | 1592 | 6  | - | Brassica napus       | core promoter element around -30 of transcription start |
| HbPAL4 | TATA-box | TATATA       | 1593 | 6  | - | Arabidopsis thaliana | core promoter element around -30 of transcription start |
| HbPAL4 | TATA-box | ATATAA       | 1594 | 6  | + | Brassica oleracea    | core promoter element around -30 of transcription start |
| HbPAL4 | TATA-box | TATA         | 1595 | 4  | - | Arabidopsis thaliana | core promoter element around -30 of transcription start |
| HbPAL4 | TATA-box | TATA         | 1745 | 4  | - | Arabidopsis thaliana | core promoter element around -30 of transcription start |
| HbPAL4 | TATA-box | tcTATAAATAgg | 1841 | 11 | - | Nicotiana tabacum    | core promoter element around -30 of transcription start |
| HbPAL4 | TATA-box | TATTTAAA     | 1843 | 8  | + | Arabidopsis thaliana | core promoter element around -30 of transcription start |

|        |             |                                 |      |     |   |                      |                                                                 |
|--------|-------------|---------------------------------|------|-----|---|----------------------|-----------------------------------------------------------------|
| HbPAL4 | TCA         | TCATCTTCAT                      | 1785 | 9   | - | Pisum sativum        |                                                                 |
| HbPAL4 | TCCC-motif  | TCTCCCT                         | 692  | 7   | + | Spinacia oleracea    | part of a light responsive element                              |
| HbPAL4 | W box       | TTGACC                          | 129  | 6   | - | Arabidopsis thaliana | WRKY binding site                                               |
| HbPAL4 | WUN-motif   | TAATTACTC                       | 961  | 9   | + | Nicotiana glutinosa  | wound-responsive element                                        |
| HbPAL5 | 4cI-CMA2b   | TCTCACCAACCCCA                  | 1278 | 13  | - | Petroselinum crispum | light responsive element                                        |
| HbPAL5 | AAGAA-motif | GAAAGAA                         | 1362 | 7   | - | Avena sativa         |                                                                 |
| HbPAL5 | AAGAA-motif | GAAAGAA                         | 1366 | 7   | - | Avena sativa         |                                                                 |
| HbPAL5 | ABRE        | ACGTG                           | 1320 | 5   | + | Arabidopsis thaliana | cis-acting element involved in the abscisic acid responsiveness |
| HbPAL5 | ABRE        | ACGTG                           | 1687 | 5   | + | Arabidopsis thaliana | cis-acting element involved in the abscisic acid responsiveness |
| HbPAL5 | ABRE        | GACACGTGGC                      | 1750 | 9   | - | Triticum aestivum    | cis-acting element involved in the abscisic acid responsiveness |
| HbPAL5 | ABRE        | CACGTG                          | 1752 | 6   | - | Arabidopsis thaliana | cis-acting element involved in the abscisic acid responsiveness |
| HbPAL5 | ABRE        | ACGTG                           | 1753 | 5   | + | Arabidopsis thaliana | cis-acting element involved in the abscisic acid responsiveness |
| HbPAL5 | ABRE3a      | TACGTG                          | 1686 | 6   | + | Zea mays             | cis-acting element involved in the abscisic acid responsiveness |
| HbPAL5 | ABRE4       | CACGTA                          | 1686 | 6   | - | Zea mays             | cis-acting element involved in the abscisic acid responsiveness |
| HbPAL5 | AC-I        | (T/C)C(T/C)(C/T)ACC<br>(T/C)ACC | 1281 | 8.5 | - | Phaseolus vulgaris   |                                                                 |
| HbPAL5 | AC-I        | (T/C)C(T/C)(C/T)ACC<br>(T/C)ACC | 1340 | 9   | + | Phaseolus vulgaris   |                                                                 |
| HbPAL5 | as-1        | TGACG                           | 1318 | 5   | + | Arabidopsis thaliana |                                                                 |
| HbPAL5 | as-1        | TGACG                           | 1783 | 5   | + | Arabidopsis thaliana |                                                                 |
| HbPAL5 | AT~TATA-box | TATATA                          | 158  | 6   | + | Arabidopsis thaliana |                                                                 |
| HbPAL5 | AT~TATA-box | TATATA                          | 160  | 6   | + | Arabidopsis thaliana |                                                                 |
| HbPAL5 | AT~TATA-box | TATATA                          | 162  | 6   | + | Arabidopsis thaliana |                                                                 |
| HbPAL5 | AT~TATA-box | TATATA                          | 174  | 6   | + | Arabidopsis thaliana |                                                                 |
| HbPAL5 | AT~TATA-box | TATATA                          | 902  | 6   | + | Arabidopsis thaliana |                                                                 |
| HbPAL5 | AT~TATA-box | TATATA                          | 904  | 6   | + | Arabidopsis thaliana |                                                                 |

|        |             |              |      |    |   |                      |                                                                 |
|--------|-------------|--------------|------|----|---|----------------------|-----------------------------------------------------------------|
| HbPAL5 | AT~TATA-box | TATATA       | 1230 | 6  | - | Arabidopsis thaliana |                                                                 |
| HbPAL5 | AT~TATA-box | TATATA       | 1482 | 6  | - | Arabidopsis thaliana |                                                                 |
| HbPAL5 | AT~TATA-box | TATATA       | 1484 | 6  | - | Arabidopsis thaliana |                                                                 |
| HbPAL5 | AT~TATA-box | TATATA       | 1486 | 6  | - | Arabidopsis thaliana |                                                                 |
| HbPAL5 | AT~TATA-box | TATATA       | 1488 | 6  | - | Arabidopsis thaliana |                                                                 |
| HbPAL5 | AT~TATA-box | TATATA       | 1490 | 6  | - | Arabidopsis thaliana |                                                                 |
| HbPAL5 | AT~TATA-box | TATATA       | 1492 | 6  | - | Arabidopsis thaliana |                                                                 |
| HbPAL5 | AT~TATA-box | TATATA       | 1494 | 6  | - | Arabidopsis thaliana |                                                                 |
| HbPAL5 | AT~TATA-box | TATATA       | 1496 | 6  | - | Arabidopsis thaliana |                                                                 |
| HbPAL5 | AT~TATA-box | TATATAAA     | 1591 | 8  | - | Arabidopsis thaliana |                                                                 |
| HbPAL5 | AT~TATA-box | TATATA       | 1593 | 6  | - | Arabidopsis thaliana |                                                                 |
| HbPAL5 | AT1-motif   | AATTATTTTATT | 1001 | 13 | - | Solanum tuberosum    | part of a light responsive module                               |
| HbPAL5 | Box 4       | ATTAAT       | 7    | 6  | + | Petroselinum crispum | part of a conserved DNA module involved in light responsiveness |
| HbPAL5 | Box 4       | ATTAAT       | 58   | 6  | + | Petroselinum crispum | part of a conserved DNA module involved in light responsiveness |
| HbPAL5 | Box 4       | ATTAAT       | 224  | 6  | + | Petroselinum crispum | part of a conserved DNA module involved in light responsiveness |
| HbPAL5 | Box 4       | ATTAAT       | 248  | 6  | + | Petroselinum crispum | part of a conserved DNA module involved in light responsiveness |
| HbPAL5 | Box 4       | ATTAAT       | 354  | 6  | + | Petroselinum crispum | part of a conserved DNA module involved in light responsiveness |
| HbPAL5 | Box 4       | ATTAAT       | 1025 | 6  | - | Petroselinum crispum | part of a conserved DNA module involved in light responsiveness |
| HbPAL5 | Box 4       | ATTAAT       | 1059 | 6  | - | Petroselinum crispum | part of a conserved DNA module involved in light responsiveness |
| HbPAL5 | Box 4       | ATTAAT       | 1181 | 6  | - | Petroselinum crispum | part of a conserved DNA module involved in light responsiveness |
| HbPAL5 | Box 4       | ATTAAT       | 1189 | 6  | - | Petroselinum crispum | part of a conserved DNA module involved in light responsiveness |
| HbPAL5 | Box 4       | ATTAAT       | 1237 | 6  | - | Petroselinum crispum | part of a conserved DNA module involved in light responsiveness |
| HbPAL5 | Box II      | TGGTAATAA    | 665  | 9  | - | Solanum tuberosum    | part of a light responsive element                              |
| HbPAL5 | CAAT-box    | CAAT         | 53   | 4  | - | Nicotiana glutinosa  |                                                                 |
| HbPAL5 | CAAT-box    | CAAT         | 91   | 4  | - | Nicotiana glutinosa  |                                                                 |
| HbPAL5 | CAAT-box    | CAAAT        | 207  | 5  | + | Pisum sativum        | common cis-acting element in promoter and enhancer regions      |

|        |          |       |      |   |   |                      |                                                            |
|--------|----------|-------|------|---|---|----------------------|------------------------------------------------------------|
| HbPAL5 | CAAT-box | CAAT  | 244  | 4 | - | Nicotiana glutinosa  |                                                            |
| HbPAL5 | CAAT-box | CAAT  | 293  | 4 | + | Nicotiana glutinosa  |                                                            |
| HbPAL5 | CAAT-box | CAAAT | 295  | 5 | - | Pisum sativum        | common cis-acting element in promoter and enhancer regions |
| HbPAL5 | CAAT-box | CAAAT | 300  | 5 | - | Pisum sativum        | common cis-acting element in promoter and enhancer regions |
| HbPAL5 | CAAT-box | CAAT  | 305  | 4 | + | Nicotiana glutinosa  |                                                            |
| HbPAL5 | CAAT-box | CCAAT | 335  | 5 | + | Arabidopsis thaliana | common cis-acting element in promoter and enhancer regions |
| HbPAL5 | CAAT-box | CAAT  | 336  | 4 | + | Nicotiana glutinosa  |                                                            |
| HbPAL5 | CAAT-box | CAAT  | 384  | 4 | - | Nicotiana glutinosa  |                                                            |
| HbPAL5 | CAAT-box | CAAT  | 428  | 4 | - | Nicotiana glutinosa  |                                                            |
| HbPAL5 | CAAT-box | CAAT  | 440  | 4 | + | Nicotiana glutinosa  |                                                            |
| HbPAL5 | CAAT-box | CAAT  | 591  | 4 | + | Nicotiana glutinosa  |                                                            |
| HbPAL5 | CAAT-box | CAAAT | 617  | 5 | - | Pisum sativum        | common cis-acting element in promoter and enhancer regions |
| HbPAL5 | CAAT-box | CAAT  | 646  | 4 | + | Nicotiana glutinosa  |                                                            |
| HbPAL5 | CAAT-box | CAAT  | 689  | 4 | - | Nicotiana glutinosa  |                                                            |
| HbPAL5 | CAAT-box | CAAT  | 728  | 4 | + | Nicotiana glutinosa  |                                                            |
| HbPAL5 | CAAT-box | CAAT  | 784  | 4 | + | Nicotiana glutinosa  |                                                            |
| HbPAL5 | CAAT-box | CAAAT | 791  | 5 | - | Pisum sativum        | common cis-acting element in promoter and enhancer regions |
| HbPAL5 | CAAT-box | CAAAT | 804  | 5 | + | Pisum sativum        | common cis-acting element in promoter and enhancer regions |
| HbPAL5 | CAAT-box | CAAAT | 850  | 5 | + | Pisum sativum        | common cis-acting element in promoter and enhancer regions |
| HbPAL5 | CAAT-box | CAAT  | 861  | 4 | - | Nicotiana glutinosa  |                                                            |
| HbPAL5 | CAAT-box | CAAAT | 875  | 5 | - | Pisum sativum        | common cis-acting element in promoter and enhancer regions |
| HbPAL5 | CAAT-box | CAAAT | 881  | 5 | - | Pisum sativum        | common cis-acting element in promoter and enhancer regions |
| HbPAL5 | CAAT-box | CAAAT | 1029 | 5 | - | Pisum sativum        | common cis-acting element in promoter and enhancer regions |
| HbPAL5 | CAAT-box | CAAT  | 1048 | 4 | + | Nicotiana glutinosa  |                                                            |
| HbPAL5 | CAAT-box | CAAT  | 1063 | 4 | - | Nicotiana glutinosa  |                                                            |
| HbPAL5 | CAAT-box | CAAAT | 1083 | 5 | - | Pisum sativum        | common cis-acting element in promoter and enhancer regions |

|        |             |           |      |   |   |                      |                                                                   |
|--------|-------------|-----------|------|---|---|----------------------|-------------------------------------------------------------------|
| HbPAL5 | CAAT-box    | CAAAT     | 1089 | 5 | + | Pisum sativum        | common cis-acting element in promoter and enhancer regions        |
| HbPAL5 | CAAT-box    | CAAT      | 1098 | 4 | + | Nicotiana glutinosa  |                                                                   |
| HbPAL5 | CAAT-box    | CAAT      | 1162 | 4 | + | Nicotiana glutinosa  |                                                                   |
| HbPAL5 | CAAT-box    | CAAAT     | 1533 | 5 | + | Pisum sativum        | common cis-acting element in promoter and enhancer regions        |
| HbPAL5 | CAAT-box    | CCAAT     | 1556 | 5 | + | Arabidopsis thaliana | common cis-acting element in promoter and enhancer regions        |
| HbPAL5 | CAAT-box    | CAAT      | 1557 | 4 | + | Nicotiana glutinosa  |                                                                   |
| HbPAL5 | CAAT-box    | CAAT      | 1624 | 4 | + | Nicotiana glutinosa  |                                                                   |
| HbPAL5 | CAAT-box    | CAAT      | 1658 | 4 | + | Nicotiana glutinosa  |                                                                   |
| HbPAL5 | CAAT-box    | CAAAT     | 1668 | 5 | - | Pisum sativum        | common cis-acting element in promoter and enhancer regions        |
| HbPAL5 | CAAT-box    | CAAT      | 1682 | 4 | + | Nicotiana glutinosa  |                                                                   |
| HbPAL5 | CAAT-box    | CAAT      | 1741 | 4 | + | Nicotiana glutinosa  |                                                                   |
| HbPAL5 | CAAT-box    | CCAAT     | 1830 | 5 | + | Arabidopsis thaliana | common cis-acting element in promoter and enhancer regions        |
| HbPAL5 | CAAT-box    | CAAT      | 1831 | 4 | + | Nicotiana glutinosa  |                                                                   |
| HbPAL5 | CAT-box     | GCCACT    | 1885 | 6 | + | Arabidopsis thaliana | cis-acting regulatory element related to meristem expression      |
| HbPAL5 | CCAAT-box   | CAACGG    | 1791 | 6 | + | Hordeum vulgare      | MYBHv1 binding site                                               |
| HbPAL5 | CGTCA-motif | CGTCA     | 1318 | 5 | - | Hordeum vulgare      | cis-acting regulatory element involved in the MeJA-responsiveness |
| HbPAL5 | CGTCA-motif | CGTCA     | 1783 | 5 | - | Hordeum vulgare      | cis-acting regulatory element involved in the MeJA-responsiveness |
| HbPAL5 | chs-CMA1a   | TTACTTAA  | 416  | 8 | - | Daucus carota        | part of a light responsive element                                |
| HbPAL5 | ERE         | ATTTTAAA  | 681  | 8 | + | Nicotiana glutinos   | ethylene-responsive element                                       |
| HbPAL5 | ERE         | ATTTTAAA  | 683  | 8 | - | Nicotiana glutinos   | ethylene-responsive element                                       |
| HbPAL5 | ERE         | AT TTCATA | 890  | 8 | - | Nicotiana glutinos   | ethylene-responsive element                                       |
| HbPAL5 | ERE         | AT TTCATA | 1432 | 8 | + | Nicotiana glutinos   | ethylene-responsive element                                       |
| HbPAL5 | GA-motif    | ATAGATAA  | 165  | 8 | + | Arabidopsis thaliana | part of a light responsive element                                |
| HbPAL5 | G-box       | CACGTC    | 1319 | 6 | - | Zea mays             | cis-acting regulatory element involved in light responsiveness    |
| HbPAL5 | G-box       | TACGTG    | 1686 | 6 | + | Arabidopsis thaliana | cis-acting regulatory element involved in light responsiveness    |
| HbPAL5 | G-box       | CACGTG    | 1752 | 6 | - | Arabidopsis thaliana | cis-acting regulatory element involved in light responsiveness    |

|        |                         |                            |      |   |   |                      |                                                                         |
|--------|-------------------------|----------------------------|------|---|---|----------------------|-------------------------------------------------------------------------|
| HbPAL5 | G-Box                   | CACGTG                     | 1752 | 6 | - | Pisum sativum        | cis-acting regulatory element involved in light responsiveness          |
| HbPAL5 | GCN4_motif              | TGAGTCA                    | 742  | 7 | + | Oryza sativa         | cis-regulatory element involved in endosperm expression                 |
| HbPAL5 | GT1-motif               | GGTTAA                     | 534  | 6 | + | Arabidopsis thaliana | light responsive element                                                |
| HbPAL5 | I-box                   | gGATAAGGTG                 | 548  | 9 | + | Zea mays             | part of a light responsive element                                      |
| HbPAL5 | MYB                     | CAACCA                     | 1280 | 6 | - | Arabidopsis thaliana | MYB binding site                                                        |
| HbPAL5 | MYB                     | CAACCA                     | 1811 | 6 | + | Arabidopsis thaliana | MYB binding site                                                        |
| HbPAL5 | MYB                     | CAACCA                     | 1868 | 6 | + | Arabidopsis thaliana | MYB binding site                                                        |
| HbPAL5 | MYB                     | CAACCA                     | 1877 | 6 | - | Arabidopsis thaliana | MYB binding site                                                        |
| HbPAL5 | MYB<br>recognition site | CCGTTG                     | 1791 | 6 | - | Arabidopsis thaliana | MYB binding site                                                        |
| HbPAL5 | MYC                     | CATTTG                     | 790  | 6 | + | Arabidopsis thaliana | MYC binding site                                                        |
| HbPAL5 | MYC                     | CATTTG                     | 804  | 6 | - | Arabidopsis thaliana | MYC binding site                                                        |
| HbPAL5 | O2-site                 | GATGA(C/T)(A/G)TG<br>(A/G) | 1316 | 8 | + | Zea mays             | cis-acting regulatory element involved in zein metabolism<br>regulation |
| HbPAL5 | STRE                    | AGGGG                      | 824  | 5 | - | Arabidopsis thaliana |                                                                         |
| HbPAL5 | STRE                    | AGGGG                      | 1349 | 5 | - | Arabidopsis thaliana |                                                                         |
| HbPAL5 | STRE                    | AGGGG                      | 1837 | 5 | - | Arabidopsis thaliana |                                                                         |
| HbPAL5 | STRE                    | AGGGG                      | 1905 | 5 | - | Arabidopsis thaliana |                                                                         |
| HbPAL5 | TATA                    | TATAAAAT                   | 1211 | 8 | + | Arabidopsis thaliana |                                                                         |
| HbPAL5 | TATA                    | TATAAAAT                   | 1589 | 8 | - | Arabidopsis thaliana |                                                                         |
| HbPAL5 | TATA                    | TATAAAAT                   | 1603 | 8 | - | Arabidopsis thaliana |                                                                         |
| HbPAL5 | TATA-box                | TATA                       | 122  | 4 | + | Arabidopsis thaliana | core promoter element around -30 of transcription start                 |
| HbPAL5 | TATA-box                | taTATAAAAtc                | 156  | 9 | - | Arabidopsis thaliana | core promoter element around -30 of transcription start                 |
| HbPAL5 | TATA-box                | ATATAT                     | 157  | 6 | + | Brassica napus       | core promoter element around -30 of transcription start                 |
| HbPAL5 | TATA-box                | TATATA                     | 158  | 6 | + | Arabidopsis thaliana | core promoter element around -30 of transcription start                 |
| HbPAL5 | TATA-box                | ATATAT                     | 159  | 6 | + | Brassica napus       | core promoter element around -30 of transcription start                 |

|        |          |        |     |   |   |                      |                                                         |
|--------|----------|--------|-----|---|---|----------------------|---------------------------------------------------------|
| HbPAL5 | TATA-box | TATATA | 160 | 6 | + | Arabidopsis thaliana | core promoter element around -30 of transcription start |
| HbPAL5 | TATA-box | ATATAT | 161 | 6 | + | Brassica napus       | core promoter element around -30 of transcription start |
| HbPAL5 | TATA-box | TATATA | 162 | 6 | + | Arabidopsis thaliana | core promoter element around -30 of transcription start |
| HbPAL5 | TATA-box | TATA   | 164 | 4 | + | Arabidopsis thaliana | core promoter element around -30 of transcription start |
| HbPAL5 | TATA-box | ATATAT | 173 | 6 | + | Brassica napus       | core promoter element around -30 of transcription start |
| HbPAL5 | TATA-box | TATATA | 174 | 6 | + | Arabidopsis thaliana | core promoter element around -30 of transcription start |
| HbPAL5 | TATA-box | ATATAT | 175 | 6 | + | Brassica napus       | core promoter element around -30 of transcription start |
| HbPAL5 | TATA-box | TATA   | 176 | 4 | + | Arabidopsis thaliana | core promoter element around -30 of transcription start |
| HbPAL5 | TATA-box | ATATAA | 219 | 6 | + | Brassica oleracea    | core promoter element around -30 of transcription start |
| HbPAL5 | TATA-box | TATA   | 220 | 4 | + | Arabidopsis thaliana | core promoter element around -30 of transcription start |
| HbPAL5 | TATA-box | TATAAA | 322 | 6 | - | Helianthus annuus    | core promoter element around -30 of transcription start |
| HbPAL5 | TATA-box | TATAA  | 323 | 5 | - | Arabidopsis thaliana | core promoter element around -30 of transcription start |
| HbPAL5 | TATA-box | TATA   | 324 | 4 | + | Arabidopsis thaliana | core promoter element around -30 of transcription start |
| HbPAL5 | TATA-box | ATTATA | 358 | 6 | + | Brassica napus       | core promoter element around -30 of transcription start |
| HbPAL5 | TATA-box | TATAA  | 359 | 5 | - | Arabidopsis thaliana | core promoter element around -30 of transcription start |
| HbPAL5 | TATA-box | TATA   | 360 | 4 | + | Arabidopsis thaliana | core promoter element around -30 of transcription start |
| HbPAL5 | TATA-box | ATATAA | 399 | 6 | + | Brassica oleracea    | core promoter element around -30 of transcription start |
| HbPAL5 | TATA-box | TATA   | 400 | 4 | + | Arabidopsis thaliana | core promoter element around -30 of transcription start |
| HbPAL5 | TATA-box | ATATAA | 442 | 6 | + | Brassica oleracea    | core promoter element around -30 of transcription start |
| HbPAL5 | TATA-box | TATA   | 443 | 4 | + | Arabidopsis thaliana | core promoter element around -30 of transcription start |
| HbPAL5 | TATA-box | TATAAA | 451 | 6 | - | Helianthus annuus    | core promoter element around -30 of transcription start |
| HbPAL5 | TATA-box | TATAA  | 452 | 5 | - | Arabidopsis thaliana | core promoter element around -30 of transcription start |
| HbPAL5 | TATA-box | TATA   | 453 | 4 | + | Arabidopsis thaliana | core promoter element around -30 of transcription start |
| HbPAL5 | TATA-box | TATAA  | 507 | 5 | - | Arabidopsis thaliana | core promoter element around -30 of transcription start |
| HbPAL5 | TATA-box | TATA   | 508 | 4 | + | Arabidopsis thaliana | core promoter element around -30 of transcription start |
| HbPAL5 | TATA-box | ATTATA | 648 | 6 | + | Brassica napus       | core promoter element around -30 of transcription start |



|        |          |            |      |   |   |                      |                                                         |
|--------|----------|------------|------|---|---|----------------------|---------------------------------------------------------|
| HbPAL5 | TATA-box | TATAA      | 649  | 5 | - | Arabidopsis thaliana | core promoter element around -30 of transcription start |
| HbPAL5 | TATA-box | TATA       | 650  | 4 | + | Arabidopsis thaliana | core promoter element around -30 of transcription start |
| HbPAL5 | TATA-box | ccTATAAAaa | 714  | 9 | - | Arabidopsis thaliana | core promoter element around -30 of transcription start |
| HbPAL5 | TATA-box | TATAAAA    | 715  | 7 | - | Pisum sativum        | core promoter element around -30 of transcription start |
| HbPAL5 | TATA-box | TATAAA     | 716  | 6 | - | Helianthus annuus    | core promoter element around -30 of transcription start |
| HbPAL5 | TATA-box | TATAA      | 717  | 5 | - | Arabidopsis thaliana | core promoter element around -30 of transcription start |
| HbPAL5 | TATA-box | TATA       | 718  | 4 | + | Arabidopsis thaliana | core promoter element around -30 of transcription start |
| HbPAL5 | TATA-box | TATA       | 738  | 4 | + | Arabidopsis thaliana | core promoter element around -30 of transcription start |
| HbPAL5 | TATA-box | taTATAAAtc | 753  | 9 | - | Arabidopsis thaliana | core promoter element around -30 of transcription start |
| HbPAL5 | TATA-box | TATTTAAA   | 755  | 8 | - | Arabidopsis thaliana | core promoter element around -30 of transcription start |
| HbPAL5 | TATA-box | TATACA     | 796  | 6 | - | Helianthus annuus    | core promoter element around -30 of transcription start |
| HbPAL5 | TATA-box | TATA       | 798  | 4 | + | Arabidopsis thaliana | core promoter element around -30 of transcription start |
| HbPAL5 | TATA-box | TATA       | 870  | 4 | + | Arabidopsis thaliana | core promoter element around -30 of transcription start |
| HbPAL5 | TATA-box | taTATAAAtc | 898  | 9 | - | Arabidopsis thaliana | core promoter element around -30 of transcription start |
| HbPAL5 | TATA-box | ATTATA     | 900  | 6 | + | Brassica napus       | core promoter element around -30 of transcription start |
| HbPAL5 | TATA-box | TATATAA    | 901  | 7 | - | Arabidopsis thaliana | core promoter element around -30 of transcription start |
| HbPAL5 | TATA-box | TATATA     | 902  | 6 | + | Arabidopsis thaliana | core promoter element around -30 of transcription start |
| HbPAL5 | TATA-box | ATATAT     | 903  | 6 | + | Brassica napus       | core promoter element around -30 of transcription start |
| HbPAL5 | TATA-box | TATATA     | 904  | 6 | + | Arabidopsis thaliana | core promoter element around -30 of transcription start |
| HbPAL5 | TATA-box | ATATAT     | 905  | 6 | + | Brassica napus       | core promoter element around -30 of transcription start |
| HbPAL5 | TATA-box | TATA       | 906  | 4 | + | Arabidopsis thaliana | core promoter element around -30 of transcription start |
| HbPAL5 | TATA-box | TATA       | 959  | 4 | + | Arabidopsis thaliana | core promoter element around -30 of transcription start |
| HbPAL5 | TATA-box | ATTATA     | 1209 | 6 | + | Brassica napus       | core promoter element around -30 of transcription start |
| HbPAL5 | TATA-box | TATAA      | 1210 | 5 | - | Arabidopsis thaliana | core promoter element around -30 of transcription start |
| HbPAL5 | TATA-box | TATA       | 1211 | 4 | - | Arabidopsis thaliana | core promoter element around -30 of transcription start |
| HbPAL5 | TATA-box | ATATAT     | 1229 | 6 | - | Brassica napus       | core promoter element around -30 of transcription start |

|        |          |               |      |    |   |                      |                                                         |
|--------|----------|---------------|------|----|---|----------------------|---------------------------------------------------------|
| HbPAL5 | TATA-box | TATATA        | 1230 | 6  | - | Arabidopsis thaliana | core promoter element around -30 of transcription start |
| HbPAL5 | TATA-box | ATATAA        | 1231 | 6  | + | Brassica oleracea    | core promoter element around -30 of transcription start |
| HbPAL5 | TATA-box | TATA          | 1232 | 4  | - | Arabidopsis thaliana | core promoter element around -30 of transcription start |
| HbPAL5 | TATA-box | TACAAAA       | 1271 | 7  | + | Oryza sativa         | core promoter element around -30 of transcription start |
| HbPAL5 | TATA-box | TATA          | 1399 | 4  | - | Arabidopsis thaliana | core promoter element around -30 of transcription start |
| HbPAL5 | TATA-box | TATAAAT       | 1403 | 7  | - | Brassica juncea      | core promoter element around -30 of transcription start |
| HbPAL5 | TATA-box | TATAAA        | 1404 | 6  | - | Helianthus annuus    | core promoter element around -30 of transcription start |
| HbPAL5 | TATA-box | TATAA         | 1405 | 5  | - | Arabidopsis thaliana | core promoter element around -30 of transcription start |
| HbPAL5 | TATA-box | TATA          | 1406 | 4  | - | Arabidopsis thaliana | core promoter element around -30 of transcription start |
| HbPAL5 | TATA-box | ATTATA        | 1480 | 6  | + | Brassica napus       | core promoter element around -30 of transcription start |
| HbPAL5 | TATA-box | TATATAA       | 1481 | 7  | - | Arabidopsis thaliana | core promoter element around -30 of transcription start |
| HbPAL5 | TATA-box | TATATA        | 1482 | 6  | - | Arabidopsis thaliana | core promoter element around -30 of transcription start |
| HbPAL5 | TATA-box | ATATAT        | 1483 | 6  | - | Brassica napus       | core promoter element around -30 of transcription start |
| HbPAL5 | TATA-box | TATATA        | 1484 | 6  | - | Arabidopsis thaliana | core promoter element around -30 of transcription start |
| HbPAL5 | TATA-box | ATATAT        | 1485 | 6  | - | Brassica napus       | core promoter element around -30 of transcription start |
| HbPAL5 | TATA-box | TATATA        | 1486 | 6  | - | Arabidopsis thaliana | core promoter element around -30 of transcription start |
| HbPAL5 | TATA-box | ATATAT        | 1487 | 6  | - | Brassica napus       | core promoter element around -30 of transcription start |
| HbPAL5 | TATA-box | TATATA        | 1488 | 6  | - | Arabidopsis thaliana | core promoter element around -30 of transcription start |
| HbPAL5 | TATA-box | ATATAT        | 1489 | 6  | - | Brassica napus       | core promoter element around -30 of transcription start |
| HbPAL5 | TATA-box | TATATA        | 1490 | 6  | - | Arabidopsis thaliana | core promoter element around -30 of transcription start |
| HbPAL5 | TATA-box | ATATAT        | 1491 | 6  | - | Brassica napus       | core promoter element around -30 of transcription start |
| HbPAL5 | TATA-box | TATATTTATATTT | 1492 | 12 | + | Avena sativa         | core promoter element around -30 of transcription start |
| HbPAL5 | TATA-box | ATATAT        | 1493 | 6  | - | Brassica napus       | core promoter element around -30 of transcription start |
| HbPAL5 | TATA-box | TATATA        | 1494 | 6  | - | Arabidopsis thaliana | core promoter element around -30 of transcription start |
| HbPAL5 | TATA-box | ATATAT        | 1495 | 6  | - | Brassica napus       | core promoter element around -30 of transcription start |
| HbPAL5 | TATA-box | TATATA        | 1496 | 6  | - | Arabidopsis thaliana | core promoter element around -30 of transcription start |

|        |             |           |      |   |   |                      |                                                                   |
|--------|-------------|-----------|------|---|---|----------------------|-------------------------------------------------------------------|
| HbPAL5 | TATA-box    | ATATAT    | 1497 | 6 | - | Brassica napus       | core promoter element around -30 of transcription start           |
| HbPAL5 | TATA-box    | TATA      | 1498 | 4 | - | Arabidopsis thaliana | core promoter element around -30 of transcription start           |
| HbPAL5 | TATA-box    | TATA      | 1579 | 4 | - | Arabidopsis thaliana | core promoter element around -30 of transcription start           |
| HbPAL5 | TATA-box    | TATAAAA   | 1590 | 7 | - | Pisum sativum        | core promoter element around -30 of transcription start           |
| HbPAL5 | TATA-box    | TATAAA    | 1591 | 6 | - | Helianthus annuus    | core promoter element around -30 of transcription start           |
| HbPAL5 | TATA-box    | TATATAA   | 1592 | 7 | - | Arabidopsis thaliana | core promoter element around -30 of transcription start           |
| HbPAL5 | TATA-box    | TATATA    | 1593 | 6 | - | Arabidopsis thaliana | core promoter element around -30 of transcription start           |
| HbPAL5 | TATA-box    | ATATAA    | 1594 | 6 | + | Brassica oleracea    | core promoter element around -30 of transcription start           |
| HbPAL5 | TATA-box    | TATA      | 1595 | 4 | - | Arabidopsis thaliana | core promoter element around -30 of transcription start           |
| HbPAL5 | TATA-box    | TATAAAA   | 1604 | 7 | - | Pisum sativum        | core promoter element around -30 of transcription start           |
| HbPAL5 | TATA-box    | TATAAA    | 1605 | 6 | - | Helianthus annuus    | core promoter element around -30 of transcription start           |
| HbPAL5 | TATA-box    | TATAA     | 1606 | 5 | - | Arabidopsis thaliana | core promoter element around -30 of transcription start           |
| HbPAL5 | TATA-box    | TATA      | 1607 | 4 | - | Arabidopsis thaliana | core promoter element around -30 of transcription start           |
| HbPAL5 | TATA-box    | ATTATA    | 1663 | 6 | + | Brassica napus       | core promoter element around -30 of transcription start           |
| HbPAL5 | TATA-box    | TATAA     | 1664 | 5 | - | Arabidopsis thaliana | core promoter element around -30 of transcription start           |
| HbPAL5 | TATA-box    | TATA      | 1665 | 4 | - | Arabidopsis thaliana | core promoter element around -30 of transcription start           |
| HbPAL5 | TATA-box    | TATTTAAA  | 1859 | 8 | + | Arabidopsis thaliana | core promoter element around -30 of transcription start           |
| HbPAL5 | TCCC-motif  | TCTCCCT   | 855  | 7 | - | Spinacia oleracea    | part of a light responsive element                                |
| HbPAL5 | TCCC-motif  | TCTCCCT   | 1307 | 7 | - | Spinacia oleracea    | part of a light responsive element                                |
| HbPAL5 | TCT-motif   | TCTTAC    | 1969 | 6 | + | Arabidopsis thaliana | part of a light responsive element                                |
| HbPAL5 | TGACG-motif | TGACG     | 1318 | 5 | + | Hordeum vulgare      | cis-acting regulatory element involved in the MeJA-responsiveness |
| HbPAL5 | TGACG-motif | TGACG     | 1783 | 5 | + | Hordeum vulgare      | cis-acting regulatory element involved in the MeJA-responsiveness |
| HbPAL5 | WUN-motif   | AAATTACTA | 1584 | 9 | - | Nicotiana glutinosa  | wound-responsive element                                          |
| HbPAL5 | WUN-motif   | AAATTACT  | 1585 | 8 | - | Nicotiana glutinosa  | wound-responsive element                                          |
| HbPAL6 | AAGAA-motif | GAAAGAA   | 1505 | 7 | + | Avena sativa         |                                                                   |
| HbPAL6 | AAGAA-motif | GAAAGAA   | 1544 | 7 | + | Avena sativa         |                                                                   |

|        |             |                                 |      |     |   |                      |                                                                     |
|--------|-------------|---------------------------------|------|-----|---|----------------------|---------------------------------------------------------------------|
| HbPAL6 | A-box       | CCGTCC                          | 1662 | 6   | + | Petroselinum crispum | cis-acting regulatory element                                       |
| HbPAL6 | AC-I        | (T/C)C(T/C)(C/T)ACC<br>(T/C)ACC | 1589 | 8.5 | + | Phaseolus vulgaris   |                                                                     |
| HbPAL6 | AC-II       | TCACCAACCCCC                    | 1591 | 11  | + | Populus tremuloides  |                                                                     |
| HbPAL6 | ARE         | AAACCA                          | 843  | 6   | + | Zea mays             | cis-acting regulatory element essential for the anaerobic induction |
| HbPAL6 | as-1        | TGACG                           | 5    | 5   | + | Arabidopsis thaliana |                                                                     |
| HbPAL6 | as-1        | TGACG                           | 30   | 5   | + | Arabidopsis thaliana |                                                                     |
| HbPAL6 | as-1        | TGACG                           | 76   | 5   | + | Arabidopsis thaliana |                                                                     |
| HbPAL6 | as-1        | TGACG                           | 101  | 5   | - | Arabidopsis thaliana |                                                                     |
| HbPAL6 | as-1        | TGACG                           | 148  | 5   | + | Arabidopsis thaliana |                                                                     |
| HbPAL6 | as-1        | TGACG                           | 207  | 5   | + | Arabidopsis thaliana |                                                                     |
| HbPAL6 | as-1        | TGACG                           | 1566 | 5   | + | Arabidopsis thaliana |                                                                     |
| HbPAL6 | AT~TATA-box | TATATA                          | 333  | 6   | + | Arabidopsis thaliana |                                                                     |
| HbPAL6 | AT~TATA-box | TATATAAA                        | 382  | 8   | - | Arabidopsis thaliana |                                                                     |
| HbPAL6 | AT~TATA-box | TATATA                          | 384  | 6   | + | Arabidopsis thaliana |                                                                     |
| HbPAL6 | AT~TATA-box | TATATA                          | 402  | 6   | + | Arabidopsis thaliana |                                                                     |
| HbPAL6 | AT~TATA-box | TATATA                          | 404  | 6   | + | Arabidopsis thaliana |                                                                     |
| HbPAL6 | AT~TATA-box | TATATAAA                        | 1144 | 8   | - | Arabidopsis thaliana |                                                                     |
| HbPAL6 | AT~TATA-box | TATATA                          | 1146 | 6   | - | Arabidopsis thaliana |                                                                     |
| HbPAL6 | AT~TATA-box | TATATA                          | 1148 | 6   | - | Arabidopsis thaliana |                                                                     |
| HbPAL6 | Box 4       | ATTAAT                          | 51   | 6   | + | Petroselinum crispum | part of a conserved DNA module involved in light responsiveness     |
| HbPAL6 | Box 4       | ATTAAT                          | 391  | 6   | + | Petroselinum crispum | part of a conserved DNA module involved in light responsiveness     |
| HbPAL6 | Box 4       | ATTAAT                          | 502  | 6   | + | Petroselinum crispum | part of a conserved DNA module involved in light responsiveness     |
| HbPAL6 | Box 4       | ATTAAT                          | 802  | 6   | + | Petroselinum crispum | part of a conserved DNA module involved in light responsiveness     |
| HbPAL6 | Box 4       | ATTAAT                          | 1208 | 6   | - | Petroselinum crispum | part of a conserved DNA module involved in light responsiveness     |
| HbPAL6 | CAAT-box    | CAAT                            | 322  | 4   | + | Nicotiana glutinosa  |                                                                     |

|        |          |       |      |   |   |                      |                                                            |
|--------|----------|-------|------|---|---|----------------------|------------------------------------------------------------|
| HbPAL6 | CAAT-box | CAAAT | 324  | 5 | - | Pisum sativum        | common cis-acting element in promoter and enhancer regions |
| HbPAL6 | CAAT-box | CAAAT | 588  | 5 | - | Pisum sativum        | common cis-acting element in promoter and enhancer regions |
| HbPAL6 | CAAT-box | CAAAT | 604  | 5 | - | Pisum sativum        | common cis-acting element in promoter and enhancer regions |
| HbPAL6 | CAAT-box | CAAAT | 786  | 5 | + | Pisum sativum        | common cis-acting element in promoter and enhancer regions |
| HbPAL6 | CAAT-box | CAAT  | 822  | 4 | - | Nicotiana glutinosa  |                                                            |
| HbPAL6 | CAAT-box | CAAT  | 906  | 4 | + | Nicotiana glutinosa  |                                                            |
| HbPAL6 | CAAT-box | CAAAT | 908  | 5 | - | Pisum sativum        | common cis-acting element in promoter and enhancer regions |
| HbPAL6 | CAAT-box | CAAT  | 918  | 4 | + | Nicotiana glutinosa  |                                                            |
| HbPAL6 | CAAT-box | CAAT  | 941  | 4 | + | Nicotiana glutinosa  |                                                            |
| HbPAL6 | CAAT-box | CAAT  | 950  | 4 | + | Nicotiana glutinosa  |                                                            |
| HbPAL6 | CAAT-box | CAAT  | 984  | 4 | - | Nicotiana glutinosa  |                                                            |
| HbPAL6 | CAAT-box | CAAAT | 1099 | 5 | + | Pisum sativum        | common cis-acting element in promoter and enhancer regions |
| HbPAL6 | CAAT-box | CAAT  | 1118 | 4 | + | Nicotiana glutinosa  |                                                            |
| HbPAL6 | CAAT-box | CAAT  | 1212 | 4 | - | Nicotiana glutinosa  |                                                            |
| HbPAL6 | CAAT-box | CAAAT | 1254 | 5 | - | Pisum sativum        | common cis-acting element in promoter and enhancer regions |
| HbPAL6 | CAAT-box | CAAT  | 1268 | 4 | - | Nicotiana glutinosa  |                                                            |
| HbPAL6 | CAAT-box | CAAAT | 1399 | 5 | - | Pisum sativum        | common cis-acting element in promoter and enhancer regions |
| HbPAL6 | CAAT-box | CAAAT | 1445 | 5 | - | Pisum sativum        | common cis-acting element in promoter and enhancer regions |
| HbPAL6 | CAAT-box | CCAAT | 1512 | 5 | - | Arabidopsis thaliana | common cis-acting element in promoter and enhancer regions |
| HbPAL6 | CAAT-box | CCAAT | 1631 | 5 | + | Arabidopsis thaliana | common cis-acting element in promoter and enhancer regions |
| HbPAL6 | CAAT-box | CAAT  | 1632 | 4 | + | Nicotiana glutinosa  |                                                            |
| HbPAL6 | CAAT-box | CCAAT | 1674 | 5 | + | Arabidopsis thaliana | common cis-acting element in promoter and enhancer regions |
| HbPAL6 | CAAT-box | CAAT  | 1675 | 4 | + | Nicotiana glutinosa  |                                                            |
| HbPAL6 | CAAT-box | CAAT  | 1717 | 4 | + | Nicotiana glutinosa  |                                                            |
| HbPAL6 | CAAT-box | CAAAT | 1719 | 5 | - | Pisum sativum        | common cis-acting element in promoter and enhancer regions |
| HbPAL6 | CAAT-box | CAAT  | 1827 | 4 | + | Nicotiana glutinosa  |                                                            |

|        |              |          |      |   |   |                       |                                                                   |
|--------|--------------|----------|------|---|---|-----------------------|-------------------------------------------------------------------|
| HbPAL6 | CAAT-box     | CAAT     | 1991 | 4 | + | Nicotiana glutinosa   |                                                                   |
| HbPAL6 | CCAAT-box    | CAACGG   | 16   | 6 | + | Hordeum vulgare       | MYBHv1 binding site                                               |
| HbPAL6 | CCGTCC motif | CCGTCC   | 1662 | 6 | + | Nicotiana tabacum     |                                                                   |
| HbPAL6 | CCGTCC-box   | CCGTCC   | 1662 | 6 | + | Petroselinum hortense |                                                                   |
| HbPAL6 | CGTCA-motif  | CGTCA    | 5    | 5 | - | Hordeum vulgare       | cis-acting regulatory element involved in the MeJA-responsiveness |
| HbPAL6 | CGTCA-motif  | CGTCA    | 30   | 5 | - | Hordeum vulgare       | cis-acting regulatory element involved in the MeJA-responsiveness |
| HbPAL6 | CGTCA-motif  | CGTCA    | 76   | 5 | - | Hordeum vulgare       | cis-acting regulatory element involved in the MeJA-responsiveness |
| HbPAL6 | CGTCA-motif  | CGTCA    | 101  | 5 | + | Hordeum vulgare       | cis-acting regulatory element involved in the MeJA-responsiveness |
| HbPAL6 | CGTCA-motif  | CGTCA    | 148  | 5 | - | Hordeum vulgare       | cis-acting regulatory element involved in the MeJA-responsiveness |
| HbPAL6 | CGTCA-motif  | CGTCA    | 207  | 5 | - | Hordeum vulgare       | cis-acting regulatory element involved in the MeJA-responsiveness |
| HbPAL6 | CGTCA-motif  | CGTCA    | 1566 | 5 | - | Hordeum vulgare       | cis-acting regulatory element involved in the MeJA-responsiveness |
| HbPAL6 | DRE core     | GCCGAC   | 1796 | 6 | - | Arabidopsis thaliana  | dehydration-responsive element                                    |
| HbPAL6 | ERE          | ATTTTAAA | 375  | 8 | - | Nicotiana glutinos    | ethylene-responsive element                                       |
| HbPAL6 | ERE          | ATTTTAAA | 1011 | 8 | + | Nicotiana glutinos    | ethylene-responsive element                                       |
| HbPAL6 | ERE          | ATTTTAAA | 1342 | 8 | - | Nicotiana glutinos    | ethylene-responsive element                                       |
| HbPAL6 | GT1-motif    | GGTTAA   | 1178 | 6 | + | Arabidopsis thaliana  | light responsive element                                          |
| HbPAL6 | GT1-motif    | GGTTAAT  | 1415 | 7 | - | Avena sativa          | light responsive element                                          |
| HbPAL6 | GT1-motif    | GGTTAA   | 1416 | 6 | - | Arabidopsis thaliana  | light responsive element                                          |
| HbPAL6 | MBS          | CAACTG   | 1878 | 6 | - | Arabidopsis thaliana  | MYB binding site involved in drought-inducibility                 |
| HbPAL6 | MRE          | AACCTAA  | 1650 | 7 | + | Petroselinum crispum  | MYB binding site involved in light responsiveness                 |
| HbPAL6 | MYB          | CAACCA   | 775  | 6 | - | Arabidopsis thaliana  | MYB binding site                                                  |
| HbPAL6 | MYB          | CAACCA   | 1529 | 6 | - | Arabidopsis thaliana  | MYB binding site                                                  |
| HbPAL6 | MYB          | TAACCA   | 1654 | 6 | + | Arabidopsis thaliana  | MYB binding site                                                  |
| HbPAL6 | Myb          | TAACTG   | 42   | 6 | + | Arabidopsis thaliana  | MYB binding site                                                  |
| HbPAL6 | Myb          | CAACTG   | 1878 | 6 | - | Arabidopsis thaliana  | MYB binding site                                                  |
| HbPAL6 | MYB          | CCGTTG   | 16   | 6 | - | Arabidopsis thaliana  | MYB binding site                                                  |

| recognition site |                   |            |      |   |   |                      |                                                                      |
|------------------|-------------------|------------|------|---|---|----------------------|----------------------------------------------------------------------|
| HbPAL6           | MYB-like sequence | TAACCA     | 1654 | 6 | + | Arabidopsis thaliana | MYB binding site                                                     |
| HbPAL6           | Myc               | TCTCTTA    | 474  | 7 | + | Arabidopsis thaliana | MYC binding site                                                     |
| HbPAL6           | MYC               | CATTTG     | 587  | 6 | + | Arabidopsis thaliana | MYC binding site                                                     |
| HbPAL6           | O2-site           | GATGACATGG | 1728 | 9 | - | Zea mays             | cis-acting regulatory element involved in zein metabolism regulation |
| HbPAL6           | STRE              | AGGGG      | 1744 | 5 | - | Arabidopsis thaliana |                                                                      |
| HbPAL6           | STRE              | AGGGG      | 1833 | 5 | - | Arabidopsis thaliana |                                                                      |
| HbPAL6           | TATA              | TATAAAAT   | 768  | 8 | + | Arabidopsis thaliana |                                                                      |
| HbPAL6           | TATA              | TATAAAAT   | 1194 | 8 | - | Arabidopsis thaliana |                                                                      |
| HbPAL6           | TATA-box          | TATAAAT    | 65   | 7 | - | Brassica juncea      | core promoter element around -30 of transcription start              |
| HbPAL6           | TATA-box          | TATAAA     | 66   | 6 | - | Helianthus annuus    | core promoter element around -30 of transcription start              |
| HbPAL6           | TATA-box          | TATAA      | 67   | 5 | - | Arabidopsis thaliana | core promoter element around -30 of transcription start              |
| HbPAL6           | TATA-box          | TATA       | 68   | 4 | + | Arabidopsis thaliana | core promoter element around -30 of transcription start              |
| HbPAL6           | TATA-box          | ATTATA     | 331  | 6 | + | Brassica napus       | core promoter element around -30 of transcription start              |
| HbPAL6           | TATA-box          | TATATAA    | 332  | 7 | - | Arabidopsis thaliana | core promoter element around -30 of transcription start              |
| HbPAL6           | TATA-box          | TATATA     | 333  | 6 | + | Arabidopsis thaliana | core promoter element around -30 of transcription start              |
| HbPAL6           | TATA-box          | ATATAA     | 334  | 6 | + | Brassica oleracea    | core promoter element around -30 of transcription start              |
| HbPAL6           | TATA-box          | TATA       | 335  | 4 | + | Arabidopsis thaliana | core promoter element around -30 of transcription start              |
| HbPAL6           | TATA-box          | taTATAAAtc | 380  | 9 | - | Arabidopsis thaliana | core promoter element around -30 of transcription start              |
| HbPAL6           | TATA-box          | TATAAAT    | 381  | 7 | - | Brassica juncea      | core promoter element around -30 of transcription start              |
| HbPAL6           | TATA-box          | TATAAA     | 382  | 6 | - | Helianthus annuus    | core promoter element around -30 of transcription start              |
| HbPAL6           | TATA-box          | TATATAA    | 383  | 7 | - | Arabidopsis thaliana | core promoter element around -30 of transcription start              |
| HbPAL6           | TATA-box          | TATATA     | 384  | 6 | + | Arabidopsis thaliana | core promoter element around -30 of transcription start              |
| HbPAL6           | TATA-box          | ATATAA     | 385  | 6 | + | Brassica oleracea    | core promoter element around -30 of transcription start              |

|        |          |         |     |   |   |                      |                                                         |
|--------|----------|---------|-----|---|---|----------------------|---------------------------------------------------------|
| HbPAL6 | TATA-box | TATA    | 386 | 4 | + | Arabidopsis thaliana | core promoter element around -30 of transcription start |
| HbPAL6 | TATA-box | ATTATA  | 400 | 6 | + | Brassica napus       | core promoter element around -30 of transcription start |
| HbPAL6 | TATA-box | TATATAA | 401 | 7 | - | Arabidopsis thaliana | core promoter element around -30 of transcription start |
| HbPAL6 | TATA-box | TATATA  | 402 | 6 | + | Arabidopsis thaliana | core promoter element around -30 of transcription start |
| HbPAL6 | TATA-box | ATATAT  | 403 | 6 | + | Brassica napus       | core promoter element around -30 of transcription start |
| HbPAL6 | TATA-box | TATATA  | 404 | 6 | + | Arabidopsis thaliana | core promoter element around -30 of transcription start |
| HbPAL6 | TATA-box | ATATAA  | 405 | 6 | + | Brassica oleracea    | core promoter element around -30 of transcription start |
| HbPAL6 | TATA-box | TATA    | 406 | 4 | + | Arabidopsis thaliana | core promoter element around -30 of transcription start |
| HbPAL6 | TATA-box | ATATAA  | 465 | 6 | + | Brassica oleracea    | core promoter element around -30 of transcription start |
| HbPAL6 | TATA-box | TATA    | 466 | 4 | + | Arabidopsis thaliana | core promoter element around -30 of transcription start |
| HbPAL6 | TATA-box | ATTATA  | 573 | 6 | + | Brassica napus       | core promoter element around -30 of transcription start |
| HbPAL6 | TATA-box | TATAA   | 574 | 5 | - | Arabidopsis thaliana | core promoter element around -30 of transcription start |
| HbPAL6 | TATA-box | TATA    | 575 | 4 | + | Arabidopsis thaliana | core promoter element around -30 of transcription start |
| HbPAL6 | TATA-box | TATA    | 740 | 4 | + | Arabidopsis thaliana | core promoter element around -30 of transcription start |
| HbPAL6 | TATA-box | ATATAT  | 750 | 6 | + | Brassica napus       | core promoter element around -30 of transcription start |
| HbPAL6 | TATA-box | TATA    | 751 | 4 | + | Arabidopsis thaliana | core promoter element around -30 of transcription start |
| HbPAL6 | TATA-box | ATATAA  | 767 | 6 | + | Brassica oleracea    | core promoter element around -30 of transcription start |
| HbPAL6 | TATA-box | TATA    | 768 | 4 | + | Arabidopsis thaliana | core promoter element around -30 of transcription start |
| HbPAL6 | TATA-box | ATATAA  | 797 | 6 | + | Brassica oleracea    | core promoter element around -30 of transcription start |
| HbPAL6 | TATA-box | TATA    | 798 | 4 | + | Arabidopsis thaliana | core promoter element around -30 of transcription start |
| HbPAL6 | TATA-box | TATA    | 882 | 4 | + | Arabidopsis thaliana | core promoter element around -30 of transcription start |
| HbPAL6 | TATA-box | ATTATA  | 889 | 6 | + | Brassica napus       | core promoter element around -30 of transcription start |
| HbPAL6 | TATA-box | TATAA   | 890 | 5 | - | Arabidopsis thaliana | core promoter element around -30 of transcription start |
| HbPAL6 | TATA-box | TATA    | 891 | 4 | + | Arabidopsis thaliana | core promoter element around -30 of transcription start |
| HbPAL6 | TATA-box | TATAAAA | 969 | 7 | - | Pisum sativum        | core promoter element around -30 of transcription start |
| HbPAL6 | TATA-box | TATAAA  | 970 | 6 | - | Helianthus annuus    | core promoter element around -30 of transcription start |



|        |          |             |      |   |   |                      |                                                         |
|--------|----------|-------------|------|---|---|----------------------|---------------------------------------------------------|
| HbPAL6 | TATA-box | TATAA       | 971  | 5 | - | Arabidopsis thaliana | core promoter element around -30 of transcription start |
| HbPAL6 | TATA-box | TATA        | 972  | 4 | + | Arabidopsis thaliana | core promoter element around -30 of transcription start |
| HbPAL6 | TATA-box | ATTATA      | 1110 | 6 | + | Brassica napus       | core promoter element around -30 of transcription start |
| HbPAL6 | TATA-box | TATAA       | 1111 | 5 | - | Arabidopsis thaliana | core promoter element around -30 of transcription start |
| HbPAL6 | TATA-box | TATA        | 1112 | 4 | - | Arabidopsis thaliana | core promoter element around -30 of transcription start |
| HbPAL6 | TATA-box | taTATAAAAtc | 1142 | 9 | - | Arabidopsis thaliana | core promoter element around -30 of transcription start |
| HbPAL6 | TATA-box | TATAAAT     | 1143 | 7 | - | Brassica juncea      | core promoter element around -30 of transcription start |
| HbPAL6 | TATA-box | TATAAA      | 1144 | 6 | - | Helianthus annuus    | core promoter element around -30 of transcription start |
| HbPAL6 | TATA-box | TATATAA     | 1145 | 7 | - | Arabidopsis thaliana | core promoter element around -30 of transcription start |
| HbPAL6 | TATA-box | TATATA      | 1146 | 6 | - | Arabidopsis thaliana | core promoter element around -30 of transcription start |
| HbPAL6 | TATA-box | ATATAT      | 1147 | 6 | - | Brassica napus       | core promoter element around -30 of transcription start |
| HbPAL6 | TATA-box | TATATA      | 1148 | 6 | - | Arabidopsis thaliana | core promoter element around -30 of transcription start |
| HbPAL6 | TATA-box | ATATAA      | 1149 | 6 | + | Brassica oleracea    | core promoter element around -30 of transcription start |
| HbPAL6 | TATA-box | TATA        | 1150 | 4 | - | Arabidopsis thaliana | core promoter element around -30 of transcription start |
| HbPAL6 | TATA-box | TATAAATA    | 1166 | 8 | - | Daucus carota        | core promoter element around -30 of transcription start |
| HbPAL6 | TATA-box | TATAAAT     | 1167 | 7 | - | Brassica juncea      | core promoter element around -30 of transcription start |
| HbPAL6 | TATA-box | TATAAA      | 1168 | 6 | - | Helianthus annuus    | core promoter element around -30 of transcription start |
| HbPAL6 | TATA-box | TATAA       | 1169 | 5 | - | Arabidopsis thaliana | core promoter element around -30 of transcription start |
| HbPAL6 | TATA-box | TATA        | 1170 | 4 | - | Arabidopsis thaliana | core promoter element around -30 of transcription start |
| HbPAL6 | TATA-box | TATAAAA     | 1195 | 7 | - | Pisum sativum        | core promoter element around -30 of transcription start |
| HbPAL6 | TATA-box | TATAAA      | 1196 | 6 | - | Helianthus annuus    | core promoter element around -30 of transcription start |
| HbPAL6 | TATA-box | TATAA       | 1197 | 5 | - | Arabidopsis thaliana | core promoter element around -30 of transcription start |
| HbPAL6 | TATA-box | TATA        | 1198 | 4 | - | Arabidopsis thaliana | core promoter element around -30 of transcription start |
| HbPAL6 | TATA-box | TATA        | 1285 | 4 | - | Arabidopsis thaliana | core promoter element around -30 of transcription start |
| HbPAL6 | TATA-box | ATTATA      | 1348 | 6 | + | Brassica napus       | core promoter element around -30 of transcription start |
| HbPAL6 | TATA-box | TATAA       | 1349 | 5 | - | Arabidopsis thaliana | core promoter element around -30 of transcription start |

|        |                 |            |      |   |   |                      |                                                                   |
|--------|-----------------|------------|------|---|---|----------------------|-------------------------------------------------------------------|
| HbPAL6 | TATA-box        | TATA       | 1350 | 4 | - | Arabidopsis thaliana | core promoter element around -30 of transcription start           |
| HbPAL6 | TATA-box        | ATATAT     | 1682 | 6 | - | Brassica napus       | core promoter element around -30 of transcription start           |
| HbPAL6 | TATA-box        | TATA       | 1683 | 4 | - | Arabidopsis thaliana | core promoter element around -30 of transcription start           |
| HbPAL6 | TATA-box        | taTATAAAtc | 1756 | 9 | + | Arabidopsis thaliana | core promoter element around -30 of transcription start           |
| HbPAL6 | TATA-box        | ATATAA     | 1757 | 6 | + | Brassica oleracea    | core promoter element around -30 of transcription start           |
| HbPAL6 | TATA-box        | TATA       | 1758 | 4 | - | Arabidopsis thaliana | core promoter element around -30 of transcription start           |
| HbPAL6 | TATA-box        | TATTTAAA   | 1860 | 8 | + | Arabidopsis thaliana | core promoter element around -30 of transcription start           |
| HbPAL6 | TATA-box        | TATA       | 1925 | 4 | - | Arabidopsis thaliana | core promoter element around -30 of transcription start           |
| HbPAL6 | TCCC-motif      | TCTCCCT    | 271  | 7 | + | Spinacia oleracea    | part of a light responsive element                                |
| HbPAL6 | TC-rich repeats | ATTCTCTAAC | 628  | 9 | - | Nicotiana tabacum    | cis-acting element involved in defense and stress responsiveness  |
| HbPAL6 | TCT-motif       | TCTTAC     | 700  | 6 | - | Arabidopsis thaliana | part of a light responsive element                                |
| HbPAL6 | TCT-motif       | TCTTAC     | 871  | 6 | - | Arabidopsis thaliana | part of a light responsive element                                |
| HbPAL6 | TCT-motif       | TCTTAC     | 1739 | 6 | + | Arabidopsis thaliana | part of a light responsive element                                |
| HbPAL6 | TGACG-motif     | TGACG      | 5    | 5 | + | Hordeum vulgare      | cis-acting regulatory element involved in the MeJA-responsiveness |
| HbPAL6 | TGACG-motif     | TGACG      | 30   | 5 | + | Hordeum vulgare      | cis-acting regulatory element involved in the MeJA-responsiveness |
| HbPAL6 | TGACG-motif     | TGACG      | 76   | 5 | + | Hordeum vulgare      | cis-acting regulatory element involved in the MeJA-responsiveness |
| HbPAL6 | TGACG-motif     | TGACG      | 101  | 5 | - | Hordeum vulgare      | cis-acting regulatory element involved in the MeJA-responsiveness |
| HbPAL6 | TGACG-motif     | TGACG      | 148  | 5 | + | Hordeum vulgare      | cis-acting regulatory element involved in the MeJA-responsiveness |
| HbPAL6 | TGACG-motif     | TGACG      | 207  | 5 | + | Hordeum vulgare      | cis-acting regulatory element involved in the MeJA-responsiveness |
| HbPAL6 | TGACG-motif     | TGACG      | 1566 | 5 | + | Hordeum vulgare      | cis-acting regulatory element involved in the MeJA-responsiveness |
| HbPAL6 | TGA-element     | AACGAC     | 190  | 6 | - | Brassica oleracea    | auxin-responsive element                                          |
| HbPAL6 | WRE3            | CCACCT     | 1974 | 6 | + | Pisum sativum        | wound-responsive element                                          |
| HbPAL6 | WUN-motif       | TTATTACAT  | 515  | 9 | + | Nicotiana glutinosa  | wound-responsive element                                          |
| HbPAL6 | WUN-motif       | AAATTTTCCT | 1912 | 9 | + | Brassica oleracea    | wound-responsive element                                          |
| HbPAL7 | ABRE            | ACGTG      | 978  | 5 | + | Arabidopsis thaliana | cis-acting element involved in the abscisic acid responsiveness   |
| HbPAL7 | ABRE3a          | TACGTG     | 977  | 6 | + | Zea mays             | cis-acting element involved in the abscisic acid responsiveness   |

|        |             |          |      |   |   |                      |                                                                     |
|--------|-------------|----------|------|---|---|----------------------|---------------------------------------------------------------------|
| HbPAL7 | ABRE4       | CACGTA   | 977  | 6 | - | Zea mays             | cis-acting element involved in the abscisic acid responsiveness     |
| HbPAL7 | ARE         | AAACCA   | 157  | 6 | - | Zea mays             | cis-acting regulatory element essential for the anaerobic induction |
| HbPAL7 | ARE         | AAACCA   | 216  | 6 | - | Zea mays             | cis-acting regulatory element essential for the anaerobic induction |
| HbPAL7 | ARE         | AAACCA   | 1729 | 6 | + | Zea mays             | cis-acting regulatory element essential for the anaerobic induction |
| HbPAL7 | as-1        | TGACG    | 248  | 5 | + | Arabidopsis thaliana |                                                                     |
| HbPAL7 | as-1        | TGACG    | 398  | 5 | + | Arabidopsis thaliana |                                                                     |
| HbPAL7 | as-1        | TGACG    | 1059 | 5 | + | Arabidopsis thaliana |                                                                     |
| HbPAL7 | AT~TATA-box | TATATA   | 734  | 6 | + | Arabidopsis thaliana |                                                                     |
| HbPAL7 | AT~TATA-box | TATATA   | 736  | 6 | + | Arabidopsis thaliana |                                                                     |
| HbPAL7 | AT~TATA-box | TATATAAA | 905  | 8 | - | Arabidopsis thaliana |                                                                     |
| HbPAL7 | AT~TATA-box | TATATA   | 907  | 6 | + | Arabidopsis thaliana |                                                                     |
| HbPAL7 | AT~TATA-box | TATATA   | 1018 | 6 | - | Arabidopsis thaliana |                                                                     |
| HbPAL7 | AT~TATA-box | TATATA   | 1020 | 6 | - | Arabidopsis thaliana |                                                                     |
| HbPAL7 | AT~TATA-box | TATATA   | 1022 | 6 | - | Arabidopsis thaliana |                                                                     |
| HbPAL7 | AT~TATA-box | TATATAAA | 1256 | 8 | - | Arabidopsis thaliana |                                                                     |
| HbPAL7 | AT~TATA-box | TATATA   | 1258 | 6 | - | Arabidopsis thaliana |                                                                     |
| HbPAL7 | AT~TATA-box | TATATAAA | 1295 | 8 | - | Arabidopsis thaliana |                                                                     |
| HbPAL7 | AT~TATA-box | TATATA   | 1297 | 6 | - | Arabidopsis thaliana |                                                                     |
| HbPAL7 | AT~TATA-box | TATATA   | 1350 | 6 | - | Arabidopsis thaliana |                                                                     |
| HbPAL7 | Box 4       | ATTAAT   | 833  | 6 | + | Petroselinum crispum | part of a conserved DNA module involved in light responsiveness     |
| HbPAL7 | Box 4       | ATTAAT   | 1086 | 6 | - | Petroselinum crispum | part of a conserved DNA module involved in light responsiveness     |
| HbPAL7 | box S       | AGCCACC  | 1561 | 7 | - | Arabidopsis thaliana |                                                                     |
| HbPAL7 | CAAT-box    | CAAT     | 103  | 4 | - | Nicotiana glutinosa  |                                                                     |
| HbPAL7 | CAAT-box    | CAAT     | 109  | 4 | - | Nicotiana glutinosa  |                                                                     |
| HbPAL7 | CAAT-box    | CAAT     | 135  | 4 | - | Nicotiana glutinosa  |                                                                     |
| HbPAL7 | CAAT-box    | CAAT     | 265  | 4 | - | Nicotiana glutinosa  |                                                                     |

|        |          |       |      |   |   |                      |                                                            |
|--------|----------|-------|------|---|---|----------------------|------------------------------------------------------------|
| HbPAL7 | CAAT-box | CAAT  | 282  | 4 | + | Nicotiana glutinosa  |                                                            |
| HbPAL7 | CAAT-box | CAAAT | 301  | 5 | - | Pisum sativum        | common cis-acting element in promoter and enhancer regions |
| HbPAL7 | CAAT-box | CAAT  | 351  | 4 | - | Nicotiana glutinosa  |                                                            |
| HbPAL7 | CAAT-box | CAAT  | 396  | 4 | - | Nicotiana glutinosa  |                                                            |
| HbPAL7 | CAAT-box | CCAAT | 413  | 5 | + | Arabidopsis thaliana | common cis-acting element in promoter and enhancer regions |
| HbPAL7 | CAAT-box | CAAT  | 414  | 4 | + | Nicotiana glutinosa  |                                                            |
| HbPAL7 | CAAT-box | CAAT  | 471  | 4 | + | Nicotiana glutinosa  |                                                            |
| HbPAL7 | CAAT-box | CAAT  | 481  | 4 | + | Nicotiana glutinosa  |                                                            |
| HbPAL7 | CAAT-box | CAAT  | 612  | 4 | - | Nicotiana glutinosa  |                                                            |
| HbPAL7 | CAAT-box | CAAT  | 619  | 4 | + | Nicotiana glutinosa  |                                                            |
| HbPAL7 | CAAT-box | CAAT  | 621  | 4 | - | Nicotiana glutinosa  |                                                            |
| HbPAL7 | CAAT-box | CAAT  | 704  | 4 | - | Nicotiana glutinosa  |                                                            |
| HbPAL7 | CAAT-box | CAAT  | 857  | 4 | - | Nicotiana glutinosa  |                                                            |
| HbPAL7 | CAAT-box | CAAT  | 898  | 4 | + | Nicotiana glutinosa  |                                                            |
| HbPAL7 | CAAT-box | CAAT  | 925  | 4 | + | Nicotiana glutinosa  |                                                            |
| HbPAL7 | CAAT-box | CAAT  | 997  | 4 | + | Nicotiana glutinosa  |                                                            |
| HbPAL7 | CAAT-box | CAAT  | 1003 | 4 | + | Nicotiana glutinosa  |                                                            |
| HbPAL7 | CAAT-box | CAAAT | 1080 | 5 | + | Pisum sativum        | common cis-acting element in promoter and enhancer regions |
| HbPAL7 | CAAT-box | CAAT  | 1173 | 4 | + | Nicotiana glutinosa  |                                                            |
| HbPAL7 | CAAT-box | CAAT  | 1188 | 4 | - | Nicotiana glutinosa  |                                                            |
| HbPAL7 | CAAT-box | CAAT  | 1216 | 4 | - | Nicotiana glutinosa  |                                                            |
| HbPAL7 | CAAT-box | CAAT  | 1236 | 4 | + | Nicotiana glutinosa  |                                                            |
| HbPAL7 | CAAT-box | CAAAT | 1306 | 5 | - | Pisum sativum        | common cis-acting element in promoter and enhancer regions |
| HbPAL7 | CAAT-box | CAAAT | 1375 | 5 | + | Pisum sativum        | common cis-acting element in promoter and enhancer regions |
| HbPAL7 | CAAT-box | CAAT  | 1407 | 4 | - | Nicotiana glutinosa  |                                                            |
| HbPAL7 | CAAT-box | CAAT  | 1416 | 4 | + | Nicotiana glutinosa  |                                                            |

|        |             |            |      |   |   |                            |                                                                   |
|--------|-------------|------------|------|---|---|----------------------------|-------------------------------------------------------------------|
| HbPAL7 | CAAT-box    | CCAAT      | 1445 | 5 | - | Arabidopsis thaliana       | common cis-acting element in promoter and enhancer regions        |
| HbPAL7 | CAAT-box    | CAAAT      | 1454 | 5 | + | Pisum sativum              | common cis-acting element in promoter and enhancer regions        |
| HbPAL7 | CAAT-box    | CAAT       | 1490 | 4 | - | Nicotiana glutinosa        |                                                                   |
| HbPAL7 | CAAT-box    | CAAT       | 1496 | 4 | - | Nicotiana glutinosa        |                                                                   |
| HbPAL7 | CAAT-box    | CAAAT      | 1503 | 5 | + | Pisum sativum              | common cis-acting element in promoter and enhancer regions        |
| HbPAL7 | CAAT-box    | CAAT       | 1535 | 4 | + | Nicotiana glutinosa        |                                                                   |
| HbPAL7 | CAAT-box    | CCAAT      | 1540 | 5 | + | Arabidopsis thaliana       | common cis-acting element in promoter and enhancer regions        |
| HbPAL7 | CAAT-box    | CAAT       | 1541 | 4 | + | Nicotiana glutinosa        |                                                                   |
| HbPAL7 | CAAT-box    | CAAT       | 1590 | 4 | + | Nicotiana glutinosa        |                                                                   |
| HbPAL7 | CAAT-box    | CAAAT      | 1660 | 5 | - | Pisum sativum              | common cis-acting element in promoter and enhancer regions        |
| HbPAL7 | CAAT-box    | CAAT       | 1668 | 4 | + | Nicotiana glutinosa        |                                                                   |
| HbPAL7 | CAAT-box    | CAAAT      | 1752 | 5 | + | Pisum sativum              | common cis-acting element in promoter and enhancer regions        |
| HbPAL7 | CAAT-box    | CAAAT      | 1775 | 5 | + | Pisum sativum              | common cis-acting element in promoter and enhancer regions        |
| HbPAL7 | CAAT-box    | CAAT       | 1914 | 4 | + | Nicotiana glutinosa        |                                                                   |
| HbPAL7 | CAAT-box    | CAAT       | 1920 | 4 | + | Nicotiana glutinosa        |                                                                   |
| HbPAL7 | CAAT-box    | CAAT       | 1938 | 4 | + | Nicotiana glutinosa        |                                                                   |
| HbPAL7 | CAAT-box    | CCAAT      | 1952 | 5 | + | Arabidopsis thaliana       | common cis-acting element in promoter and enhancer regions        |
| HbPAL7 | CAAT-box    | CAAT       | 1953 | 4 | + | Nicotiana glutinosa        |                                                                   |
| HbPAL7 | CAAT-box    | CAAT       | 1962 | 4 | + | Nicotiana glutinosa        |                                                                   |
| HbPAL7 | CGTCA-motif | CGTCA      | 248  | 5 | - | Hordeum vulgare            | cis-acting regulatory element involved in the MeJA-responsiveness |
| HbPAL7 | CGTCA-motif | CGTCA      | 398  | 5 | - | Hordeum vulgare            | cis-acting regulatory element involved in the MeJA-responsiveness |
| HbPAL7 | CGTCA-motif | CGTCA      | 1059 | 5 | - | Hordeum vulgare            | cis-acting regulatory element involved in the MeJA-responsiveness |
| HbPAL7 | circadian   | CAAAGATATC | 175  | 9 | + | Lycopersicon<br>esculentum | cis-acting regulatory element involved in circadian control       |
| HbPAL7 | DRE core    | GCCGAC     | 1370 | 6 | - | Arabidopsis thaliana       | dehydration-responsive element                                    |
| HbPAL7 | ERE         | ATTTTAAA   | 1045 | 8 | - | Nicotiana glutinos         | ethylene-responsive element                                       |

|        |                   |            |      |   |   |                      |                                                                      |
|--------|-------------------|------------|------|---|---|----------------------|----------------------------------------------------------------------|
| HbPAL7 | ERE               | ATTTTAAA   | 1280 | 8 | + | Nicotiana glutinos   | ethylene-responsive element                                          |
| HbPAL7 | ERE               | ATTTTAAA   | 1282 | 8 | - | Nicotiana glutinos   | ethylene-responsive element                                          |
| HbPAL7 | ERE               | ATTTTCATA  | 1596 | 8 | - | Nicotiana glutinos   | ethylene-responsive element                                          |
| HbPAL7 | GARE-motif        | TCTGTTG    | 330  | 7 | - | Brassica oleracea    | gibberellin-responsive element                                       |
| HbPAL7 | GATA-motif        | GATAGGA    | 649  | 7 | - | Arabidopsis thaliana | part of a light responsive element                                   |
| HbPAL7 | G-box             | TACGTG     | 977  | 6 | + | Arabidopsis thaliana | cis-acting regulatory element involved in light responsiveness       |
| HbPAL7 | GCN4_motif        | TGAGTCA    | 614  | 7 | + | Oryza sativa         | cis-regulatory element involved in endosperm expression              |
| HbPAL7 | LAMP-element      | CTTTATCA   | 1784 | 8 | - | Pisum sativum        | part of a light responsive element                                   |
| HbPAL7 | LTR               | CCGAAA     | 1052 | 6 | - | Hordeum vulgare      | cis-acting element involved in low-temperature responsiveness        |
| HbPAL7 | MYB               | TAACCA     | 17   | 6 | + | Arabidopsis thaliana | MYB binding site                                                     |
| HbPAL7 | MYB               | CAACAG     | 330  | 6 | + | Arabidopsis thaliana | MYB binding site                                                     |
| HbPAL7 | MYB               | CAACCA     | 1719 | 6 | + | Arabidopsis thaliana | MYB binding site                                                     |
| HbPAL7 | MYB               | CAACCA     | 1723 | 6 | + | Arabidopsis thaliana | MYB binding site                                                     |
| HbPAL7 | Myb               | TAACTG     | 728  | 6 | + | Arabidopsis thaliana | MYB binding site                                                     |
| HbPAL7 | Myb-binding site  | CAACAG     | 330  | 6 | + | Nicotiana tabacum    | MYB binding site                                                     |
| HbPAL7 | MYB-like sequence | TAACCA     | 17   | 6 | + | Arabidopsis thaliana | MYB binding site                                                     |
| HbPAL7 | MYC               | CAATTG     | 619  | 6 | + | Arabidopsis thaliana | MYC binding site                                                     |
| HbPAL7 | MYC               | CATTTG     | 1659 | 6 | + | Arabidopsis thaliana | MYC binding site                                                     |
| HbPAL7 | MYC               | CATGTG     | 1733 | 6 | + | Arabidopsis thaliana | MYC binding site                                                     |
| HbPAL7 | Myc               | TCTCTTA    | 960  | 7 | + | Arabidopsis thaliana | MYC binding site                                                     |
| HbPAL7 | O2-site           | GATGATGTGG | 91   | 9 | + | Zea mays             | cis-acting regulatory element involved in zein metabolism regulation |
| HbPAL7 | TATA              | TATAAAAT   | 903  | 8 | - | Arabidopsis thaliana |                                                                      |
| HbPAL7 | TATA              | TATAAAAT   | 946  | 8 | + | Arabidopsis thaliana |                                                                      |

|        |          |         |      |   |   |                      |                                                         |
|--------|----------|---------|------|---|---|----------------------|---------------------------------------------------------|
| HbPAL7 | TATA-box | ATATAT  | 131  | 6 | + | Brassica napus       | core promoter element around -30 of transcription start |
| HbPAL7 | TATA-box | TATA    | 132  | 4 | + | Arabidopsis thaliana | core promoter element around -30 of transcription start |
| HbPAL7 | TATA-box | TATA    | 298  | 4 | + | Arabidopsis thaliana | core promoter element around -30 of transcription start |
| HbPAL7 | TATA-box | TATA    | 695  | 4 | + | Arabidopsis thaliana | core promoter element around -30 of transcription start |
| HbPAL7 | TATA-box | TATACA  | 732  | 6 | - | Helianthus annuus    | core promoter element around -30 of transcription start |
| HbPAL7 | TATA-box | TATATA  | 734  | 6 | + | Arabidopsis thaliana | core promoter element around -30 of transcription start |
| HbPAL7 | TATA-box | ATATAT  | 735  | 6 | + | Brassica napus       | core promoter element around -30 of transcription start |
| HbPAL7 | TATA-box | TATATA  | 736  | 6 | + | Arabidopsis thaliana | core promoter element around -30 of transcription start |
| HbPAL7 | TATA-box | ATATAT  | 737  | 6 | + | Brassica napus       | core promoter element around -30 of transcription start |
| HbPAL7 | TATA-box | TATA    | 738  | 4 | + | Arabidopsis thaliana | core promoter element around -30 of transcription start |
| HbPAL7 | TATA-box | ATTATA  | 814  | 6 | + | Brassica napus       | core promoter element around -30 of transcription start |
| HbPAL7 | TATA-box | TATAA   | 815  | 5 | - | Arabidopsis thaliana | core promoter element around -30 of transcription start |
| HbPAL7 | TATA-box | TATA    | 816  | 4 | + | Arabidopsis thaliana | core promoter element around -30 of transcription start |
| HbPAL7 | TATA-box | ATTATA  | 843  | 6 | + | Brassica napus       | core promoter element around -30 of transcription start |
| HbPAL7 | TATA-box | TATAA   | 844  | 5 | - | Arabidopsis thaliana | core promoter element around -30 of transcription start |
| HbPAL7 | TATA-box | TATA    | 845  | 4 | + | Arabidopsis thaliana | core promoter element around -30 of transcription start |
| HbPAL7 | TATA-box | TATAAAA | 904  | 7 | - | Pisum sativum        | core promoter element around -30 of transcription start |
| HbPAL7 | TATA-box | TATAAA  | 905  | 6 | - | Helianthus annuus    | core promoter element around -30 of transcription start |
| HbPAL7 | TATA-box | TATATAA | 906  | 7 | - | Arabidopsis thaliana | core promoter element around -30 of transcription start |
| HbPAL7 | TATA-box | TATATA  | 907  | 6 | + | Arabidopsis thaliana | core promoter element around -30 of transcription start |
| HbPAL7 | TATA-box | ATATAT  | 908  | 6 | + | Brassica napus       | core promoter element around -30 of transcription start |
| HbPAL7 | TATA-box | TATA    | 909  | 4 | + | Arabidopsis thaliana | core promoter element around -30 of transcription start |
| HbPAL7 | TATA-box | TATAA   | 945  | 5 | - | Arabidopsis thaliana | core promoter element around -30 of transcription start |
| HbPAL7 | TATA-box | TATA    | 946  | 4 | + | Arabidopsis thaliana | core promoter element around -30 of transcription start |
| HbPAL7 | TATA-box | TATA    | 975  | 4 | + | Arabidopsis thaliana | core promoter element around -30 of transcription start |
| HbPAL7 | TATA-box | TATACA  | 1016 | 6 | - | Helianthus annuus    | core promoter element around -30 of transcription start |

|        |          |           |      |   |   |                            |                                                         |
|--------|----------|-----------|------|---|---|----------------------------|---------------------------------------------------------|
| HbPAL7 | TATA-box | TATATA    | 1018 | 6 | - | Arabidopsis thaliana       | core promoter element around -30 of transcription start |
| HbPAL7 | TATA-box | ATATAT    | 1019 | 6 | - | Brassica napus             | core promoter element around -30 of transcription start |
| HbPAL7 | TATA-box | TATATA    | 1020 | 6 | - | Arabidopsis thaliana       | core promoter element around -30 of transcription start |
| HbPAL7 | TATA-box | ATATAT    | 1021 | 6 | - | Brassica napus             | core promoter element around -30 of transcription start |
| HbPAL7 | TATA-box | TATATA    | 1022 | 6 | - | Arabidopsis thaliana       | core promoter element around -30 of transcription start |
| HbPAL7 | TATA-box | ATATAA    | 1023 | 6 | + | Brassica oleracea          | core promoter element around -30 of transcription start |
| HbPAL7 | TATA-box | TATA      | 1024 | 4 | - | Arabidopsis thaliana       | core promoter element around -30 of transcription start |
| HbPAL7 | TATA-box | TATAAA    | 1034 | 6 | - | Helianthus annuus          | core promoter element around -30 of transcription start |
| HbPAL7 | TATA-box | TATAA     | 1035 | 5 | - | Arabidopsis thaliana       | core promoter element around -30 of transcription start |
| HbPAL7 | TATA-box | TATA      | 1036 | 4 | - | Arabidopsis thaliana       | core promoter element around -30 of transcription start |
| HbPAL7 | TATA-box | TATA      | 1150 | 4 | - | Arabidopsis thaliana       | core promoter element around -30 of transcription start |
| HbPAL7 | TATA-box | ATATAA    | 1198 | 6 | + | Brassica oleracea          | core promoter element around -30 of transcription start |
| HbPAL7 | TATA-box | TATA      | 1199 | 4 | - | Arabidopsis thaliana       | core promoter element around -30 of transcription start |
| HbPAL7 | TATA-box | ATATAT    | 1212 | 6 | - | Brassica napus             | core promoter element around -30 of transcription start |
| HbPAL7 | TATA-box | TATA      | 1213 | 4 | - | Arabidopsis thaliana       | core promoter element around -30 of transcription start |
| HbPAL7 | TATA-box | TATACA    | 1218 | 6 | - | Helianthus annuus          | core promoter element around -30 of transcription start |
| HbPAL7 | TATA-box | TATA      | 1220 | 4 | - | Arabidopsis thaliana       | core promoter element around -30 of transcription start |
| HbPAL7 | TATA-box | TATA      | 1243 | 4 | - | Arabidopsis thaliana       | core promoter element around -30 of transcription start |
| HbPAL7 | TATA-box | taTATAAAg | 1255 | 9 | - | Lycopersicon<br>esculentum | core promoter element around -30 of transcription start |
| HbPAL7 | TATA-box | TATAAA    | 1256 | 6 | - | Helianthus annuus          | core promoter element around -30 of transcription start |
| HbPAL7 | TATA-box | TATATAA   | 1257 | 7 | - | Arabidopsis thaliana       | core promoter element around -30 of transcription start |
| HbPAL7 | TATA-box | TATATA    | 1258 | 6 | - | Arabidopsis thaliana       | core promoter element around -30 of transcription start |
| HbPAL7 | TATA-box | ATATAA    | 1259 | 6 | + | Brassica oleracea          | core promoter element around -30 of transcription start |
| HbPAL7 | TATA-box | TATA      | 1260 | 4 | - | Arabidopsis thaliana       | core promoter element around -30 of transcription start |
| HbPAL7 | TATA-box | TATA      | 1272 | 4 | - | Arabidopsis thaliana       | core promoter element around -30 of transcription start |



|        |             |             |      |    |   |                      |                                                                   |
|--------|-------------|-------------|------|----|---|----------------------|-------------------------------------------------------------------|
| HbPAL7 | TATA-box    | taTATAAAAtc | 1293 | 9  | - | Arabidopsis thaliana | core promoter element around -30 of transcription start           |
| HbPAL7 | TATA-box    | TATAAAT     | 1294 | 7  | - | Brassica juncea      | core promoter element around -30 of transcription start           |
| HbPAL7 | TATA-box    | TATAAA      | 1295 | 6  | - | Helianthus annuus    | core promoter element around -30 of transcription start           |
| HbPAL7 | TATA-box    | TATATAA     | 1296 | 7  | - | Arabidopsis thaliana | core promoter element around -30 of transcription start           |
| HbPAL7 | TATA-box    | TATATA      | 1297 | 6  | - | Arabidopsis thaliana | core promoter element around -30 of transcription start           |
| HbPAL7 | TATA-box    | ATATAA      | 1298 | 6  | + | Brassica oleracea    | core promoter element around -30 of transcription start           |
| HbPAL7 | TATA-box    | TATA        | 1299 | 4  | - | Arabidopsis thaliana | core promoter element around -30 of transcription start           |
| HbPAL7 | TATA-box    | ATATAT      | 1349 | 6  | - | Brassica napus       | core promoter element around -30 of transcription start           |
| HbPAL7 | TATA-box    | TATATA      | 1350 | 6  | - | Arabidopsis thaliana | core promoter element around -30 of transcription start           |
| HbPAL7 | TATA-box    | ATATAT      | 1351 | 6  | - | Brassica napus       | core promoter element around -30 of transcription start           |
| HbPAL7 | TATA-box    | TATA        | 1352 | 4  | - | Arabidopsis thaliana | core promoter element around -30 of transcription start           |
| HbPAL7 | TATA-box    | ATATAA      | 1471 | 6  | + | Brassica oleracea    | core promoter element around -30 of transcription start           |
| HbPAL7 | TATA-box    | TATA        | 1472 | 4  | - | Arabidopsis thaliana | core promoter element around -30 of transcription start           |
| HbPAL7 | TATA-box    | TATA        | 1615 | 4  | - | Arabidopsis thaliana | core promoter element around -30 of transcription start           |
| HbPAL7 | TATA-box    | ATTATA      | 1699 | 6  | + | Brassica napus       | core promoter element around -30 of transcription start           |
| HbPAL7 | TATA-box    | TATAA       | 1700 | 5  | - | Arabidopsis thaliana | core promoter element around -30 of transcription start           |
| HbPAL7 | TATA-box    | TATA        | 1701 | 4  | - | Arabidopsis thaliana | core promoter element around -30 of transcription start           |
| HbPAL7 | TATA-box    | ATATAA      | 1792 | 6  | + | Brassica oleracea    | core promoter element around -30 of transcription start           |
| HbPAL7 | TATA-box    | TATA        | 1793 | 4  | - | Arabidopsis thaliana | core promoter element around -30 of transcription start           |
| HbPAL7 | TATA-box    | ATTATA      | 1810 | 6  | + | Brassica napus       | core promoter element around -30 of transcription start           |
| HbPAL7 | TATA-box    | TATAA       | 1811 | 5  | - | Arabidopsis thaliana | core promoter element around -30 of transcription start           |
| HbPAL7 | TATA-box    | TATA        | 1812 | 4  | - | Arabidopsis thaliana | core promoter element around -30 of transcription start           |
| HbPAL7 | TATA-box    | TATA        | 1883 | 4  | - | Arabidopsis thaliana | core promoter element around -30 of transcription start           |
| HbPAL7 | TCA         | TCATCTTCAT  | 1335 | 10 | + | Pisum sativum        |                                                                   |
| HbPAL7 | TGACG-motif | TGACG       | 248  | 5  | + | Hordeum vulgare      | cis-acting regulatory element involved in the MeJA-responsiveness |
| HbPAL7 | TGACG-motif | TGACG       | 398  | 5  | + | Hordeum vulgare      | cis-acting regulatory element involved in the MeJA-responsiveness |

|        |             |              |      |    |   |                      |                                                                     |
|--------|-------------|--------------|------|----|---|----------------------|---------------------------------------------------------------------|
| HbPAL7 | TGACG-motif | TGACG        | 1059 | 5  | + | Hordeum vulgare      | cis-acting regulatory element involved in the MeJA-responsiveness   |
| HbPAL7 | W box       | TTGACC       | 1587 | 6  | - | Arabidopsis thaliana | WRKY binding site                                                   |
| HbPAL7 | W box       | TTGACC       | 1665 | 6  | - | Arabidopsis thaliana | WRKY binding site                                                   |
| HbPAL7 | WUN-motif   | AAATTCCT     | 423  | 9  | - | Brassica oleracea    | wound-responsive element                                            |
| HbPAL8 | AAGAA-motif | gGTAAAGAAA   | 1423 | 9  | + | Avena sativa         |                                                                     |
| HbPAL8 | AAGAA-motif | gGTAAAGAAA   | 1668 | 9  | - | Avena sativa         |                                                                     |
| HbPAL8 | ARE         | AAACCA       | 48   | 6  | + | Zea mays             | cis-acting regulatory element essential for the anaerobic induction |
| HbPAL8 | ARE         | AAACCA       | 209  | 6  | - | Zea mays             | cis-acting regulatory element essential for the anaerobic induction |
| HbPAL8 | AT~TATA-box | TATATA       | 1204 | 6  | - | Arabidopsis thaliana |                                                                     |
| HbPAL8 | AT1-motif   | AATTATTTTATT | 1476 | 13 | + | Solanum tuberosum    | part of a light responsive module                                   |
| HbPAL8 | AT1-motif   | AATTATTTTATT | 1596 | 14 | - | Solanum tuberosum    | part of a light responsive module                                   |
| HbPAL8 | Box 4       | ATTAAT       | 1096 | 6  | - | Petroselinum crispum | part of a conserved DNA module involved in light responsiveness     |
| HbPAL8 | Box 4       | ATTAAT       | 1100 | 6  | - | Petroselinum crispum | part of a conserved DNA module involved in light responsiveness     |
| HbPAL8 | Box 4       | ATTAAT       | 1581 | 6  | - | Petroselinum crispum | part of a conserved DNA module involved in light responsiveness     |
| HbPAL8 | CAAT-box    | CAAT         | 5    | 4  | + | Nicotiana glutinosa  |                                                                     |
| HbPAL8 | CAAT-box    | CAAAT        | 34   | 5  | - | Pisum sativum        | common cis-acting element in promoter and enhancer regions          |
| HbPAL8 | CAAT-box    | CAAT         | 71   | 4  | + | Nicotiana glutinosa  |                                                                     |
| HbPAL8 | CAAT-box    | CAAT         | 83   | 4  | + | Nicotiana glutinosa  |                                                                     |
| HbPAL8 | CAAT-box    | CAAAT        | 88   | 5  | - | Pisum sativum        | common cis-acting element in promoter and enhancer regions          |
| HbPAL8 | CAAT-box    | CAAT         | 119  | 4  | + | Nicotiana glutinosa  |                                                                     |
| HbPAL8 | CAAT-box    | CAAT         | 126  | 4  | - | Nicotiana glutinosa  |                                                                     |
| HbPAL8 | CAAT-box    | CAAT         | 196  | 4  | - | Nicotiana glutinosa  |                                                                     |
| HbPAL8 | CAAT-box    | CAAAT        | 215  | 5  | + | Pisum sativum        | common cis-acting element in promoter and enhancer regions          |
| HbPAL8 | CAAT-box    | CAAAT        | 338  | 5  | + | Pisum sativum        | common cis-acting element in promoter and enhancer regions          |
| HbPAL8 | CAAT-box    | CAAAT        | 459  | 5  | - | Pisum sativum        | common cis-acting element in promoter and enhancer regions          |
| HbPAL8 | CAAT-box    | CAAT         | 537  | 4  | + | Nicotiana glutinosa  |                                                                     |

|        |            |           |      |   |   |                      |                                                                |
|--------|------------|-----------|------|---|---|----------------------|----------------------------------------------------------------|
| HbPAL8 | CAAT-box   | CAAAT     | 542  | 5 | + | Pisum sativum        | common cis-acting element in promoter and enhancer regions     |
| HbPAL8 | CAAT-box   | CAAT      | 694  | 4 | - | Nicotiana glutinosa  |                                                                |
| HbPAL8 | CAAT-box   | CAAAT     | 716  | 5 | - | Pisum sativum        | common cis-acting element in promoter and enhancer regions     |
| HbPAL8 | CAAT-box   | CAAT      | 775  | 4 | + | Nicotiana glutinosa  |                                                                |
| HbPAL8 | CAAT-box   | CCAAT     | 822  | 5 | + | Arabidopsis thaliana | common cis-acting element in promoter and enhancer regions     |
| HbPAL8 | CAAT-box   | CAAT      | 823  | 4 | + | Nicotiana glutinosa  |                                                                |
| HbPAL8 | CAAT-box   | CAAT      | 998  | 4 | - | Nicotiana glutinosa  |                                                                |
| HbPAL8 | CAAT-box   | CAAAT     | 1009 | 5 | - | Pisum sativum        | common cis-acting element in promoter and enhancer regions     |
| HbPAL8 | CAAT-box   | CAAT      | 1016 | 4 | - | Nicotiana glutinosa  |                                                                |
| HbPAL8 | CAAT-box   | CAAAT     | 1111 | 5 | + | Pisum sativum        | common cis-acting element in promoter and enhancer regions     |
| HbPAL8 | CAAT-box   | CAAT      | 1135 | 4 | - | Nicotiana glutinosa  |                                                                |
| HbPAL8 | CAAT-box   | CAAT      | 1299 | 4 | - | Nicotiana glutinosa  |                                                                |
| HbPAL8 | CAAT-box   | CAAAT     | 1337 | 5 | + | Pisum sativum        | common cis-acting element in promoter and enhancer regions     |
| HbPAL8 | CAAT-box   | CAAAT     | 1340 | 5 | - | Pisum sativum        | common cis-acting element in promoter and enhancer regions     |
| HbPAL8 | CAAT-box   | CAAT      | 1696 | 4 | + | Nicotiana glutinosa  |                                                                |
| HbPAL8 | CAAT-box   | CAAT      | 1844 | 4 | - | Nicotiana glutinosa  |                                                                |
| HbPAL8 | CAAT-box   | CCAAT     | 1901 | 5 | + | Arabidopsis thaliana | common cis-acting element in promoter and enhancer regions     |
| HbPAL8 | CAAT-box   | CAAT      | 1902 | 4 | + | Nicotiana glutinosa  |                                                                |
| HbPAL8 | CAAT-box   | CAAAT     | 1954 | 5 | + | Pisum sativum        | common cis-acting element in promoter and enhancer regions     |
| HbPAL8 | CAAT-box   | CAAT      | 1979 | 4 | + | Nicotiana glutinosa  |                                                                |
| HbPAL8 | ERE        | ATTTTAAA  | 1569 | 8 | - | Nicotiana glutinos   | ethylene-responsive element                                    |
| HbPAL8 | GATA-motif | GATAGGA   | 802  | 7 | - | Arabidopsis thaliana | part of a light responsive element                             |
| HbPAL8 | G-box      | CACGAC    | 571  | 6 | + | Zea mays             | cis-acting regulatory element involved in light responsiveness |
| HbPAL8 | GT1-motif  | GGTTAA    | 134  | 6 | + | Arabidopsis thaliana | light responsive element                                       |
| HbPAL8 | GT1-motif  | GTGTGTGAA | 497  | 9 | + | Solanum tuberosum    | light responsive element                                       |
| HbPAL8 | MRE        | AACCTAA   | 648  | 7 | - | Petroselinum crispum | MYB binding site involved in light responsiveness              |

|        |                      |            |      |   |   |                      |                                                                         |
|--------|----------------------|------------|------|---|---|----------------------|-------------------------------------------------------------------------|
| HbPAL8 | Myb                  | TAACTG     | 840  | 6 | + | Arabidopsis thaliana | MYB binding site                                                        |
| HbPAL8 | Myb                  | TAACTG     | 893  | 6 | - | Arabidopsis thaliana | MYB binding site                                                        |
| HbPAL8 | Myb                  | TAACTG     | 980  | 6 | - | Arabidopsis thaliana | MYB binding site                                                        |
| HbPAL8 | MYB                  | CAACCA     | 103  | 6 | - | Arabidopsis thaliana | MYB binding site                                                        |
| HbPAL8 | MYB                  | TAACCA     | 191  | 6 | + | Arabidopsis thaliana | MYB binding site                                                        |
| HbPAL8 | MYB                  | CAACCA     | 379  | 6 | - | Arabidopsis thaliana | MYB binding site                                                        |
| HbPAL8 | MYB-like<br>sequence | TAACCA     | 191  | 6 | + | Arabidopsis thaliana | MYB binding site                                                        |
| HbPAL8 | MYC                  | CATTTG     | 33   | 6 | + | Arabidopsis thaliana | MYC binding site                                                        |
| HbPAL8 | MYC                  | CATGTG     | 424  | 6 | + | Arabidopsis thaliana | MYC binding site                                                        |
| HbPAL8 | MYC                  | CATTTG     | 542  | 6 | - | Arabidopsis thaliana | MYC binding site                                                        |
| HbPAL8 | MYC                  | CATTTG     | 715  | 6 | + | Arabidopsis thaliana | MYC binding site                                                        |
| HbPAL8 | O2-site              | GATGACATGG | 627  | 9 | - | Zea mays             | cis-acting regulatory element involved in zein metabolism<br>regulation |
| HbPAL8 | STRE                 | AGGGG      | 349  | 5 | + | Arabidopsis thaliana |                                                                         |
| HbPAL8 | TATA                 | TATAAAAT   | 1607 | 8 | - | Arabidopsis thaliana |                                                                         |
| HbPAL8 | TATA-box             | ATTATA     | 231  | 6 | + | Brassica napus       | core promoter element around -30 of transcription start                 |
| HbPAL8 | TATA-box             | TATAA      | 232  | 5 | - | Arabidopsis thaliana | core promoter element around -30 of transcription start                 |
| HbPAL8 | TATA-box             | TATA       | 233  | 4 | + | Arabidopsis thaliana | core promoter element around -30 of transcription start                 |
| HbPAL8 | TATA-box             | ccTATAAAaa | 261  | 9 | - | Arabidopsis thaliana | core promoter element around -30 of transcription start                 |
| HbPAL8 | TATA-box             | TATAAAA    | 262  | 7 | - | Pisum sativum        | core promoter element around -30 of transcription start                 |
| HbPAL8 | TATA-box             | TATAAA     | 263  | 6 | - | Helianthus annuus    | core promoter element around -30 of transcription start                 |
| HbPAL8 | TATA-box             | TATAA      | 264  | 5 | - | Arabidopsis thaliana | core promoter element around -30 of transcription start                 |
| HbPAL8 | TATA-box             | TATA       | 265  | 4 | + | Arabidopsis thaliana | core promoter element around -30 of transcription start                 |
| HbPAL8 | TATA-box             | TATA       | 681  | 4 | + | Arabidopsis thaliana | core promoter element around -30 of transcription start                 |
| HbPAL8 | TATA-box             | TATA       | 768  | 4 | + | Arabidopsis thaliana | core promoter element around -30 of transcription start                 |

|        |          |          |      |   |   |                      |                                                         |
|--------|----------|----------|------|---|---|----------------------|---------------------------------------------------------|
| HbPAL8 | TATA-box | TATAAAA  | 946  | 7 | - | Pisum sativum        | core promoter element around -30 of transcription start |
| HbPAL8 | TATA-box | TATAAA   | 947  | 6 | - | Helianthus annuus    | core promoter element around -30 of transcription start |
| HbPAL8 | TATA-box | TATAA    | 948  | 5 | - | Arabidopsis thaliana | core promoter element around -30 of transcription start |
| HbPAL8 | TATA-box | TATA     | 949  | 4 | + | Arabidopsis thaliana | core promoter element around -30 of transcription start |
| HbPAL8 | TATA-box | ATATAT   | 1066 | 6 | - | Brassica napus       | core promoter element around -30 of transcription start |
| HbPAL8 | TATA-box | TATA     | 1067 | 4 | - | Arabidopsis thaliana | core promoter element around -30 of transcription start |
| HbPAL8 | TATA-box | ATATAA   | 1077 | 6 | + | Brassica oleracea    | core promoter element around -30 of transcription start |
| HbPAL8 | TATA-box | TATA     | 1078 | 4 | - | Arabidopsis thaliana | core promoter element around -30 of transcription start |
| HbPAL8 | TATA-box | TATA     | 1156 | 4 | - | Arabidopsis thaliana | core promoter element around -30 of transcription start |
| HbPAL8 | TATA-box | ATTATA   | 1184 | 6 | + | Brassica napus       | core promoter element around -30 of transcription start |
| HbPAL8 | TATA-box | TATAA    | 1185 | 5 | - | Arabidopsis thaliana | core promoter element around -30 of transcription start |
| HbPAL8 | TATA-box | TATA     | 1186 | 4 | - | Arabidopsis thaliana | core promoter element around -30 of transcription start |
| HbPAL8 | TATA-box | ATTATA   | 1202 | 6 | + | Brassica napus       | core promoter element around -30 of transcription start |
| HbPAL8 | TATA-box | TATATAA  | 1203 | 7 | - | Arabidopsis thaliana | core promoter element around -30 of transcription start |
| HbPAL8 | TATA-box | TATATA   | 1204 | 6 | - | Arabidopsis thaliana | core promoter element around -30 of transcription start |
| HbPAL8 | TATA-box | ATATAT   | 1205 | 6 | - | Brassica napus       | core promoter element around -30 of transcription start |
| HbPAL8 | TATA-box | TATA     | 1206 | 4 | - | Arabidopsis thaliana | core promoter element around -30 of transcription start |
| HbPAL8 | TATA-box | TATA     | 1269 | 4 | - | Arabidopsis thaliana | core promoter element around -30 of transcription start |
| HbPAL8 | TATA-box | TAAAGATT | 1284 | 8 | + | Arabidopsis thaliana | core promoter element around -30 of transcription start |
| HbPAL8 | TATA-box | TATA     | 1310 | 4 | - | Arabidopsis thaliana | core promoter element around -30 of transcription start |
| HbPAL8 | TATA-box | ATATAA   | 1469 | 6 | + | Brassica oleracea    | core promoter element around -30 of transcription start |
| HbPAL8 | TATA-box | TATA     | 1470 | 4 | - | Arabidopsis thaliana | core promoter element around -30 of transcription start |
| HbPAL8 | TATA-box | TATTTAAA | 1535 | 8 | - | Arabidopsis thaliana | core promoter element around -30 of transcription start |
| HbPAL8 | TATA-box | TATTTAAA | 1567 | 8 | + | Arabidopsis thaliana | core promoter element around -30 of transcription start |
| HbPAL8 | TATA-box | ATTATA   | 1588 | 6 | + | Brassica napus       | core promoter element around -30 of transcription start |
| HbPAL8 | TATA-box | TATAA    | 1589 | 5 | - | Arabidopsis thaliana | core promoter element around -30 of transcription start |

|        |                 |            |      |   |   |                      |                                                                  |
|--------|-----------------|------------|------|---|---|----------------------|------------------------------------------------------------------|
| HbPAL8 | TATA-box        | TATA       | 1590 | 4 | - | Arabidopsis thaliana | core promoter element around -30 of transcription start          |
| HbPAL8 | TATA-box        | TATAAAA    | 1608 | 7 | - | Pisum sativum        | core promoter element around -30 of transcription start          |
| HbPAL8 | TATA-box        | TATAAA     | 1609 | 6 | - | Helianthus annuus    | core promoter element around -30 of transcription start          |
| HbPAL8 | TATA-box        | TATAA      | 1610 | 5 | - | Arabidopsis thaliana | core promoter element around -30 of transcription start          |
| HbPAL8 | TATA-box        | TATA       | 1611 | 4 | - | Arabidopsis thaliana | core promoter element around -30 of transcription start          |
| HbPAL8 | TATA-box        | ATATAT     | 1662 | 6 | - | Brassica napus       | core promoter element around -30 of transcription start          |
| HbPAL8 | TATA-box        | TATA       | 1663 | 4 | - | Arabidopsis thaliana | core promoter element around -30 of transcription start          |
| HbPAL8 | TATA-box        | ATATAT     | 1778 | 6 | - | Brassica napus       | core promoter element around -30 of transcription start          |
| HbPAL8 | TATA-box        | TATA       | 1779 | 4 | - | Arabidopsis thaliana | core promoter element around -30 of transcription start          |
| HbPAL8 | TCA             | TCATCTTCAT | 364  | 9 | - | Pisum sativum        |                                                                  |
| HbPAL8 | TCA             | TCATCTTCAT | 385  | 9 | - | Pisum sativum        |                                                                  |
| HbPAL8 | TCA             | TCATCTTCAT | 391  | 9 | - | Pisum sativum        |                                                                  |
| HbPAL8 | TC-rich repeats | ATTCTCTAAC | 1932 | 9 | - | Nicotiana tabacum    | cis-acting element involved in defense and stress responsiveness |
| HbPAL8 | TCT-motif       | TCTTAC     | 1168 | 6 | + | Arabidopsis thaliana | part of a light responsive element                               |
| HbPAL8 | W box           | TTGACC     | 1342 | 6 | + | Arabidopsis thaliana | WRKY binding site                                                |

**Table S3.** List of primer sequences used for qRT-PCR analysis.

| Gene          | Primer sequence (5'-3')    | Primer length (bp) | PCR product size (bp) | Primer efficiency |
|---------------|----------------------------|--------------------|-----------------------|-------------------|
| <i>HbPAL1</i> | F: TTGAGTCGTGTTGTGTGGTATC  | 22                 | 86                    | 1.06              |
|               | R: AGAAGGTGGGAATGGGGTTT    | 20                 |                       |                   |
| <i>HbPAL2</i> | F: TGAAGCACGCAGTCAAAAAC    | 20                 | 101                   | 0.98              |
|               | R: GTCCTTCTCGCAGAACCTTG    | 20                 |                       |                   |
| <i>HbPAL3</i> | F: CACGCCTCTGCCAATTTGTTA   | 21                 | 107                   | 0.93              |
|               | R: GGGAAATGCAGAATGCTCTTACA | 23                 |                       |                   |
| <i>HbPAL4</i> | F: GAATCGTCGAGAGGTGGTGT    | 20                 | 128                   | 0.95              |
|               | R: GCTCCTCGGTTGGTTCTTCT    | 20                 |                       |                   |
| <i>HbPAL5</i> | F: GGAATACGTGTTTCGCCTACG   | 20                 | 171                   | 0.96              |
|               | R: AGGGCCTTGAGTTCCTCTTC    | 20                 |                       |                   |
| <i>HbPAL6</i> | F: AAGTTTGCTAACCGGCGAGA    | 20                 | 143                   | 0.95              |
|               | R: CTTAGCTGATAGGAAGAGGAGCA | 23                 |                       |                   |
| <i>HbPAL7</i> | F: ATGTCCGCGACTTTCATGGT    | 20                 | 113                   | 0.99              |
|               | R: AGGGTTTTCTTACCGCCTG     | 20                 |                       |                   |
| <i>HbPAL8</i> | F: GTGACCGAGTAGCGAAGAGC    | 20                 | 90                    | 0.95              |
|               | R: TGGCACAAAATCCAGTGGTA    | 20                 |                       |                   |
| <i>HbUBC4</i> | F: TACAAAGAGGTGCAGCGTGA    | 20                 | 125                   | 0.96              |
|               | R: ACTCCGCCCTCATAAGGAGT    | 20                 |                       |                   |
